# Supplementary material
Source: PubMed Central journal article supplement (PMC7051028)
Supplement: NIHMS1523601-supplement-1.pdf [file NIHMS1523601-supplement-1.pdf]

## Reporting Summary

Nature Research wishes to improve the reproducibility of the work that we publish. This form provides structure for consistency and transparency in reporting. For further information on Nature Research policies, see [Authors & Referees](#) and the [Editorial Policy Checklist](#).

### Statistical parameters

When statistical analyses are reported, confirm that the following items are present in the relevant location (e.g. figure legend, table legend, main text, or Methods section).

n/a Confirmed

- The exact sample size ( $n$ ) for each experimental group/condition, given as a discrete number and unit of measurement
- An indication of whether measurements were taken from distinct samples or whether the same sample was measured repeatedly
- The statistical test(s) used AND whether they are one- or two-sided  
*Only common tests should be described solely by name; describe more complex techniques in the Methods section.*
- A description of all covariates tested
- A description of any assumptions or corrections, such as tests of normality and adjustment for multiple comparisons
- A full description of the statistics including central tendency (e.g. means) or other basic estimates (e.g. regression coefficient) AND variation (e.g. standard deviation) or associated estimates of uncertainty (e.g. confidence intervals)
- For null hypothesis testing, the test statistic (e.g.  $F$ ,  $t$ ,  $r$ ) with confidence intervals, effect sizes, degrees of freedom and  $P$  value noted  
*Give  $P$  values as exact values whenever suitable.*
- For Bayesian analysis, information on the choice of priors and Markov chain Monte Carlo settings
- For hierarchical and complex designs, identification of the appropriate level for tests and full reporting of outcomes
- Estimates of effect sizes (e.g. Cohen's  $d$ , Pearson's  $r$ ), indicating how they were calculated
- Clearly defined error bars  
*State explicitly what error bars represent (e.g. SD, SE, CI)*

*Our web collection on [statistics for biologists](#) may be useful.*

### Software and code

Policy information about [availability of computer code](#)

Data collection

No software and code were used for data collection.

Data analysis

Software and code used for data analysis are available, and this is described in detail in Supplementary Table 7. Custom software include Progeny Clustering (R package progenyclust), STRING, Graphical Lasso with StARS (R package huge), Cytoscape, block clustering (R package blockcluster), and decision trees (R package rpart). Links to the online tool for the MetaGalaxy Analysis, a tutorial, and example files are provided in the Supplementary Information, and are available online at <https://www.leukemiaatlas.org/code>.

For manuscripts utilizing custom algorithms or software that are central to the research but not yet described in published literature, software must be made available to editors/reviewers upon request. We strongly encourage code deposition in a community repository (e.g. GitHub). See the Nature Research [guidelines for submitting code & software](#) for further information.

## Data

Policy information about [availability of data](#)

All manuscripts must include a [data availability statement](#). This statement should provide the following information, where applicable:

- Accession codes, unique identifiers, or web links for publicly available datasets
- A list of figures that have associated raw data
- A description of any restrictions on data availability

The datasets generated and analysed during the study are available on the Leukaemia Proteome Atlas: LeukemiaAtlas.org (direct dataset-download at <https://www.leukemiaatlas.org/adultaml>). Source data for the figures in this study are also provided in .xlsx and .csv formats in figshare at <https://figshare.com/s/5ec75fb971747383c0be52> and are accessible directly from the Atlas (<https://www.leukemiaatlas.org/adultaml>).

## Field-specific reporting

Please select the best fit for your research. If you are not sure, read the appropriate sections before making your selection.

Life sciences  Behavioural & social sciences  Ecological, evolutionary & environmental sciences

For a reference copy of the document with all sections, see [nature.com/authors/policies/ReportingSummary-flat.pdf](https://nature.com/authors/policies/ReportingSummary-flat.pdf)

## Life sciences study design

All studies must disclose on these points even when the disclosure is negative.

|                 |                                                                                                                                                                                                                                                                                                                                                                                                                                                                                                                                                                                                                                                                                                                                                                                                                                                                                                                                                                                                                                                                                                                                                                                                                                                                                                                                                                                                                                                                                                                |
|-----------------|----------------------------------------------------------------------------------------------------------------------------------------------------------------------------------------------------------------------------------------------------------------------------------------------------------------------------------------------------------------------------------------------------------------------------------------------------------------------------------------------------------------------------------------------------------------------------------------------------------------------------------------------------------------------------------------------------------------------------------------------------------------------------------------------------------------------------------------------------------------------------------------------------------------------------------------------------------------------------------------------------------------------------------------------------------------------------------------------------------------------------------------------------------------------------------------------------------------------------------------------------------------------------------------------------------------------------------------------------------------------------------------------------------------------------------------------------------------------------------------------------------------|
| Sample size     | Sample size depended on the availability of patient samples collected over a nine-year period. We used all available acute myeloid leukaemia samples in the MD Anderson Cancer Center bank at the time of the analysis (co-senior author Steve Kornblau directs MD Anderson Cancer Center's Leukemia Sample Bank). Sample size per array depends on the constraints of the slides. 576 samples can fit on an array slide. The array used in this manuscript was a two-slide set, so we could accommodate up to 1152 total samples. Some slots were used for controls; this left space for 719 AML and acute promyelocytic leukaemia patient samples and for 360 acute lymphoblastic leukaemia (ALL) samples. We focused this manuscript and development of the MetaGalaxy analysis on the 511 AML patients, both because of the larger sample size compared to other leukaemias and because the complexity of the disease demanded a new analysis approach. ALL data is being separately analysed and reported, and is available through the links on the Leukemia Atlas site ( <a href="http://www.LeukemiaAtlas.org">www.LeukemiaAtlas.org</a> ). In addition to the available number of patients and the array itself limiting the sample size, sample collection from an individual patient is limited. Bone-marrow biopsies are invasive and painful procedures, and performed generally only at the time of diagnosis and relapse. Hence most patients provide only one or possibly two sets of samples. |
| Data exclusions | No data were excluded from the analyses.                                                                                                                                                                                                                                                                                                                                                                                                                                                                                                                                                                                                                                                                                                                                                                                                                                                                                                                                                                                                                                                                                                                                                                                                                                                                                                                                                                                                                                                                       |
| Replication     | Sample replicates were used to ensure the reproducibility of the proteomic measurement. The prognostic findings of this study were validated in a training and a testing subset of the data.                                                                                                                                                                                                                                                                                                                                                                                                                                                                                                                                                                                                                                                                                                                                                                                                                                                                                                                                                                                                                                                                                                                                                                                                                                                                                                                   |
| Randomization   | Not relevant because this study does not involve experimental groups.                                                                                                                                                                                                                                                                                                                                                                                                                                                                                                                                                                                                                                                                                                                                                                                                                                                                                                                                                                                                                                                                                                                                                                                                                                                                                                                                                                                                                                          |
| Blinding        | Not relevant because this study does not involve experimental groups.                                                                                                                                                                                                                                                                                                                                                                                                                                                                                                                                                                                                                                                                                                                                                                                                                                                                                                                                                                                                                                                                                                                                                                                                                                                                                                                                                                                                                                          |

## Reporting for specific materials, systems and methods

### Materials & experimental systems

| n/a                                 | Involved in the study                                           |
|-------------------------------------|-----------------------------------------------------------------|
| <input type="checkbox"/>            | <input checked="" type="checkbox"/> Unique biological materials |
| <input type="checkbox"/>            | <input checked="" type="checkbox"/> Antibodies                  |
| <input type="checkbox"/>            | <input checked="" type="checkbox"/> Eukaryotic cell lines       |
| <input checked="" type="checkbox"/> | <input type="checkbox"/> Palaeontology                          |
| <input checked="" type="checkbox"/> | <input type="checkbox"/> Animals and other organisms            |
| <input type="checkbox"/>            | <input checked="" type="checkbox"/> Human research participants |

### Methods

| n/a                                 | Involved in the study                           |
|-------------------------------------|-------------------------------------------------|
| <input checked="" type="checkbox"/> | <input type="checkbox"/> ChIP-seq               |
| <input checked="" type="checkbox"/> | <input type="checkbox"/> Flow cytometry         |
| <input checked="" type="checkbox"/> | <input type="checkbox"/> MRI-based neuroimaging |

## Obtaining unique materials

All cell lines are commercially available and/or can be requested from MD Anderson Cancer Center and/or the authors via a material transfer agreement. No new patient-derived cell lines or tissues are described in this manuscript. In any cases where the consent of leukaemia patients is provided to enable sharing, primary biopsy samples (biospecimens) can be requested from SMK and MD Anderson Cancer Center via a material transfer agreement.

## Antibodies

### Antibodies used

The full list of antibodies used and their related information is available in Supplementary Table 1, and listed below for the 231 antibodies used in this work.

Common Name/Mfg Claimed Target | Manufacturer | Catalog# | Antibody Source | Antibody Dilution | 2nd Ab dilution

Actin( $\beta$ ) Sigma A5441 mouse 2000 20000  
AIF Santa Cruz sc-13116 mouse 250  
AKT1 Cell Signaling 9272 Rabbit 150 15000  
AKT-P473(Ser) Cell Signaling 9271 Rabbit 50 15000  
AKT-P308(Thr) Cell Signaling 9275 Rabbit 50 15000  
Ash2L Cell Signaling 5019 Rabbit 5000 15000  
ASNS Sigma HPA029318 Rabbit 500 15000  
ATF3 Abcam ab87213 Rabbit 500 15000  
ATG7 Cell Signaling 8558 Rabbit 500 15000  
Bad Cell Signaling 9292 Rabbit 100 15000  
Bad-p112(Ser) Cell Signaling 9291 Rabbit 100 15000  
Bad-p136(Ser) Cell Signaling 9295 Rabbit 50 15000  
Bad-p155(Ser) Cell Signaling 9297 Rabbit 100 15000  
Bak Cell Signaling 3792 Rabbit 50 15000  
Bax Cell Signaling 2772 Rabbit 100 15000  
Bcl2 DAKO M0887 mouse 200 15000  
Bcl-XL Cell Signaling 2762 Rabbit 500 20000  
Bim Epitomics 1036-1 Rabbit 200 15000  
Beclin-1 Cell Signaling 3738 Rabbit 500 15000  
Bid Cell Signaling 2002 Rabbit 250 15000  
CIAP-1 Upstate 07-759 Rabbit 200 15000  
Survivin Cell Signaling 2802 Rabbit 50 15000  
Bmi-1 Cell Signaling 2830 Rabbit 150 15000  
Raf-B Santa Cruz sc5284 mouse 100 15000  
BRD4 Epitomics 5716-1 Rabbit 250 15000  
caspase 3 Cell Signaling 9662 Rabbit 250 15000  
Caspase 3 cleaved Asp175 Cell Signaling 9661 Rabbit 100 15000  
Caspase 7 cleaved Asp198 Cell Signaling 9491 Rabbit 250 15000  
Caspase 8 Cell Signaling 9746 mouse 250 15000  
Caspase 9 cleaved Asp315 Cell Signaling 9505 Rabbit 250 15000  
Caspase 9 cleaved Asp330 Cell Signaling 9501 Rabbit 250 15000  
Caveolin-1 Cell Signaling 3238 Rabbit 100 15000  
Cbl-c BD sciences 610441 mouse 1000 15000  
Cyclin B1 Santa Cruz SC245 mouse 100 15000  
Cyclin D1(M-20) Santa Cruz sc718 Rabbit 500 15000  
Cyclin D3 Cell Signaling 2936 mouse 100 15000  
Cyclin E Santa Cruz sc-247 Rabbit 100 15000  
Cyclin E2 Cell Signaling 1142 Rabbit 250 15000  
CD44.Epi Epitomics 1998-1 Rabbit 2000 15000  
CD74 Santa Cruz sc-6262 mouse 300 15000  
CDC2 calbiochem cc01 mouse 200 15000  
CDK2 Santa Cruz SC6248 200 15000  
CDK4 Cell Signaling 2906 mouse 200 15000  
P21/Waf Cell Signaling 2946 mouse 250 10000  
P27 Santa Cruz sc-528 Rabbit 250 15000  
P27ps10 Epitomics 2187-1 Rabbit 500 15000  
P16 santa Cruz sc468 Rabbit 5000 15000  
CLPP Abcam 124822 Rabbit 1000 15000  
JAB1 Santa Cruz sc-13157 mouse 300 15000  
CREB Epitomics 1496-1 Rabbit 2000 15000  
CREB-p(ser133) Epitomics 1113-1 Rabbit 2000 15000  
Catenin-alpha calbiochem CA1030 mouse 75 15000  
Catenin-beta Cell Signaling 9562 Rabbit 50 15000  
catenin-beta phospho- Cell Signaling 9561 Rabbit 500 15000  
CTSG Abcam ab8816 sheep 500 30000  
Smac/Diablo Cell Signaling 2954 mouse 500 15000  
DLX1 Abnova H00001745-M01 mouse 1000 15000  
DUSP6 abcam ab76310 Rabbit 3000 15000

EGFR Santa Cruz sc-03 Rabbit 500 20000  
 EGFR-p tyr992 Cell Signaling 2235 Rabbit 50 15000  
 Eln1 Millipore 05-1327 mouse 500 5000  
 PRKR(EIF2AK2) Abnova H00005610-M02 mouse 5000 15000  
 PRKRpTh451(EIF2AK2) invitrogen 44-668G Rabbit 1500 15000  
 eIF2 Cell Signaling 9722 Rabbit 3000 15000  
 phospho-eIF2-alpha Cell Signaling 9721 Rabbit 250 15000  
 eIF4E Cell Signaling 9742 Rabbit 200 15000  
 EBP1 Cell Signaling 9452 Rabbit 500 15000  
 EBP1.pser65 Cell Signaling 9456 Rabbit 400 15000  
 EBP1.pthr37.46 Cell Signaling 9459 Rabbit 1000 15000  
 EBP1.pthr70 Cell Signaling 9455 Rabbit 200 15000  
 Elk(phospho-ser383) Cell Signaling 9181 Rabbit 100 15000  
 HER2/Erb2 Cell Signaling 2242 Rabbit 250 15000  
 HER2(p-Tyr1248) Upstate 06-229 Rabbit 1500 15000  
 HER3 Upstate 05-390 mouse 500 15000  
 ERG1/2/3 Santa Cruz sc-353 Rabbit 1000 15000  
 Fli Dennis Watson Rabbit 2000 15000  
 Fibronectin Epitomics 1574 Rabbit 30000 15000  
 FoxO1a/3a Cell Signaling 9464 Rabbit 500 15000  
 FoxO3a Cell Signaling 9467 Rabbit 500 20000  
 FKHL1/FoxO3a (P-Ser 318/321) Cell Signaling 9465 Rabbit 10000 15000  
 Gab2 Cell Signaling 3239 Rabbit 500 15000  
 Gab2-pTyr452 Cell Signaling 3882 Rabbit 100 15000  
 GAPDH Cell Signaling 4300 mouse 2000 15000  
 GATA-1 Cell Signaling 3535 Rabbit 1000 15000  
 Gata3 BD bioscience 558686 mouse 500 15000  
 GSK3 santa Cruz sc-7291 mouse 200 15000  
 GSK3a/B(p-ser21/9) Cell Signaling 9331 Rabbit 200 15000  
 H3histone active motif 39163 Rabbit 1500000 40000  
 H3K27Me3 active motif 61017 mouse 3000 40000  
 H3K4Me2 active motif 39141 Rabbit 8000 20000  
 H3K4Me3 active motif 39159 Rabbit 7000 20000  
 HDAC1 Imgenex IM-337 Rabbit 400 20000  
 HDAC2 Santa Cruz sc-7899 Rabbit 1000 15000  
 HDAC3 Cell Signaling 2632 Rabbit 100 15000  
 HIF-1 $\alpha$  BD pharmingen 610959 mouse 50 15000  
 hnRNPK Santa Cruz sc-28380 mouse 5000 15000  
 HSP90 Cell Signaling 4875 Rabbit 500 15000  
 HSP70 Cell Signaling 4872 Rabbit 250 15000  
 HSP27 Cell Signaling 2402 mouse 100 15000  
 IGF-1 receptor beta Cell Signaling 3027 Rabbit 1000 15000  
 IGFBP-2 Cell Signaling 3922 Rabbit 250 15000  
 SHIP1 Santa Cruz SC-8425 mouse 250 15000  
 SHIP2 Cell Signaling 2730 Rabbit 300 15000  
 IRS-1-p(ser1101) Cell Signaling 2385 Rabbit 250 15000  
 CD49b BD Transduction Lab 611016 mouse 500 15000  
 CD11a BD Transduction Lab 610826 mouse 500 15000  
 Integrin-beta3 Cell Signaling 4702 Rabbit 250 15000  
 JMJD6 Abcam ab50720 Rabbit 1000 20000  
 Jun-C-phospho ser73 Cell Signaling 9164 Rabbit 100 10000  
 Jun-B Cell Signaling 3755 Rabbit 100 15000  
 LSD1 Cell Signaling 2184 Rabbit 3000 15000  
 VEGFR2 Cell Signaling 2479 Rabbit 700 15000  
 Kit-C Epitomics 1522 Rabbit 1000 15000  
 Lck Cell Signaling 2752 Rabbit 50 15000  
 LEF1 Cell Signaling 2230 Rabbit 1000 15000  
 Galectin-3 Santa Cruz sc-32790 mouse 250 15000  
 Lyn Cell Signaling 2732 Rabbit 250 15000  
 MEK Cell Signaling 9122 Rabbit 2000 10000  
 MEK(p-ser217/221) Cell Signaling 9121 Rabbit 1000 15000  
 Erk2 Santa Cruz Sc-154 Rabbit 2000 15000  
 Erk-p42/44(Thr202/Tyr204) Cell Signaling 9101 Rabbit 400 15000  
 P38 Cell Signaling 9212 Rabbit 200  
 P38p180p182 Cell Signaling 9211 Rabbit 10 15000  
 JNK2 Cell Signaling 4672 Rabbit 25 15000  
 Tau Upstate 05-348 mouse 150 15000  
 MCL1 BD pharmingen 559027 mouse 50 15000  
 MDM2 Santa Cruz sc813 Rabbit 5000 15000  
 MDM4 Bethly lab A300-287A Rabbit 5000 15000  
 C-Met-pTyr 1230/1234/1235 Biosource 44-888G Rabbit 250 20000  
 mTor Cell Signaling 2983 Rabbit 200 10000  
 mTor(p-Ser2448) Cell Signaling 2971 Rabbit 100 15000  
 Myc Cell Signaling 9402 Rabbit 100 15000  
 C23 (nucleolin) Santa Cruz sc8031 mouse 200 15000

NF2 Santa Cruz sc332 Rabbit 500 15000  
 pNF2(ser518) chemicon AB5607 Rabbit 500 15000  
 ARC Imgenex IMG-171 Rabbit 2000 15000  
 Notch1-cleaved (Val1744) Cell Signaling 4147 Rabbit 400 15000  
 Notch3 santa Cruz sc5593 Rabbit 200 15000  
 NPM invitrogen 32-5200 mouse 10000 15000  
 NPM1.3542 Cell Signaling 3542 Rabbit 1000 15000  
 Nur77 Imgenex IMG-528 Rabbit 200 15000  
 NRP1(neuropilin) Santa Cruz SC-5307 mouse 10 20000  
 ODC Shantz/Lisa Lab 500 15000  
 DJ-1 Private-Andreeff Rabbit 500 15000  
 PARP Cell Signaling 9542 Rabbit 200 15000  
 PARP(cleaved Asp214) Cell Signaling 9541 Rabbit 100 15000  
 PDK1 Cell Signaling 3062 Rabbit 200 15000  
 PDK1-p241(Ser) Cell Signaling 3061 Rabbit 500 15000  
 PI3 K p110-alpha Epitomics 1683-1 Rabbit 200 15000  
 PI3 K p85 Cell Signaling 4292 Rabbit 20 15000  
 PIM1 Santa Cruz sc-13153 mouse 100 15000  
 PIM2 Cell Signaling 4730 Rabbit 200 15000  
 PPARA boster Bio PA1412 Rabbit 0.5ug/ul 30000  
 PPARγ Santa Cruz sc7273 mouse 75 15000  
 PP2A-B55 Santa Cruz sc-18330 goat 500 15000  
 AMPKα cell signaling 2532 Rabbit 200 15000  
 AMPKα P(Thr172) cell signaling 2535 Rabbit 200 15000  
 PKCα Upstate 05-154 mouse 2000 15000  
 PKCα-p657(Ser) Upstate 06-822 Rabbit 1000 20000  
 PKCβ I Santa Cruz sc8049 mouse 300 20000  
 PKCβII Santa Cruz 13149 mouse 200 15000  
 PKCδ-645(Ser) Upstate 07-875 Rabbit 200 30000  
 PKCδ-p664(Ser) Upstate 07-874 Rabbit 250 30000  
 PKCδ-507(Thr) Santa Cruz sc11770 Goat 1000 30000  
 PTEN Upstate 07-016 Rabbit 400 15000  
 PTEN-p (380/382/383) Cell Signaling 9554 Rabbit 500 15000  
 cox-2 Epitomics 2169-1 Rabbit 250 15000  
 Fak Cell Signaling 3285 Rabbit 500 15000  
 SHP-2 Epitomics 1590-1 Rabbit 500 15000  
 Rac1/2/3 Cell Signaling 2465 Rabbit 500 15000  
 Rb BD PharMingen 554136 mouse 100 15000  
 Rb (P-Ser807/811) Cell Signaling 9308 Rabbit 250 15000  
 NF-kB p65 Cell Signaling 3034 Rabbit 500 15000  
 S6 Ribosomal protein Cell Signaling 2217 Rabbit 250 15000  
 S6 Ribosomal protein(phospho-ser235/236) Cell Signaling 2211 Rabbit 1500-2000 15000  
 S6 Ribosomal protein(phospho-ser240/244) Cell Signaling 2215 Rabbit 750-1000 15000  
 p70S6K Cell Signaling 9202 Rabbit 250 15000  
 p70S6K(p-thr389) Cell Signaling 9205 Rabbit 250 15000  
 X14.3.3Sigma Upstate 05-632 mouse 200 15000  
 SIRT1 Abcam ab32441 Rabbit 1000 15000  
 smad1 Epitomics 1649-1 Rabbit 200 15000  
 SMAD2 Cell Signaling 5339 Rabbit 5000 15000  
 Smad2-p S245/250/255 Cell Signaling 3104 Rabbit 500 15000  
 Smad2-p S465/467 Cell Signaling 3108 Rabbit 1000 15000  
 SMAD3 Cell Signaling 9523 Rabbit 500 15000  
 smad4 Santa Cruz sc7966 mouse 1000 15000  
 SMAD5 epitomics 1682-1 Rabbit 1000 15000  
 Smad5-p S463/465 epitomics 2224-1 Rabbit 500 15000  
 Smad6 Cell Signaling 9519 Rabbit 100 15000  
 SOCS2 Abcam ab92847 Rabbit 200 15000  
 PU.1 Cell Signaling 2258 Rabbit 5000 15000  
 Osteopontin Santa Cruz sc-21742 mouse 500 15000  
 P62 Santa Cruz sc-28359 mouse 250 15000  
 Src Upstate 05-184 mouse 600 15000  
 Src(phospho-tyr416) Cell Signaling 2101 Rabbit 400 15000  
 Src(phospho-tyr527) Cell Signaling 2105 Rabbit 100 15000  
 SSBP2-I(alpha) Private-Nagarajan Rabbit 1000 15000  
 stat1 Cell Signaling 9172 250 15000  
 Stat1(phospho-tyr701) Cell Signaling 9171 Rabbit 100 15000  
 Stat3 Upstate 06-596 Rabbit 50 15000  
 Stat3-p727(Ser) Cell Signaling 9134 Rabbit 100 15000  
 Stat3 p705(Tyr) Cell Signaling 9131 Rabbit 500 15000  
 Stat5 Cell Signaling 9352 Rabbit 250 15000  
 Stat5(phospho-Tyr694) Cell Signaling 9351 Rabbit 100 15000  
 Stat6(phospho-tyr641) Cell Signaling 9361 Rabbit 100 10000  
 LKB1/STK11 Cell Signaling 3050 Rabbit 500 15000  
 Stathmin epitomics 1972-1 Rabbit 30000 15000  
 TCF-4 Santa Cruz sc8632 goat 400 15000

TG2 Abcam ab2386 mouse 2000 30000  
 TNK1 Agent AP7722a Rabbit 400 15000  
 TP53 Cell Signaling 9282 Rabbit 1000 15000  
 TP53(phospho Ser 15) Cell Signaling 9284 Rabbit 250 15000  
 TRIM24 Novus NB100-2597 Rabbit 1000 15000  
 TRIM62 from Dr.Quintas-cardama DEAR1 mouse 150 15000  
 TSC2 epitomic 1613-1 Rabbit 500 15000  
 VASP Cell Signaling 3112 Rabbit 250 15000  
 VHL Novus NB100-485 Rabbit 2000 15000  
 WTAP sanjay bansal from UTSA Rabbit 10000 15000  
 TAZ Abcam ab3961 Rabbit 1000 15000  
 TAZ p-Ser89 Santa Cruz sc17610R Rabbit 150 15000  
 XIAP Cell Signaling 2042 Rabbit 100 15000  
 CRM1 Santa Cruz sc-5595 Rabbit 2000 15000  
 YAP Cell Signaling 4912 Rabbit 100 15000  
 YAP-p(ser127) Cell Signaling 4911 Rabbit 500 15000  
 X14.3.3Epsilon Santa Cruz sc-23957 mouse 200 15000  
 14-3-3-zeta chemicon AB9746 Rabbit 750 20000  
 ZNF342 abcam ab51265 Rabbit 1000 15000  
 JAZ111 May-UFL Rabbit 1000 15000

#### Validation

All antibodies used in this study have been strictly validated as described in previous publications:  
 Kornblau SM, Tibes R, Qiu YH, Chen W, Kantarjian HM, Andreeff M, Coombes KR, Mills GB (2009) Functional proteomic profiling of AML predicts response and survival. *Blood* 113: 154-164.  
 Tibes R, Qiu YH, Lu Y, Hennessy B, Andreeff M, Mills GB, Kornblau SM (2006) Reverse Phase Protein Array (RPPA): Validation of a Novel Proteomic Technology and Utility for Analysis of Primary Leukemia Specimens and Hematopoietic Stem Cells (HSC). *Mol Cancer Ther* 5: 2512-2521.

## Eukaryotic cell lines

### Policy information about [cell lines](#)

#### Cell line source(s)

The cell-line sources are described in Supplementary Table 5 and listed below:

cell-line | mycoplasma | disease  
 Blin-1 neg BCP-ALL  
 BV173 pos B cell precursor leukemia  
 BV173 neg B cell precursor leukemia  
 BV173 treated neg B cell precursor leukemia  
 CCRF-CEM neg leukemia, T lymphoblast  
 Daudi pos b lymphoblast, Burkitt's lymphoma  
 Daudi neg b lymphoblast, Burkitt's lymphoma  
 RPMI8226  
 GM00131 2nd-neg lymphoblastoid cell line  
 GM00131 treated neg lymphoblastoid cell line  
 HL-60 pos leukemia, AML M2  
 HL-60 neg leukemia, AML M2  
 HL60 neg leukemia, AML M2  
 HL-60 treated neg leukemia, AML M2  
 HL-60 TRE TGM2 neg leukemia, AML M2  
 HL-60 TRE TGM2 control neg leukemia, AML M2  
 Jeko-1 neg lymphoma  
 Jurkat 2nd-neg leukemia T-ALL  
 Jurkat treated neg leukemia T-ALL  
 Jurkat I9.2 Caspase8 mut neg leukemia T-ALL  
 K562 pos leukemia, CML  
 K562 neg leukemia, CML  
 K562 treated neg leukemia, CML  
 kasumi-1 pos leukemia, AML M2  
 kasumi-1 neg leukemia, AML M2  
 kasumi-1 treated leukemia, AML M2  
 KBM3 neg leukemia, AML M5  
 KBM5 pos leukemia, CML  
 KBM5 neg leukemia, CML  
 KBM5 treated neg leukemia, CML  
 KBM5 STI, w/o STI pos CML T315I  
 KBM5 STI, w/STI neg CML T315I  
 KBM5 STI, w/o STI neg CML T315I  
 KBM5 STI treated, w/o STI neg CML T315I  
 KG-1 pos leukemia, AML M3  
 KG1 neg leukemia, AML M3  
 KG-1 treated neg leukemia, AML M3  
 KG-1 $\alpha$  neg leukemia, AML M3  
 KOPTI-K1 (lable:KOPTI) neg T-ALL  
 MDSL neg MDS

MINO neg Mantle Cell Lymphoma  
 ML-1 pos leukemia, AML M3  
 ML-1 neg leukemia, AML M3  
 ML-1 treated neg leukemia, AML M3  
 ML-2 (AML-ML2) neg leukemia, AML M4  
 Mo7e 2nd-neg leukemia, AML M7  
 Molm13 neg leukemia, AML M5a  
 Molm13 P53 K/D neg leukemia, AML M5a  
 Molm13 P53 vector neg leukemia, AML M5a  
 Molm14 2nd-neg leukemia, AML M5a  
 molm14 neg leukemia, AML M5a  
 molm14 treated neg leukemia, AML M5a  
 molm16  
 molt3 neg T lymphoblast, T-ALL  
 Molt4 neg T lymphoblast, T-ALL  
 MR2 pos APL  
 MR2 treated neg APL  
 MV4-11 pos leukemia, AML M5  
 MV4-11 neg leukemia, AML M5  
 MV4-11 treated leukemia, AML M5  
 MV4-11 IDH1 R132H neg leukemia, AML M5  
 MV4-11 IDH1 wt(vector) neg leukemia, AML M5  
 Nalm6 pos B-ALL  
 Nalm6 treated neg B-ALL  
 NB4 neg leukemia, AML M3  
 OCIAML2 neg leukemia, AML M4  
 OCIAML3 neg leukemia, AML M4  
 OCIAML3 550 TGM2-overexp neg leukemia, AML M4  
 OCIAML3 708 ppp2R2A shRNA neg leukemia, AML M5  
 OCIAML3 709 ppp2R2A shRNA neg leukemia, AML M4  
 OCIAML3 Bcl2 overexpression neg leukemia, AML M4  
 OCIAML3 Bcl2 vector neg leukemia, AML M4  
 OCIAML3 IDH1 R132H neg leukemia, AML M4  
 OCIAML3 IDH1 wt(vector) neg leukemia, AML M4  
 OCIAML3 inducible HIF1a ODD mut neg leukemia, AML M4  
 OCIAML3 ITD pos leukemia, AML M4  
 OCIAML3 ITD treated neg leukemia, AML M4  
 OCIAML3 ITD vec neg leukemia, AML M4  
 OCIAML3 NS for ppp2R2A shRNA neg leukemia, AML M4  
 OCIAML3 p100SSAA neg leukemia, AML M4  
 OCIAML3 P53 shRNA neg leukemia, AML M4  
 OCIAML3 P53 vector neg leukemia, AML M4  
 OCIAML3 PI3K active pool #1 neg leukemia, AML M4  
 OCIAML3 PI3K wt pool#2 1A neg leukemia, AML M4  
 OCIAML3 Stat5A neg leukemia, AML M4  
 OCIAML3 stat5A N642H neg leukemia, AML M4  
 OCIAML3 stat5A N642H H4F neg leukemia, AML M4  
 OCIAML3 stat5A wt neg leukemia, AML M4  
 OCIAML3 TRE TGM2 neg leukemia, AML M4  
 OCIAML3 TRE TGM2 control neg leukemia, AML M4  
 OCIAML5 neg leukemia, AML M4  
 P12 ichikawa neg T-ALL  
 Raji pos B lymphocyte, Burkitt's lymphoma  
 Raji neg B lymphocyte, Burkitt's lymphoma  
 Raji treated neg B lymphocyte, Burkitt's lymphoma  
 Ramos neg lymphoma  
 REH pos ALL  
 REH neg ALL  
 REH treated neg ALL  
 REH PLKO CTGF neg ALL  
 REH PLKO-NS-shrRNA(control) neg ALL  
 RS4:11 2nd-neg leukemia, BCP-ALL  
 RS4:11 treated neg leukemia, BCP-ALL  
 SKM1 neg leukemia, AML M5  
 SR neg leukemia, lymphoblast, lymphoma  
 TALL-1 neg T cell leukemia  
 TF-1 neg leukemia, AML M6  
 THP-1 neg leukemia, AML M4  
 U937 pos leukemia, AML M5  
 U937 neg leukemia, AML M5  
 U937 treated neg leukemia, AML M5

Authentication

DNA validation by short tandem repeat "barcoding"

Mycoplasma contamination

The testing results of mycoplasma contamination for all cell lines used were described in Supplementary Table 5 and listed

below:  
cell-line | mycoplasma  
Blin-1 neg  
BV173 pos  
BV173 neg  
BV173 treated neg  
CCRF-CEM neg  
Daudi pos  
Daudi neg  
RPMI8226  
GM00131 2nd-neg  
GM00131 treated neg  
HL-60 pos  
HL-60 neg  
HL60 neg  
HI-60 treated neg  
HL-60 TRE TGM2 neg  
HL-60 TRE TGM2 control neg  
Jeko-1 neg  
Jurkat 2nd-neg  
Jurkat treated neg  
Jurkat I9.2 Caspase8 mut neg  
K562 pos  
K562 neg  
K562 treated neg  
kasumi-1 pos  
kasumi-1 neg  
kasumi-1 treated  
KBM3 neg  
KBM5 pos  
KBM5 neg  
KBM5 treated neg  
KBM5 STI, w/o STI pos  
KBM5 STI, w/STI neg  
KBM5 STI, w/o STI neg  
KBM5 STI treated, w/o STI neg  
KG-1 pos  
KG1 neg  
KG-1 treated neg  
KG-1 $\alpha$  neg  
KOPTI-K1 (labeled:KOPTI) neg  
MDSL neg  
MINO neg  
ML-1 pos  
ML-1 neg  
ML-1 treated neg  
ML-2 (AML-ML2) neg  
Mo7e 2nd-neg  
Molm13 neg  
Molm13 P53 K/D neg  
Molm13 P53 vector neg  
Molm14 2nd-neg  
molm14 neg  
molm14 treated neg  
molm16  
molt3 neg  
Molt4 neg  
MR2 pos  
MR2 treated neg  
MV4-11 pos  
MV4-11 neg  
MV4-11 treated  
MV4-11 IDH1 R132H neg  
MV4-11 IDH1 wt(vector) neg  
Nalm6 pos  
Nalm6 treated neg  
NB4 neg  
OCIAML2 neg  
OCIAML3 neg  
OCIAML3 550 TGM2-overexp neg  
OCIAML3 708 ppp2R2A shRNA neg  
OCIAML3 709 ppp2R2A shRNA neg  
OCIAML3 Bcl2 overexpression neg  
OCIAML3 Bcl2 vector neg  
OCIAML3 IDH1 R132H neg



OCIAML3 IDH1 wt(vector) neg  
 OCIAML3 inducible HIF1a ODD mut neg  
 OCIAML3 ITD pos  
 OCIAML3 ITD treated neg  
 OCIAML3 ITD vec neg  
 OCIAML3 NS for ppp2R2A shRNA neg  
 OCIAML3 p100SSAA neg  
 OCIAML3 P53 shRNA neg  
 OCIAML3 P53 vector neg  
 OCIAML3 PI3K active pool #1 neg  
 OCIAML3 PI3K wt pool#2 1A neg  
 OCIAML3 Stat5A neg  
 OCIAML3 stat5A N642H neg  
 OCIAML3 stat5A N642H H4F neg  
 OCIAML3 stat5A wt neg  
 OCIAML3 TRE TGM2 neg  
 OCIAML3 TRE TGM2 control neg  
 OCIAML5 neg  
 P12 ichikawa neg  
 Raji pos  
 Raji neg  
 Raji treated neg  
 Ramos neg  
 REH pos  
 REH neg  
 REH treated neg  
 REH PLKO CTGF neg  
 REH PLKO-NS-shRNA(control) neg  
 RS4:11 2nd-neg  
 RS4:11 treated neg  
 SKM1 neg  
 SR neg  
 TALL-1 neg  
 TF-1 neg  
 THP-1 neg  
 U937 pos  
 U937 neg  
 U937 treated neg

Commonly misidentified lines  
(See [ICLAC](#) register)

No commonly misidentified cell lines were used.

## Human research participants

Policy information about [studies involving human research participants](#)

|                            |                                                                                                                                                                                                                                                                                                                                                                                                                                                                                                                                                                                                                                                                                                                                                                                                                  |
|----------------------------|------------------------------------------------------------------------------------------------------------------------------------------------------------------------------------------------------------------------------------------------------------------------------------------------------------------------------------------------------------------------------------------------------------------------------------------------------------------------------------------------------------------------------------------------------------------------------------------------------------------------------------------------------------------------------------------------------------------------------------------------------------------------------------------------------------------|
| Population characteristics | The population characteristics of all human research participants were described in Supplementary Table 6. In brief, there were 511 newly diagnosed AML samples on the array and 47 had a paired relapse sample. There were no biases for age (other than these are adults) or gender. Patients received many different treatments.                                                                                                                                                                                                                                                                                                                                                                                                                                                                              |
| Recruitment                | Samples from AML patients (diagnosed at the University of Texas M.D. Anderson Cancer Center (MDACC) between September 1999 and March 2007) were acquired during routine diagnostic assessments in accordance with the regulations and protocols (Lab 01-473) approved by the Investigational Review Board (IRB) of MDACC. Informed consent was obtained in accordance with Declaration of Helinski. Samples were analyzed under and IRB-approved laboratory protocol (Lab 05-0654). The only selection biases is that (1) a patient had to be willing to sign the consent allowing us to collect material, and (2) they had to have adequate cell biopsy material for the bone marrow biopsies, so some “dry tap” cases would be omitted. These selection biases would not be anticipated to affect the results. |
