# Supplementary material
Source: PubMed Central journal article supplement (PMC7051028)
Supplement: NIHMS1523601-supplement-2.pdf [file NIHMS1523601-supplement-2.pdf]

## Supplemental Figures, Tables & Tutorial

| <b>Supplemental Figures</b>                                                  |                                                                                              | <b>Page</b> |
|------------------------------------------------------------------------------|----------------------------------------------------------------------------------------------|-------------|
| <b>Figure S1</b>                                                             | Proteomic differences between fresh and cryopreserved samples.                               | <b>1</b>    |
| <b>Figure S2</b>                                                             | Protein networks for discovering potential drug targets beyond individual functional groups. | <b>3</b>    |
| <b>Figure S3</b>                                                             | Clustering results based on protein expression levels.                                       | <b>5</b>    |
| <b>Figure S4</b>                                                             | Kaplan-Meier curves from training and testing data.                                          | <b>7</b>    |
| <b>Figure S5</b>                                                             | Potential drug targets from signatures.                                                      | <b>9</b>    |
| <b>Figure S6</b>                                                             | Clustering of cell lines together with AML patient samples.                                  | <b>11</b>   |
| <b>Supplemental Tables</b> (provided as documents, followed by spreadsheets) |                                                                                              |             |
| <b>Table S1</b>                                                              | Antibody nomenclature table.                                                                 | <b>13</b>   |
| <b>Table S2</b>                                                              | Correlation between post-translational modifications and total protein expression levels.    | <b>23</b>   |
| <b>Table S3</b>                                                              | Functional group memberships.                                                                | <b>25</b>   |
| <b>Table S4</b>                                                              | Constellation memberships for functional patterns.                                           | <b>26</b>   |
| <b>Table S5</b>                                                              | Functional pattern memberships for cell lines.                                               | <b>28</b>   |
| <b>Table S6</b>                                                              | Demographic information of patients overall and in each signature (S1-S13).                  | <b>33</b>   |
| <b>Table S7</b>                                                              | Method implementation and parameter specification.                                           | <b>35</b>   |
| <b>Table S8</b>                                                              | Stability scores from Progeny Clustering for co-clustering.                                  | <b>37</b>   |
| <b>MetaGalaxy Analysis Online Tool Tutorial</b>                              |                                                                                              | <b>38</b>   |

Example demo files (main.csv & pathway.csv) provided

**Figure S1. Proteomic differences between fresh and cryopreserved samples. (A)** Antibodies from the RPPA were grouped into 31 functional groups (shown as rows), and cluster analysis (Progeny Clustering with K-means) was performed using all samples (fresh and cryopreserved) to identify recurrent functional patterns (shown as columns). Functional patterns that only occur in cryopreserved samples (missing in fresh) were colored in black, whereas patterns that only occur in fresh samples (missing in cryo) were colored in grey. **(B)** Proteins from the *Adhesion group* were shown as an example to demonstrate varied expression distributions by sample source (i.e. peripheral blood (labeled “PB”) or bone marrow (labeled “BM”)) and processing technique (whether protein was prepared from fresh or previously cryopreserved cells (labeled “Cryo”). The protein expression distributions in cryopreserved bone marrow CD34+ cells from healthy subjects (labeled “CD34+”) were also shown in comparison. See **Table S1** for the functional group category and sample source comparison statistics for each protein.

# A

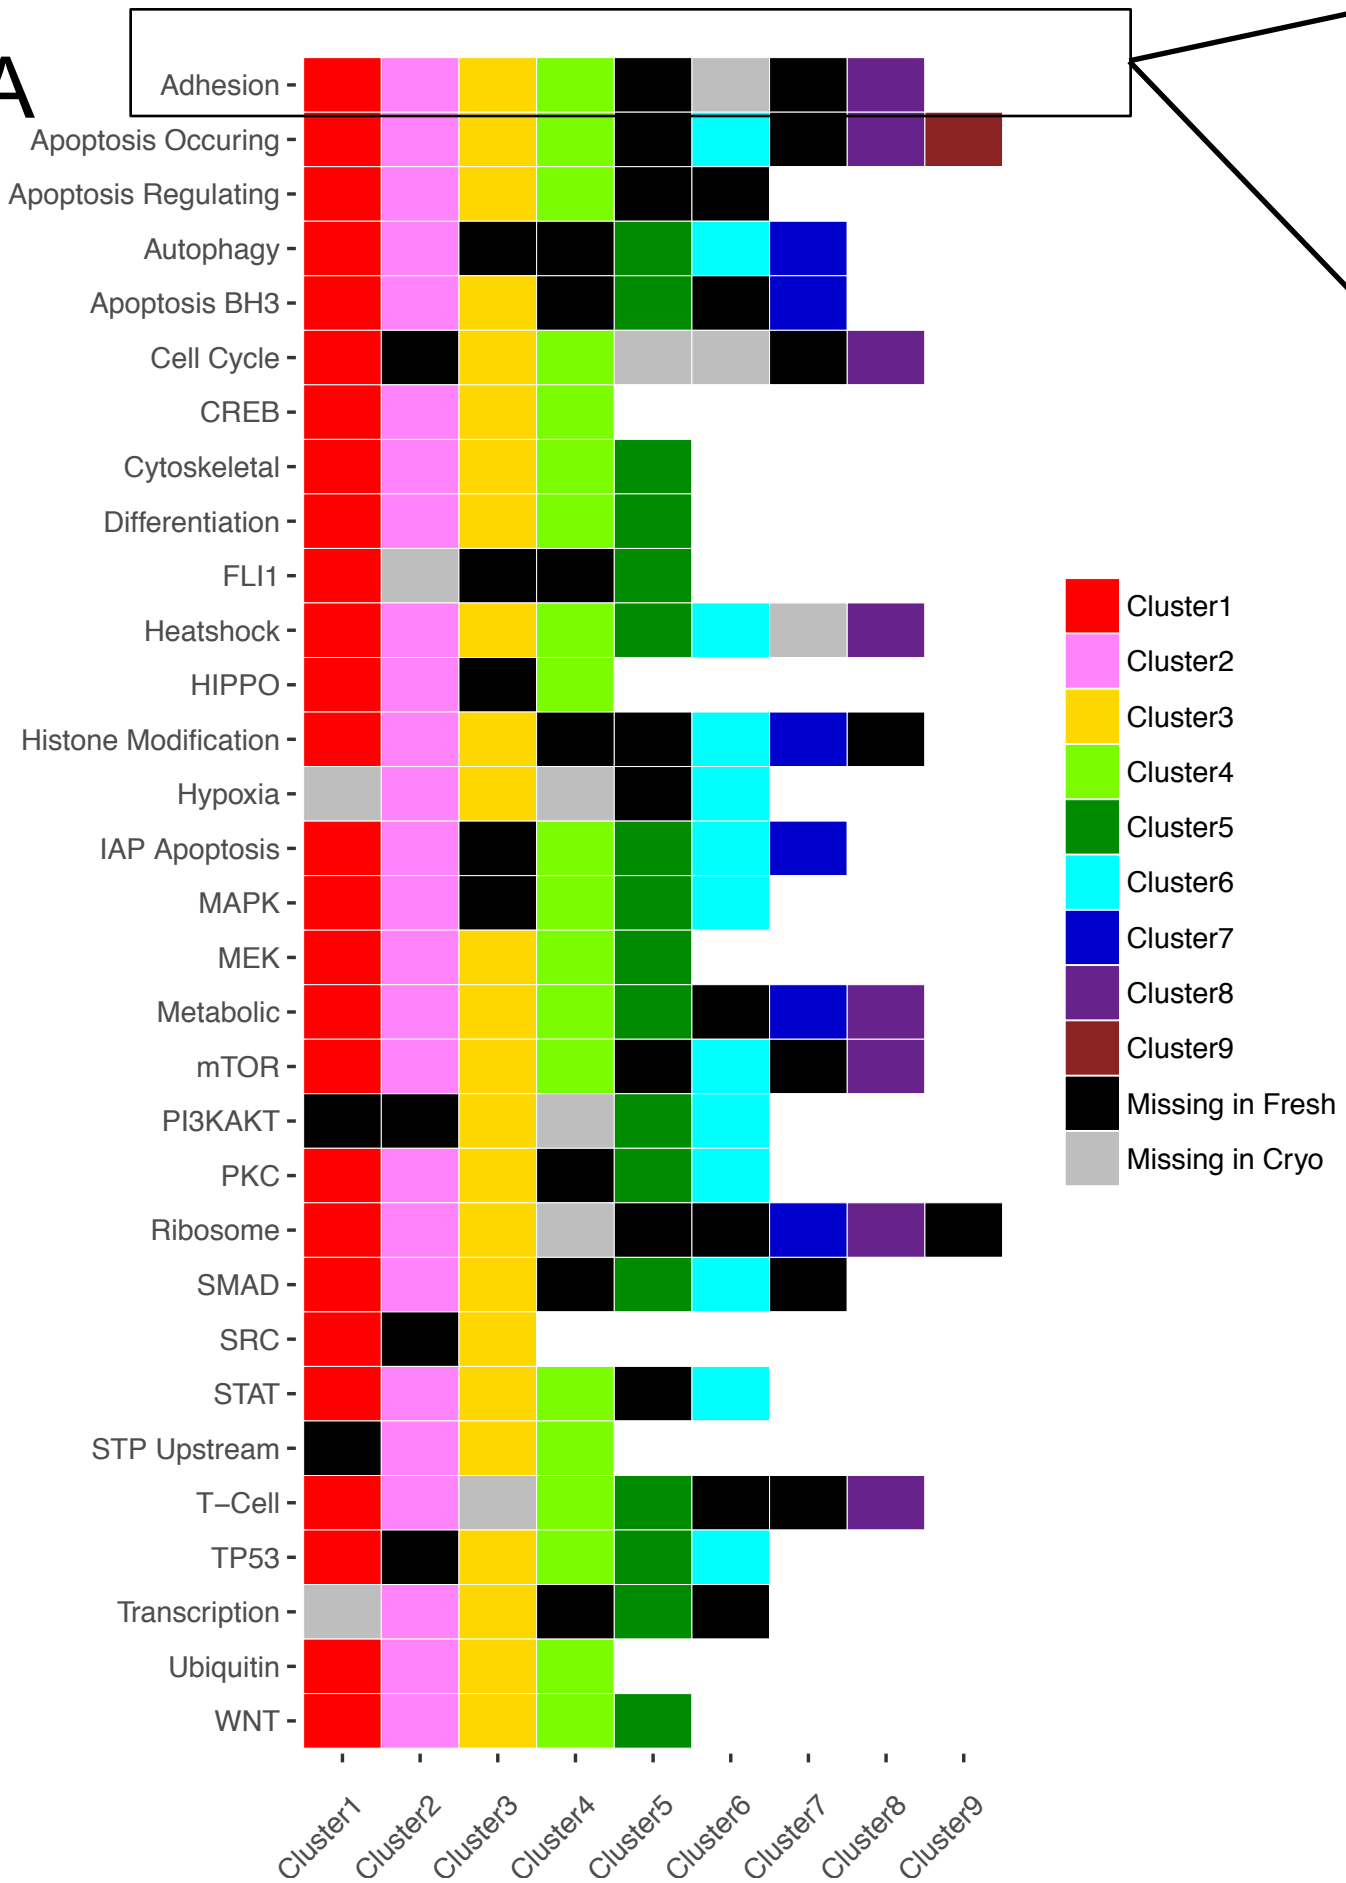

# B

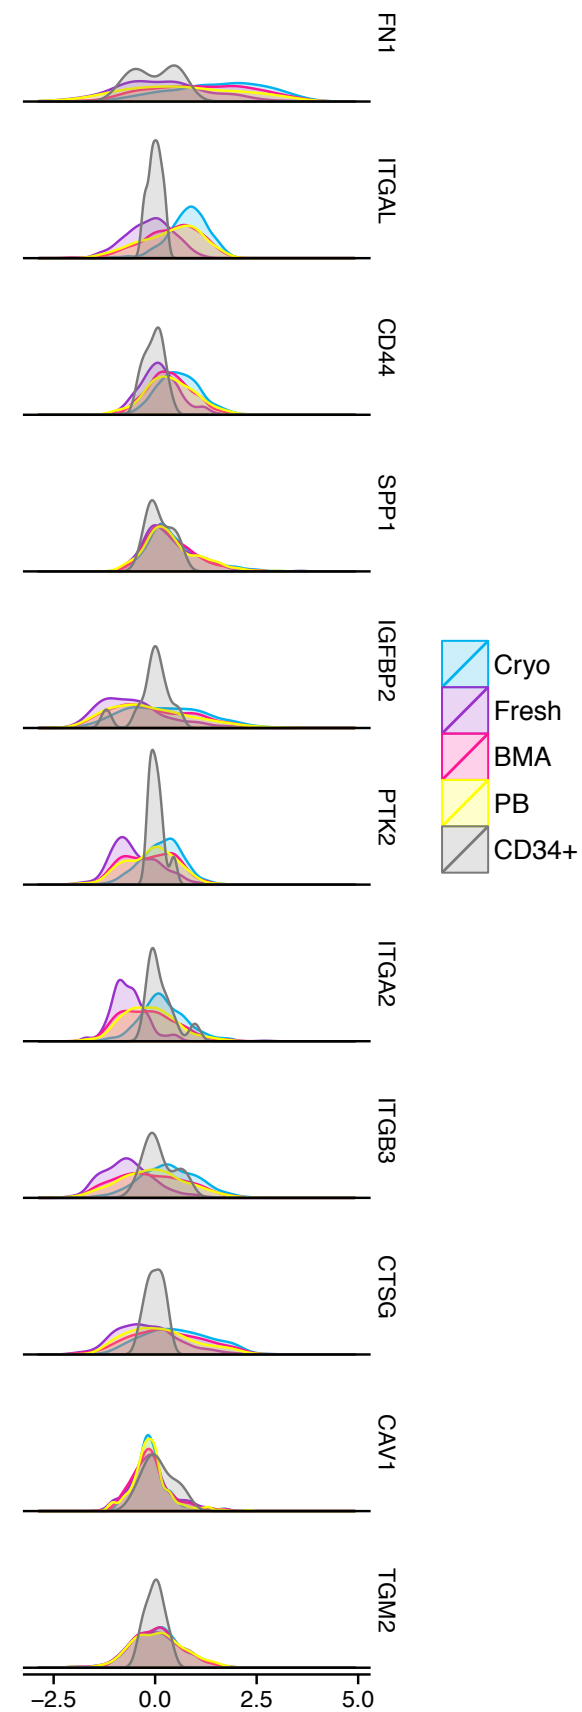

**Figure S2. Protein networks for discovering potential drug targets beyond individual functional groups.** (A) The protein network for *SMAD-P5* demonstrates the interactions (shown as edges) and expression levels (shown as node colors) of the SMAD proteins (shown in large nodes) and proteins that directly associate with them (shown in small nodes). Highlighted by a red arrow, ERG with abnormally high expression level can serve a potential drug target as an alternative to targeting SMAD2.p and SMAD1. (B) Proteins with abnormally high and low expressions compared to the normal range were selected and can potentially be tested as drug targets. The node color reflects the relative expression levels compared to that in control samples.

A

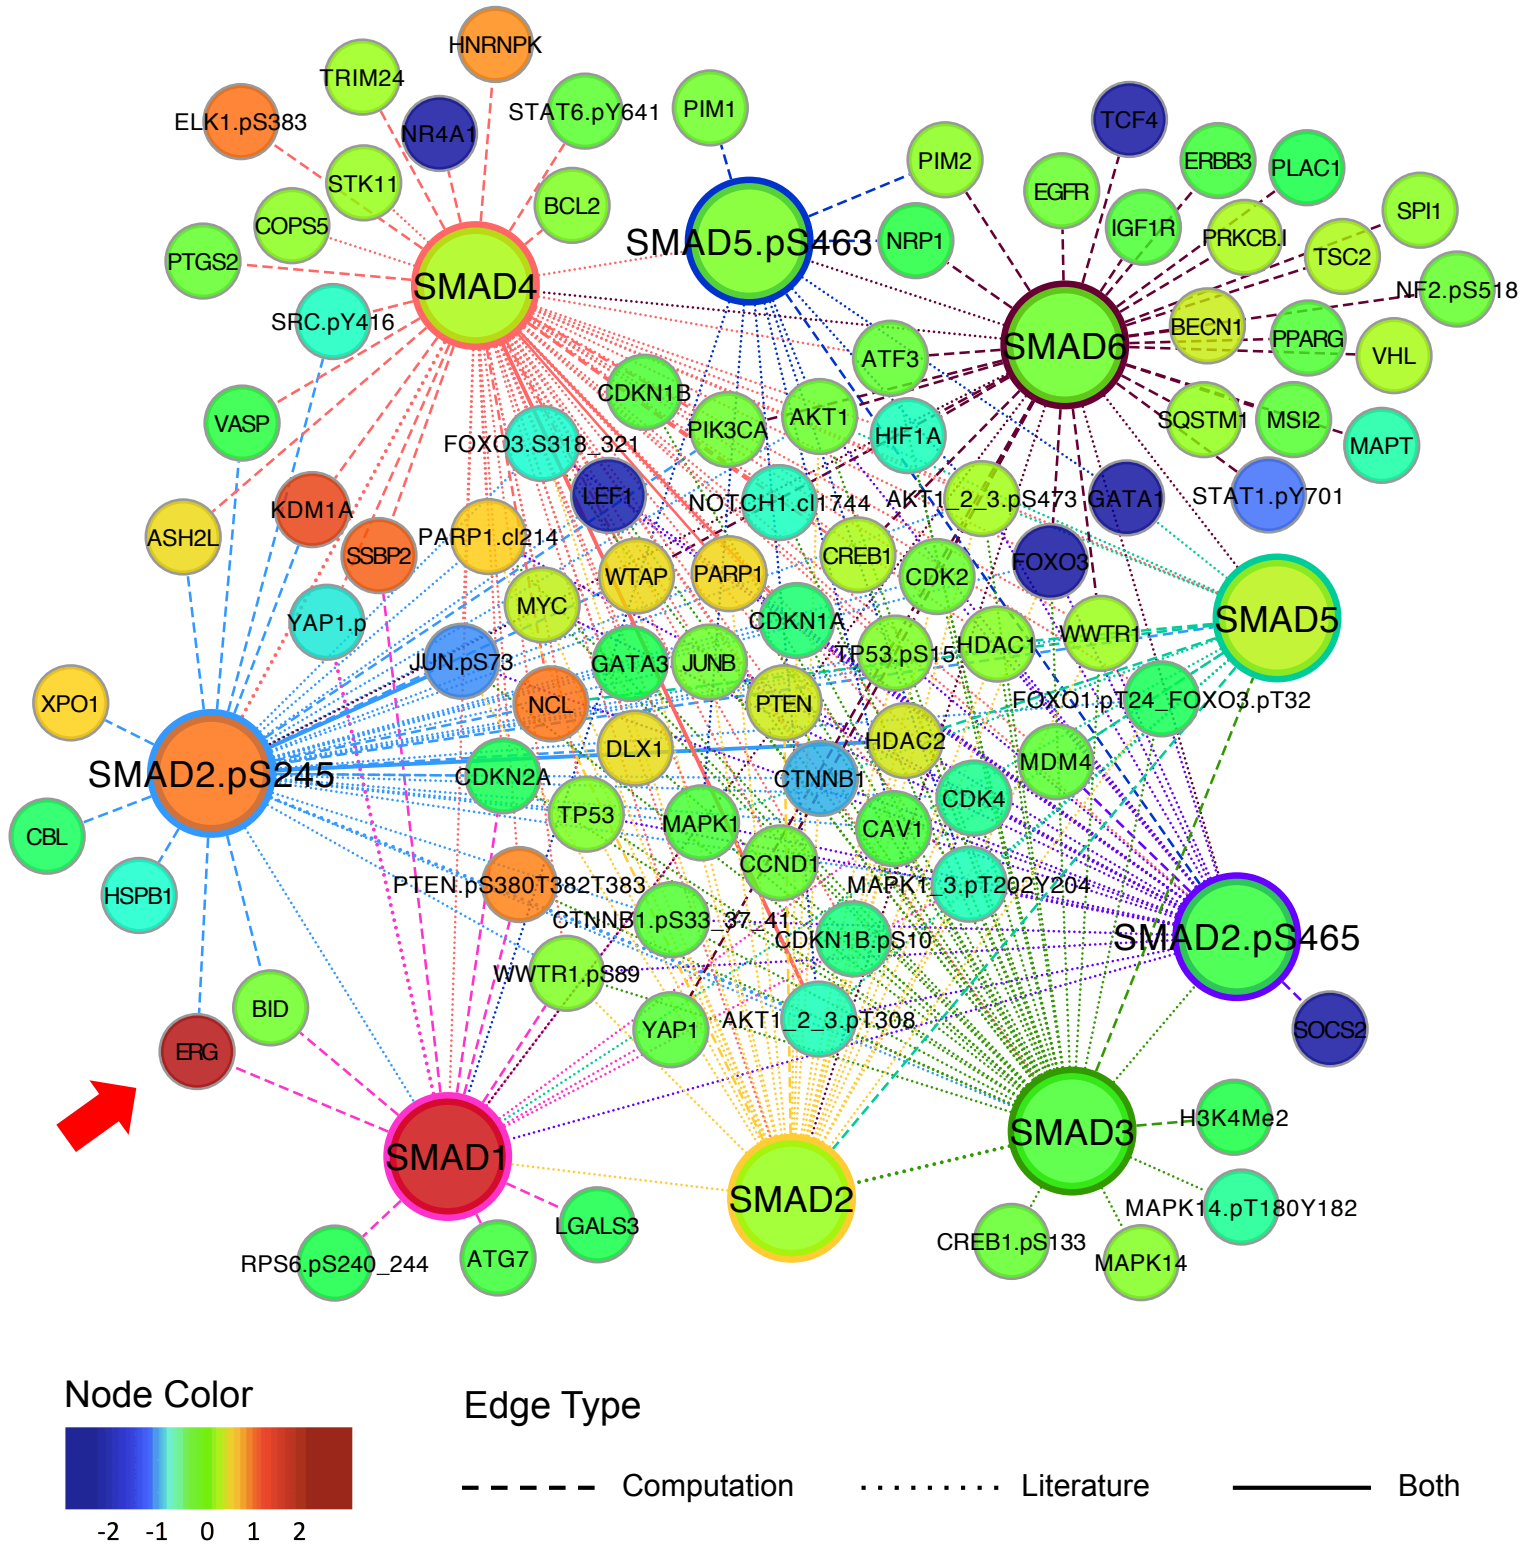

B

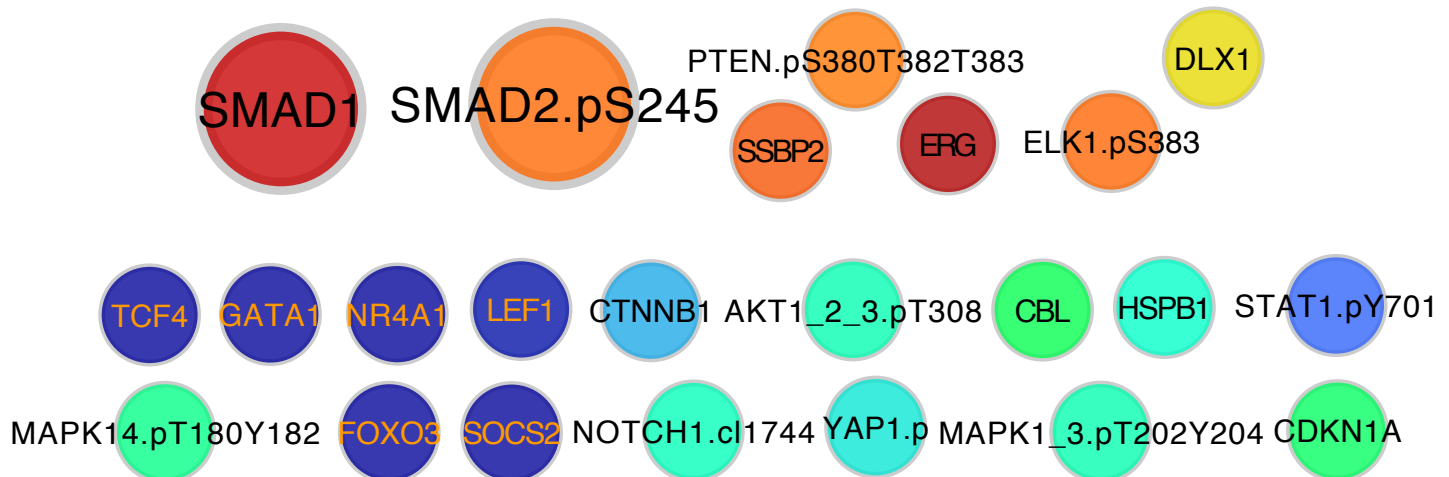

**Figure S3. Results from clustering patients based on protein expression levels.** (A) Clustering results of patients (columns) using k-means clustering, where proteins (rows) were ordered based on hierarchical clustering with ward linkage. (B) Patients' overall survival based on the k-means clustering memberships (p-value = 0.23). (C) Patients' remission duration based on the k-means clustering memberships (p-value = 0.4). (D) Clustering results using hierarchical clustering with ward linkage, where columns are patients and rows are proteins. (E) Patients' overall survival based on the hierarchical clustering memberships (p-value = 0.47). (F) Patients' remission duration based on the hierarchical clustering memberships (p-value = 0.42). The clusters identified by both k-means and hierarchical clustering are less prognostic in comparison to the clustering generated with the MetaGalaxy analysis (see **Figure 4**), in which the signatures are prognostic for overall survival (p-value = 0.00009) and remission duration (p-value = 0.03). n = 205 for all graphs. p-values shown for log-rank test, one-sided.

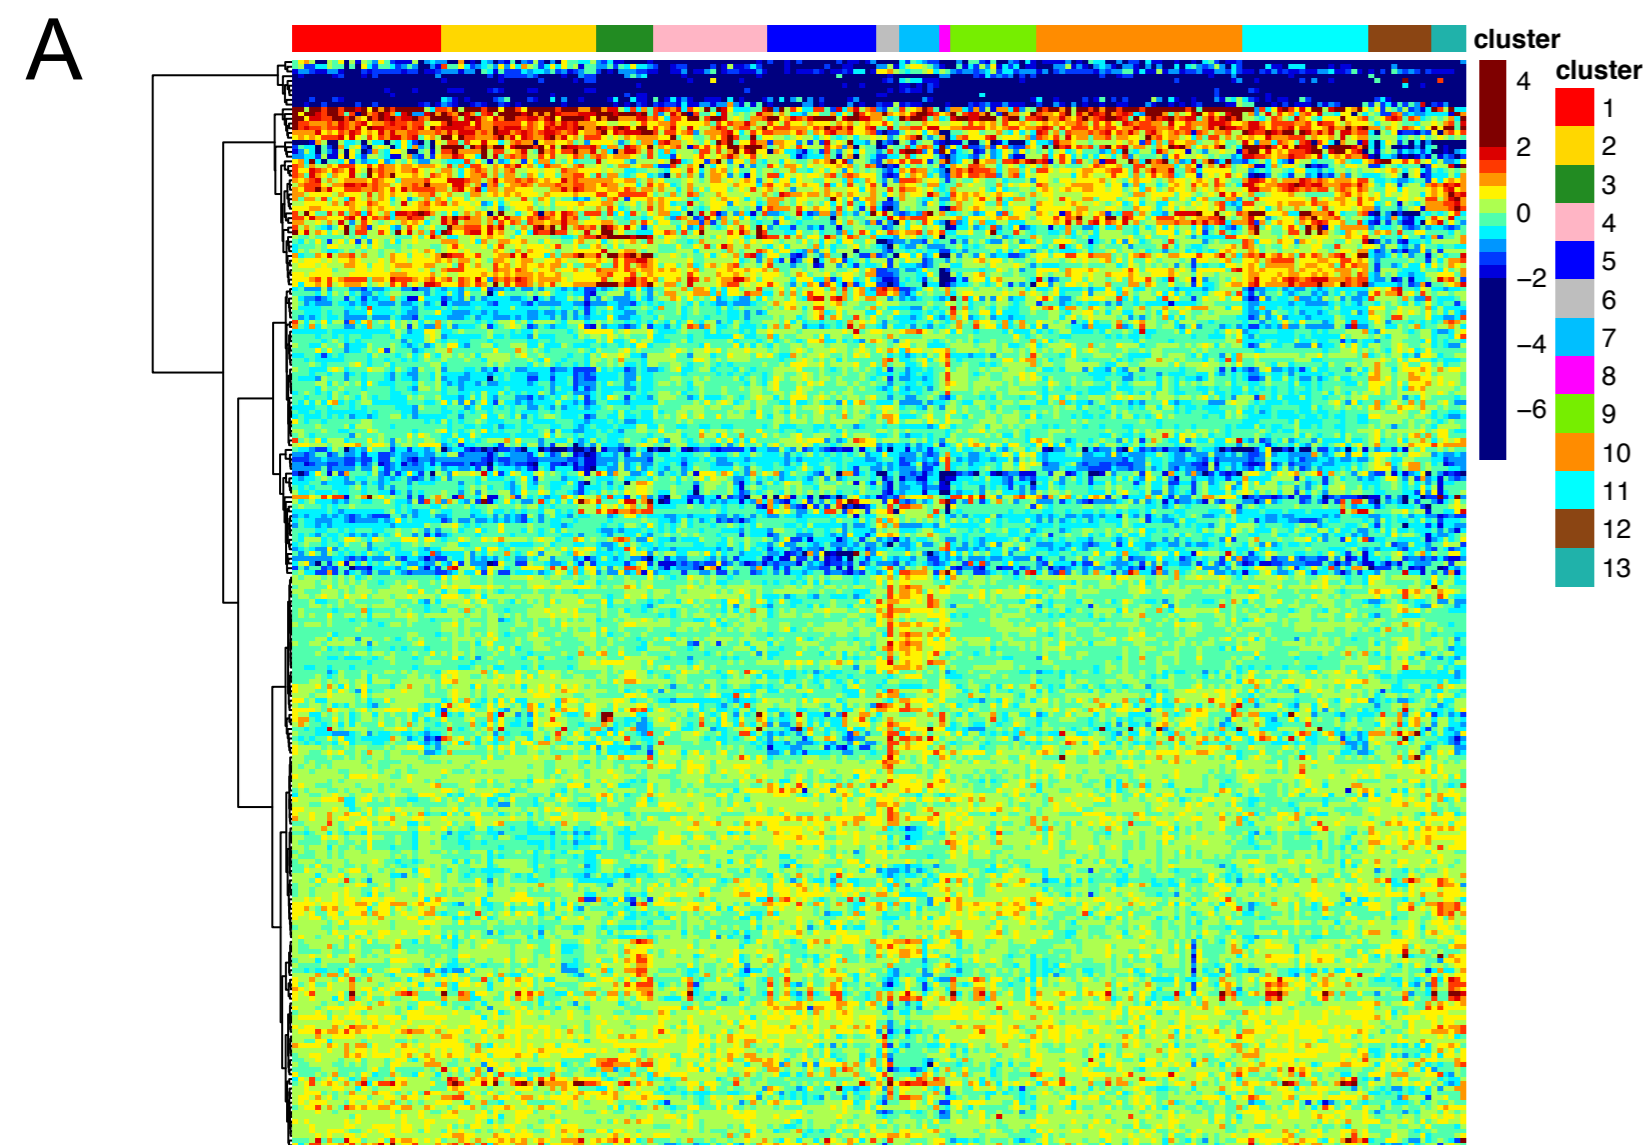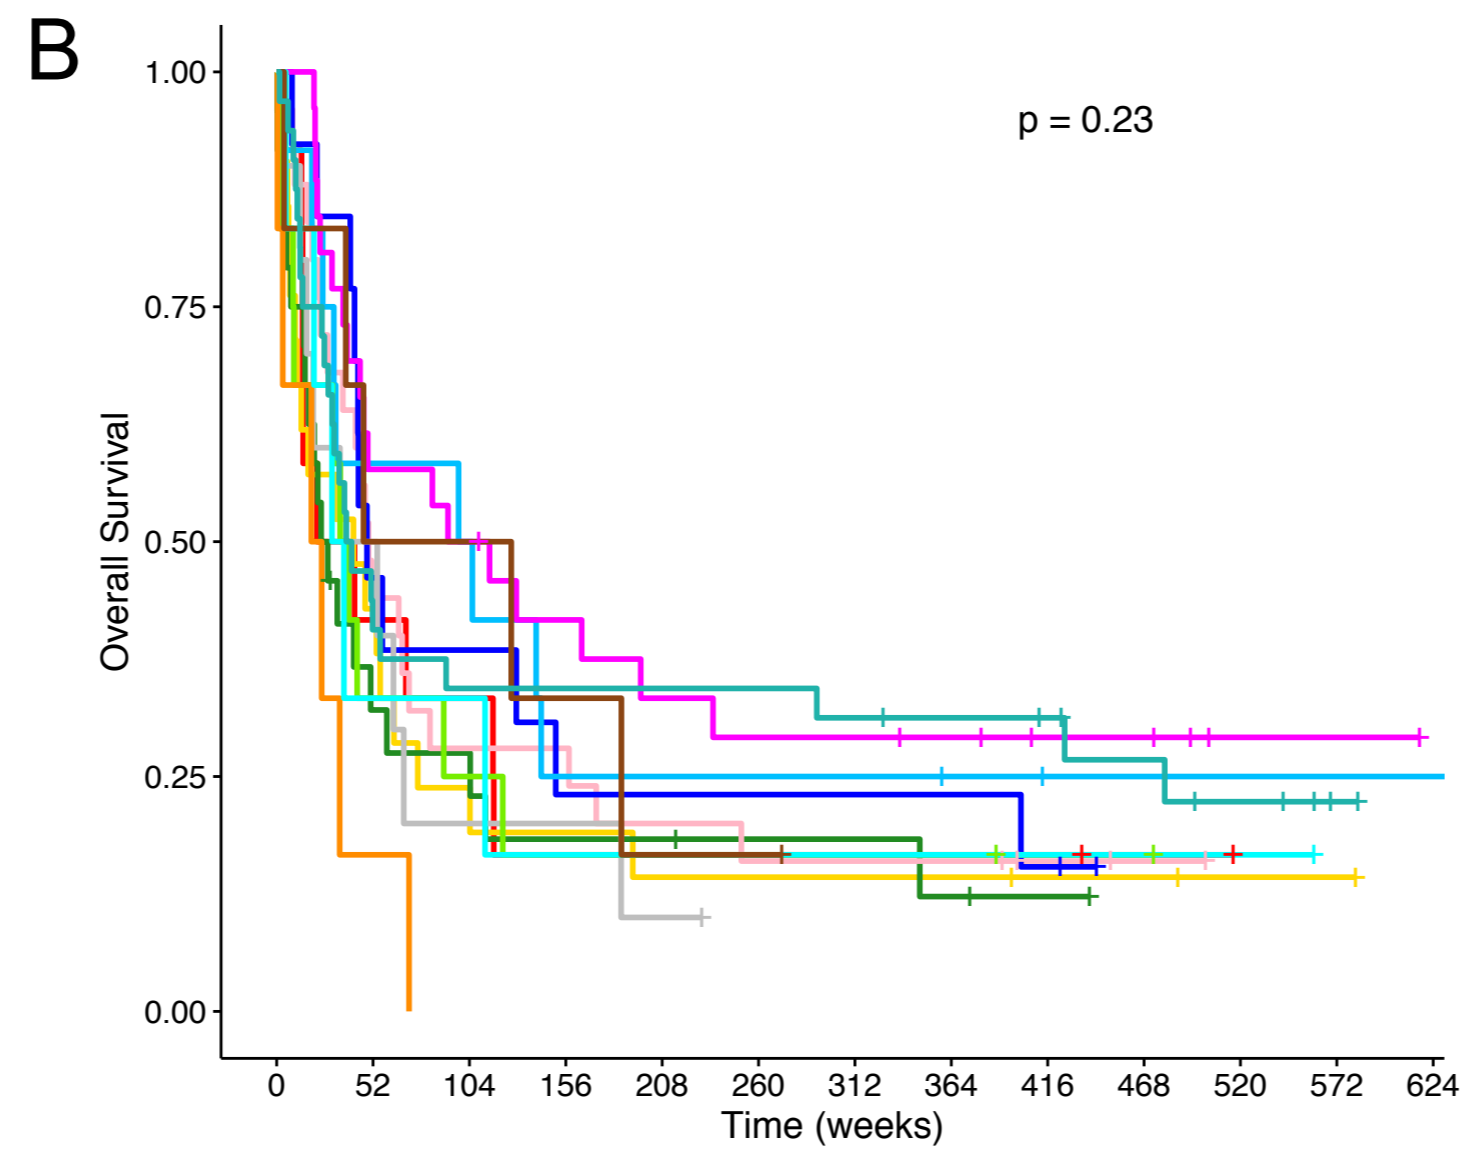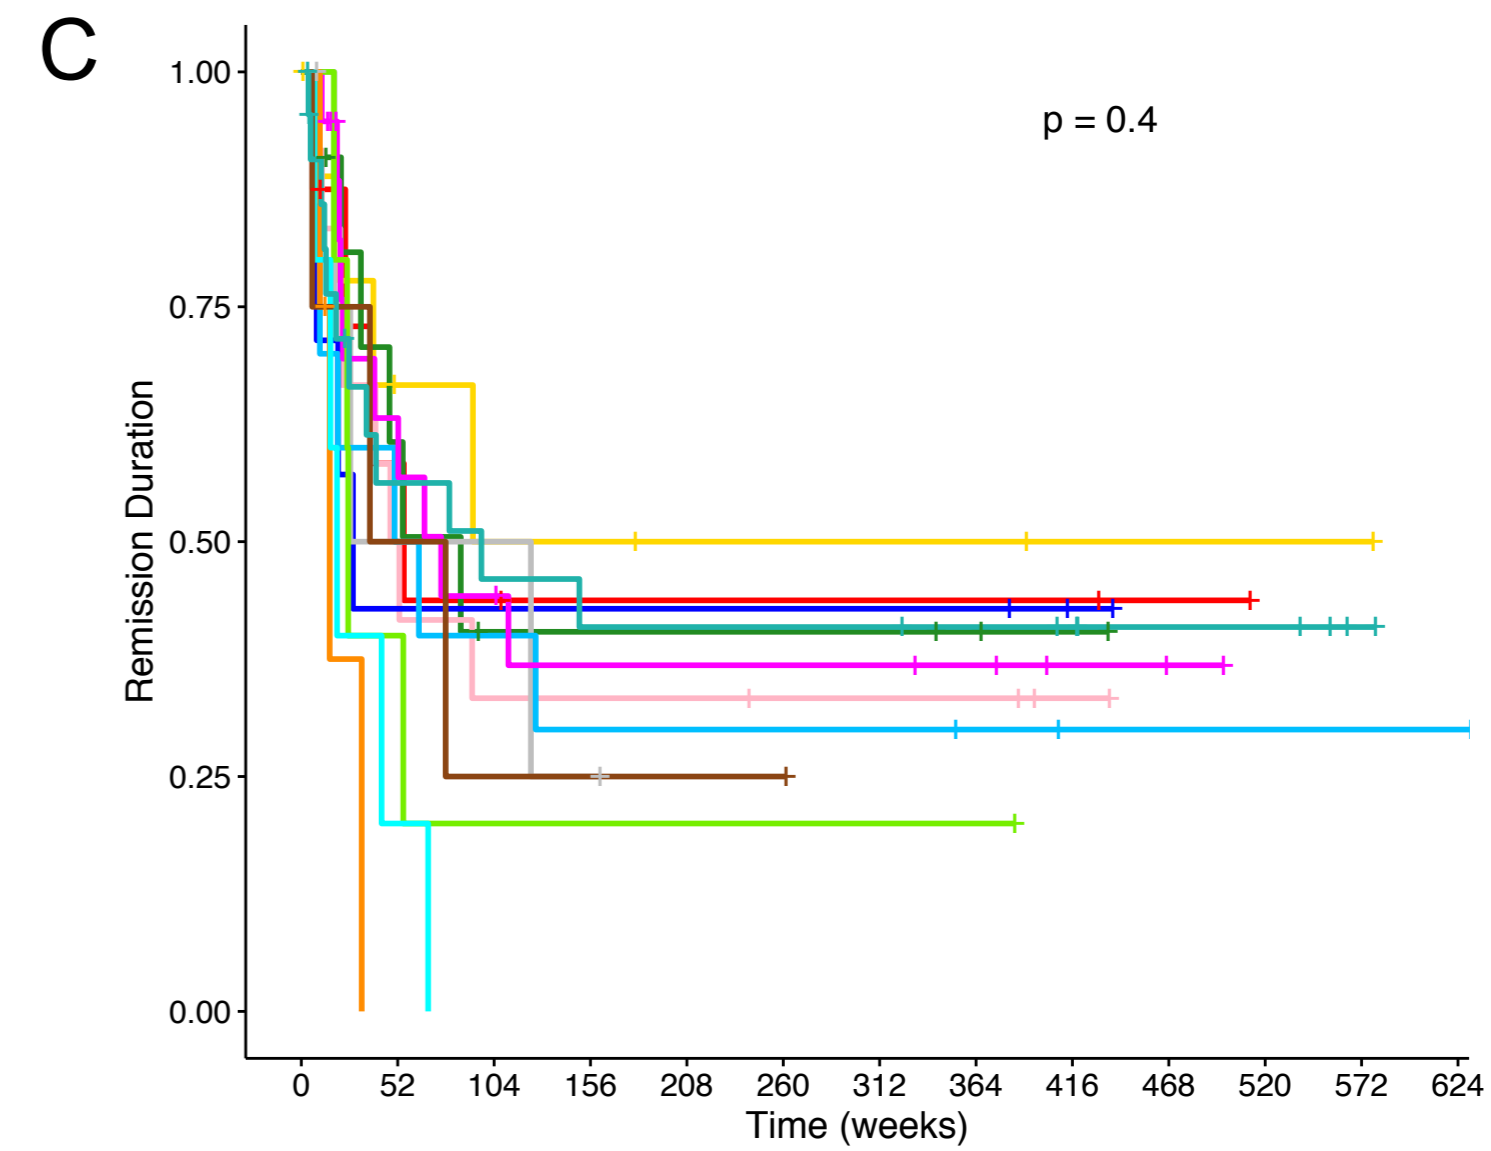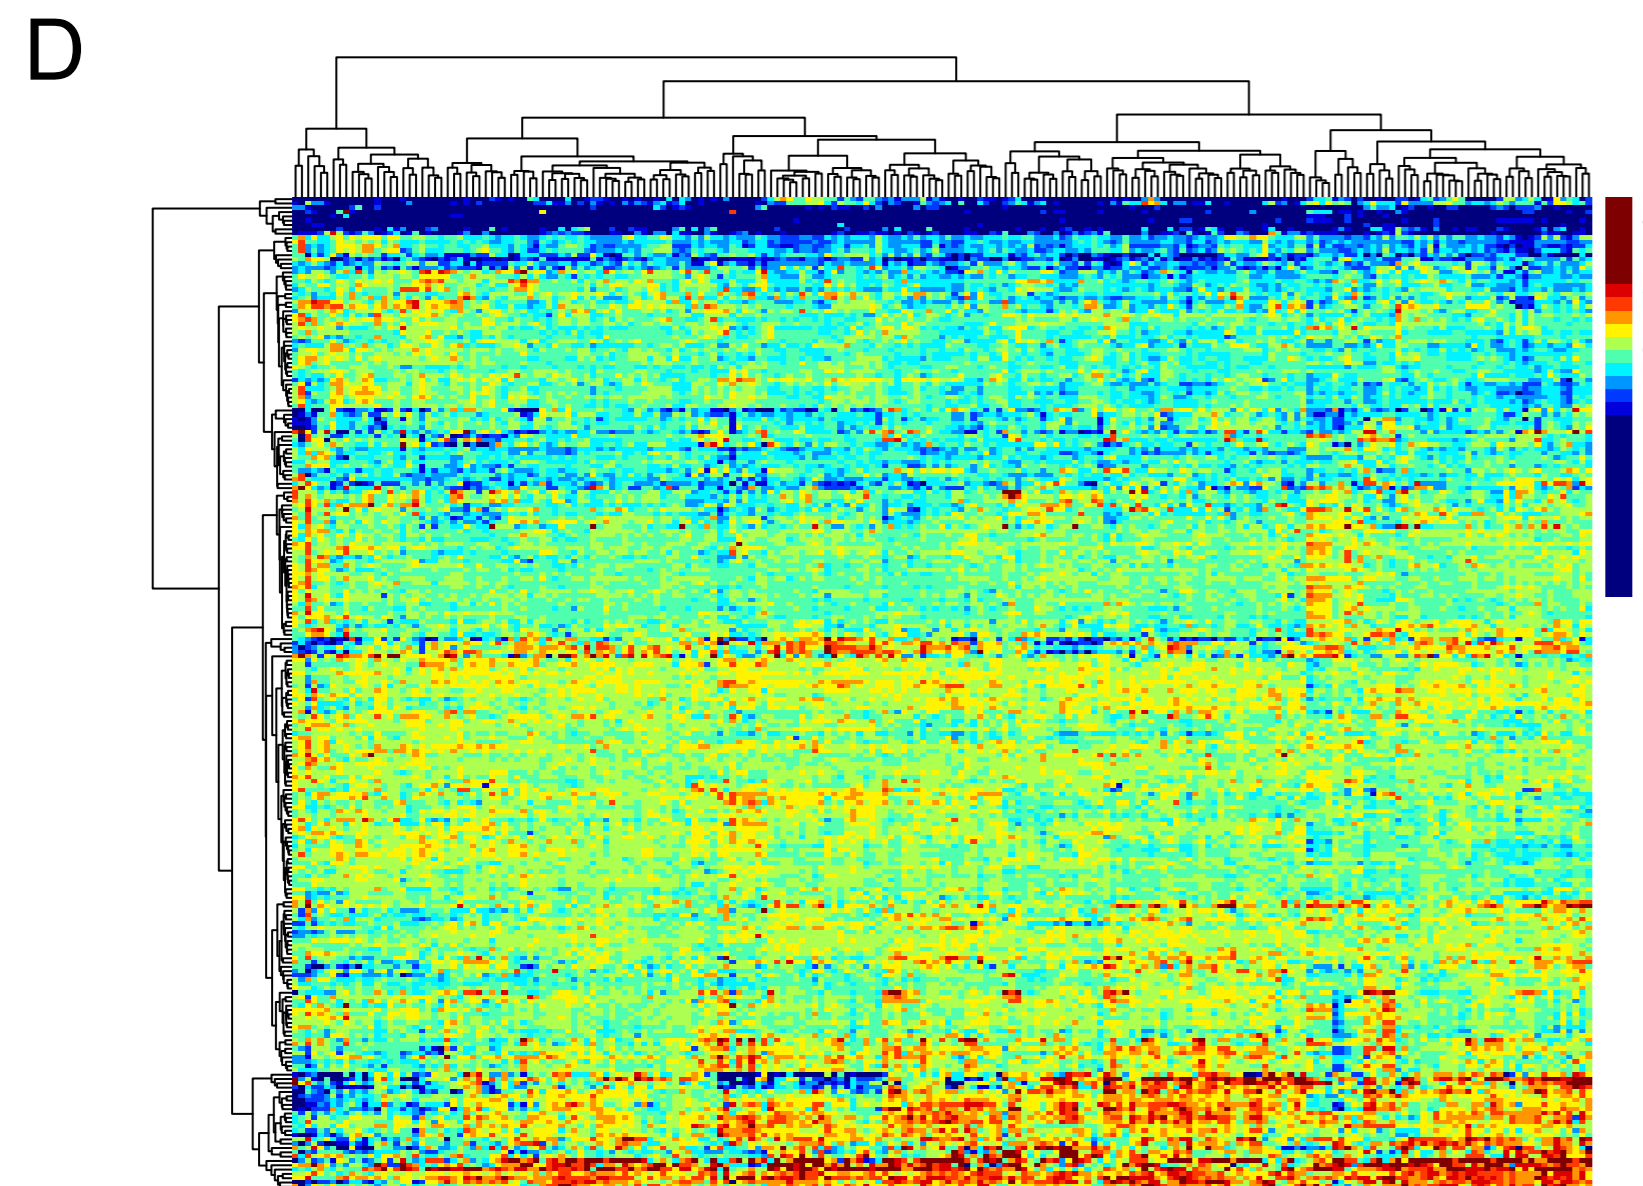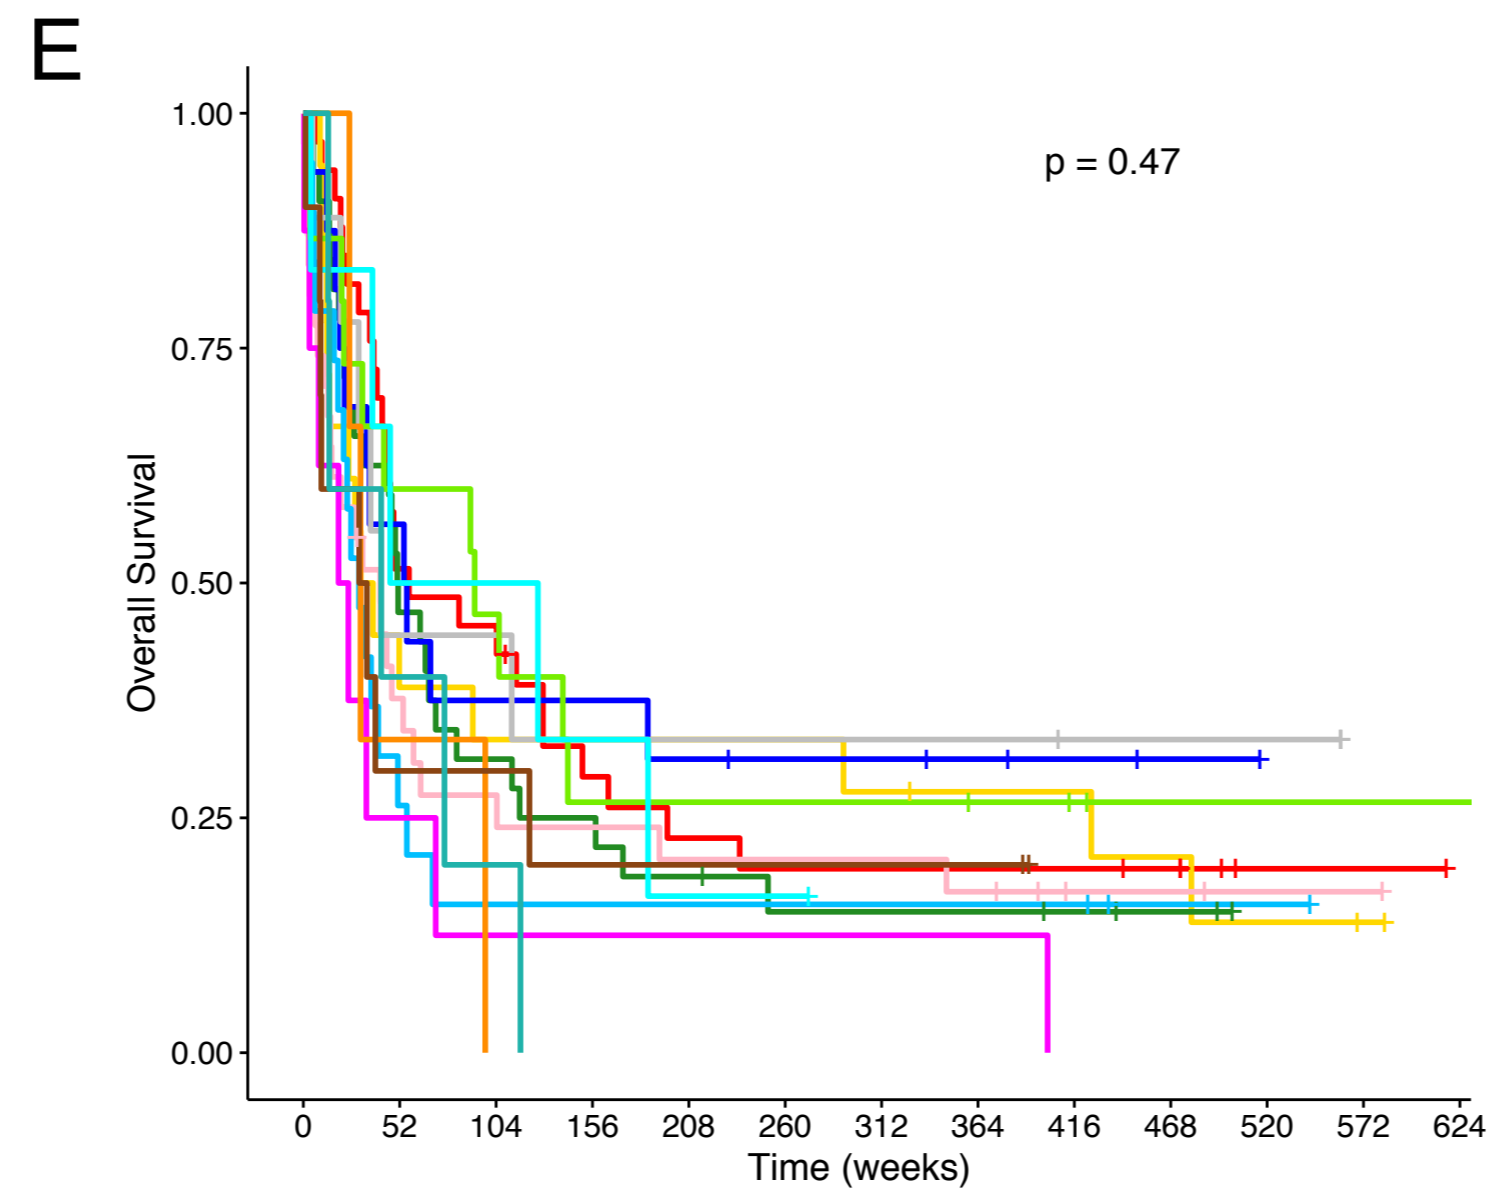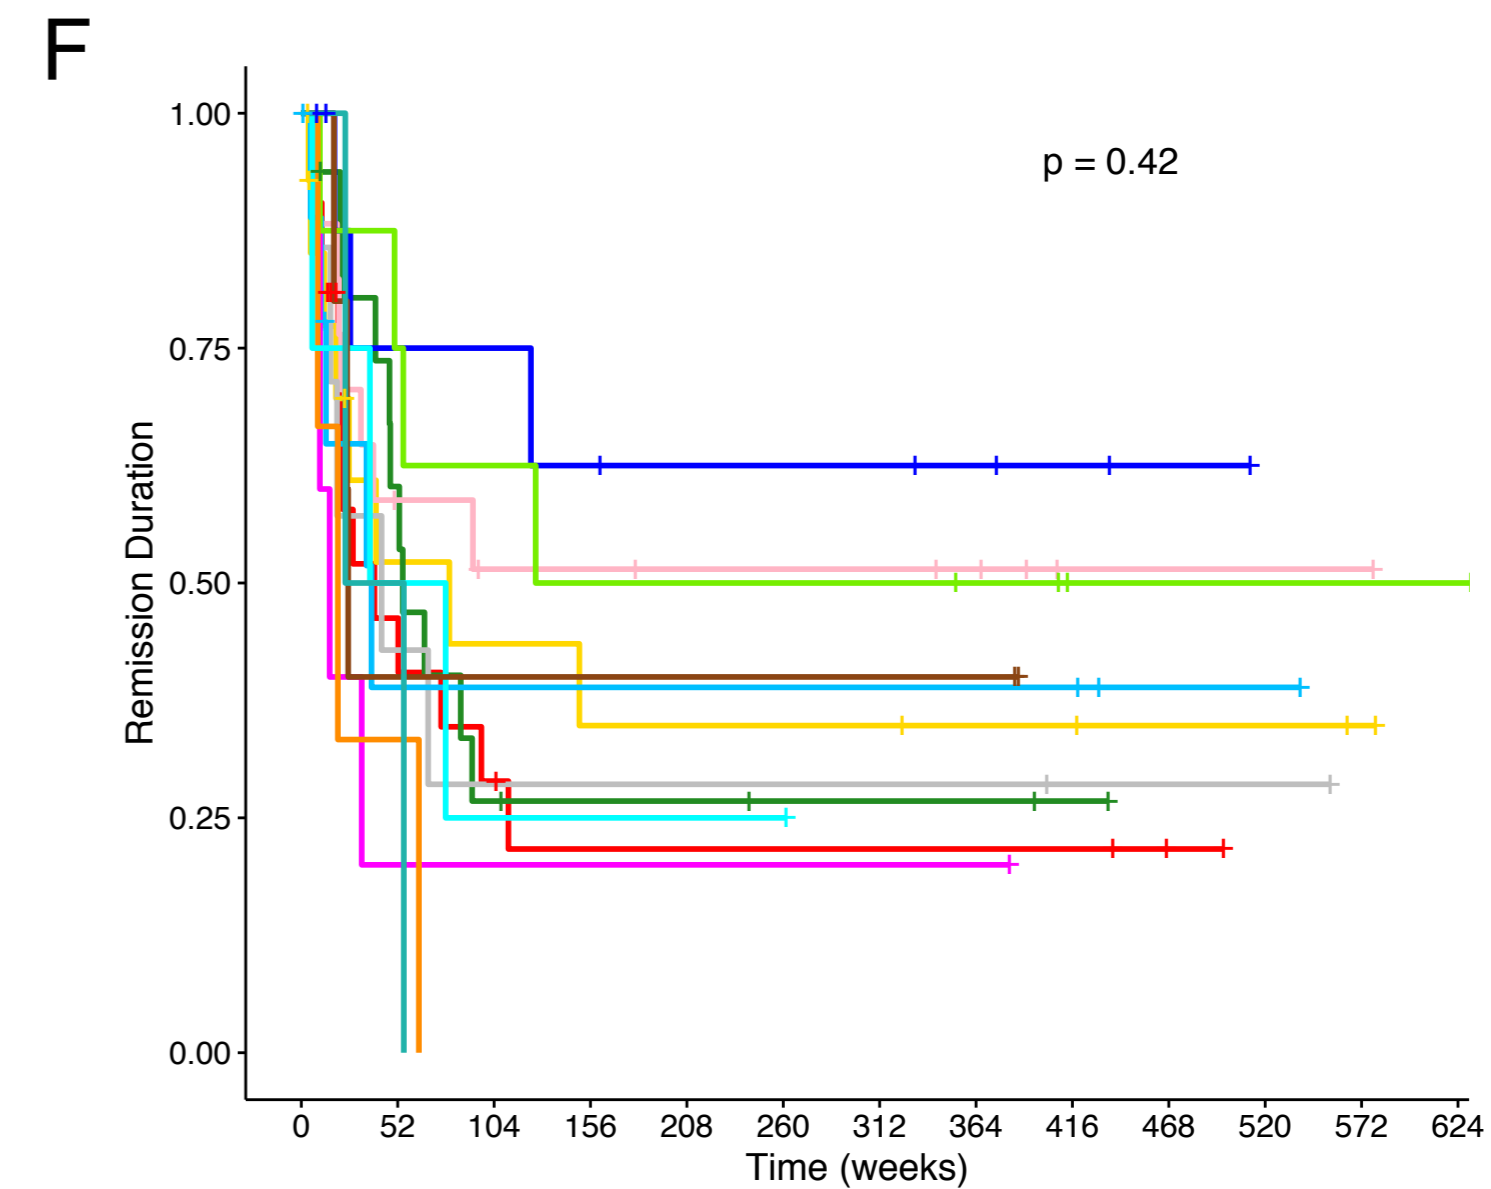

**Figure S4. Kaplan-Meier curves from training and testing data.** The four plots display overall survival curves from the training set (upper left), overall survival curves from the testing set (upper right), remission duration curves from the training set (lower left) and remission duration curves from the testing set (lower right). In either overall survival or remission duration, the three signature groups (favorable, intermediate and unfavorable) display consistent outcome between the training and the testing set. Training sample size (n = 102); testing samples size (n = 103). p-values shown for log-rank test, one-sided.





**Figure S5. Potential drug targets for signatures.** The heatmap shows the mean expression levels of potential drug targets (rows) in each signature (columns). A cell is marked in grey if the protein is not a target in that signature. Note that only proteins that are targets for at least one signature are included, and proteins that are not targets for any of the signatures are excluded. The signature color at the top corresponds to the signature color in **Figure 4A**.

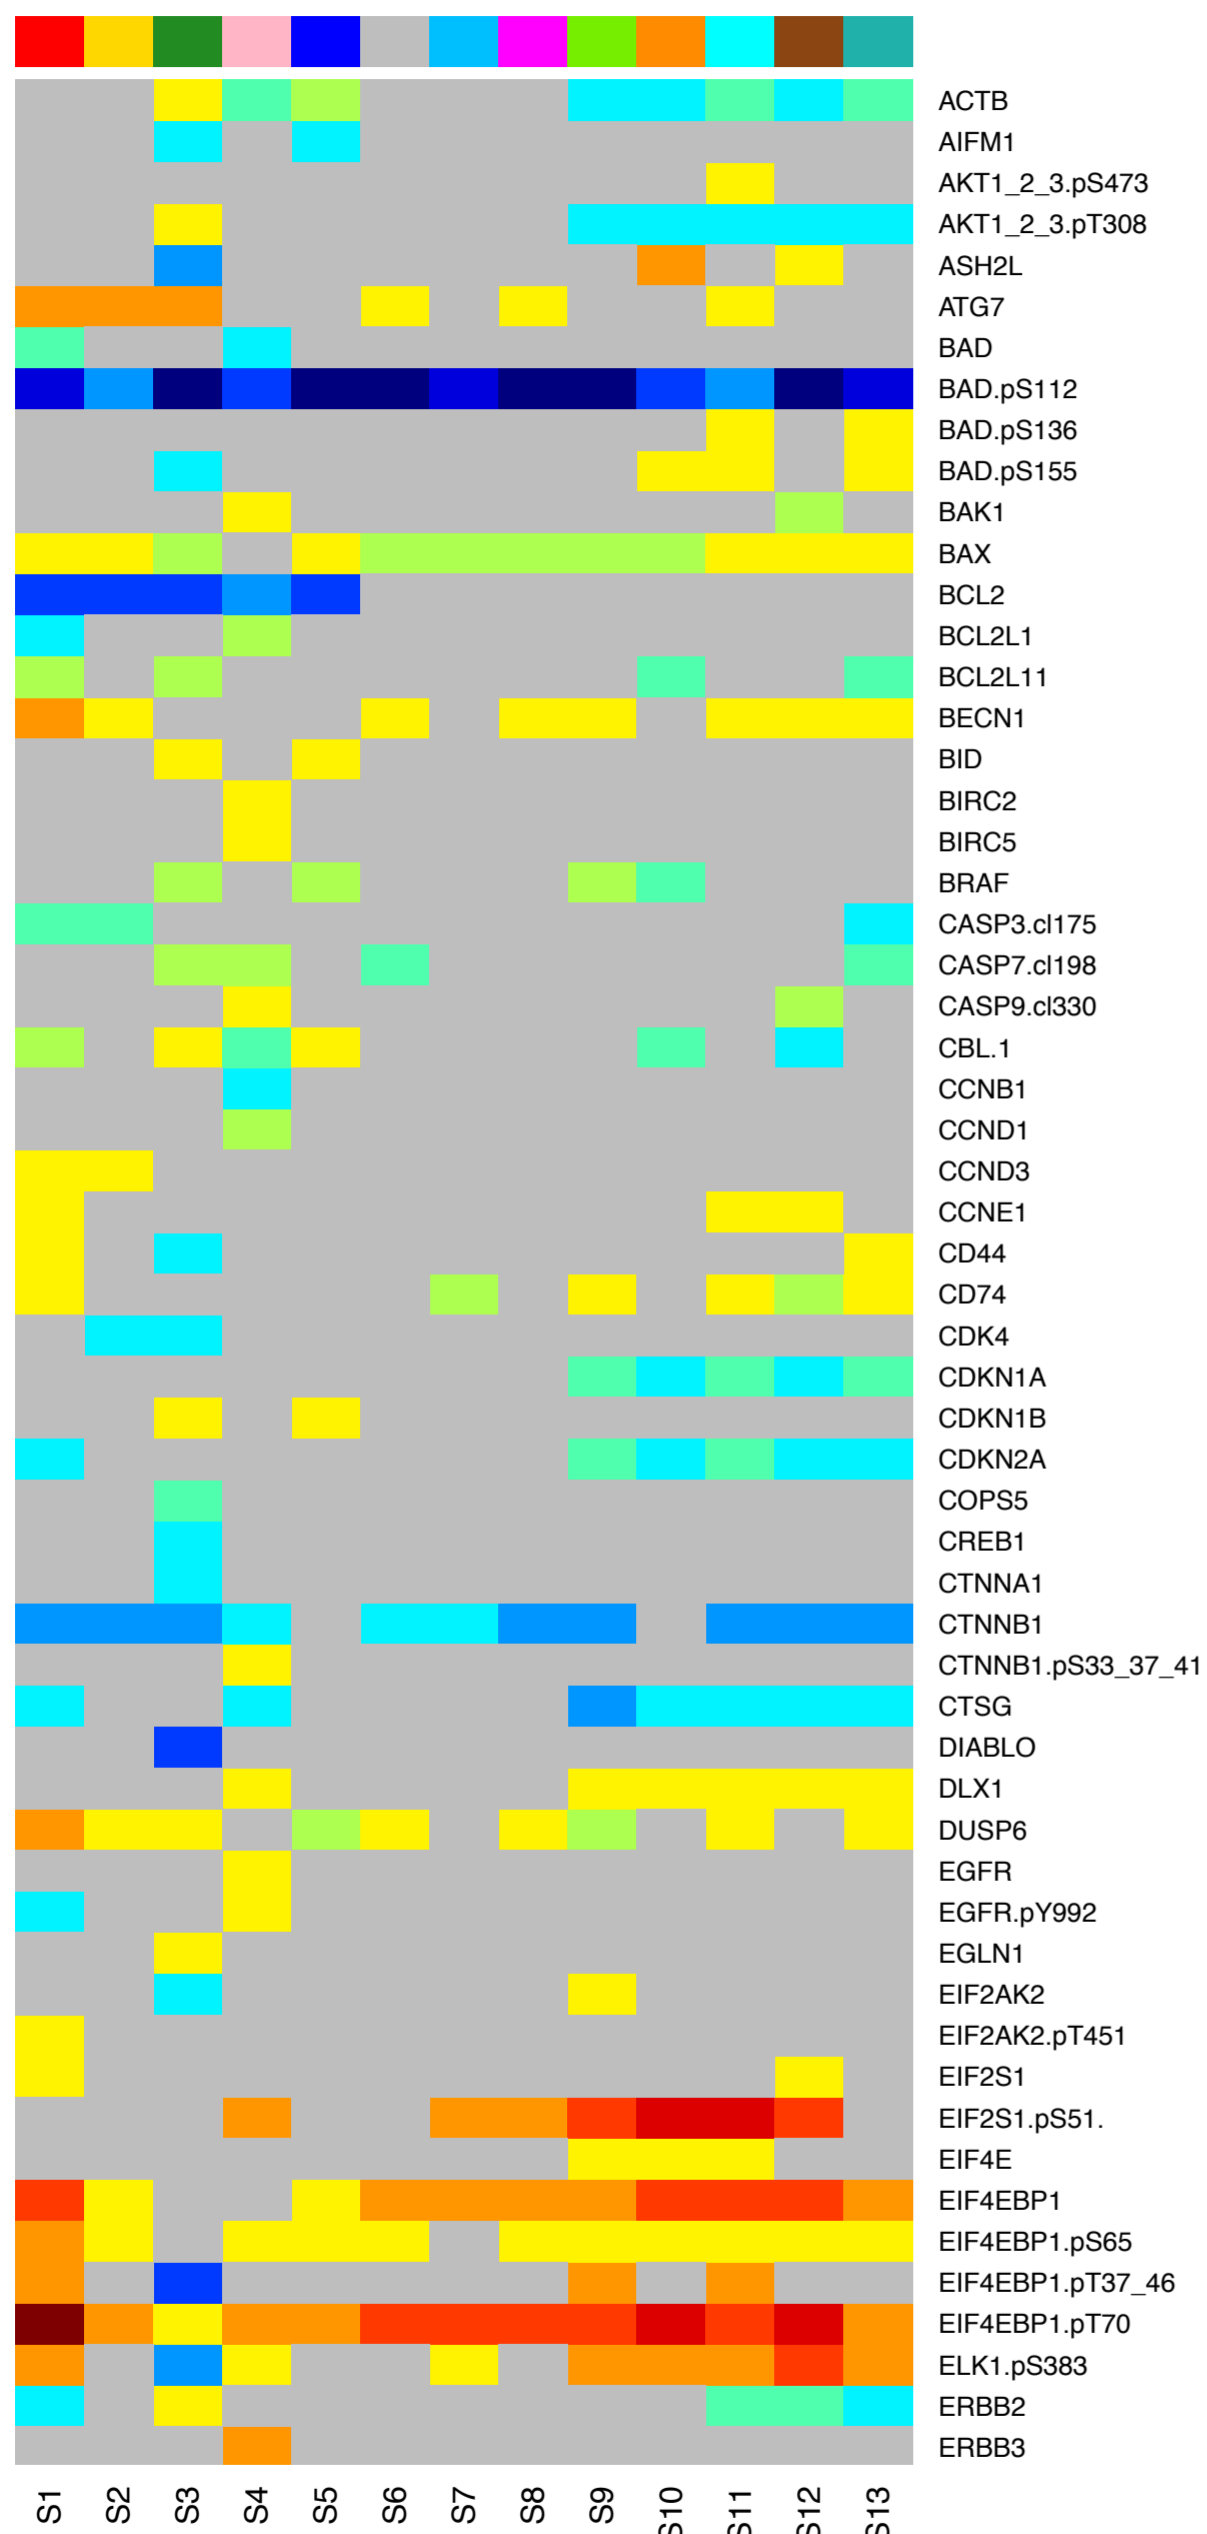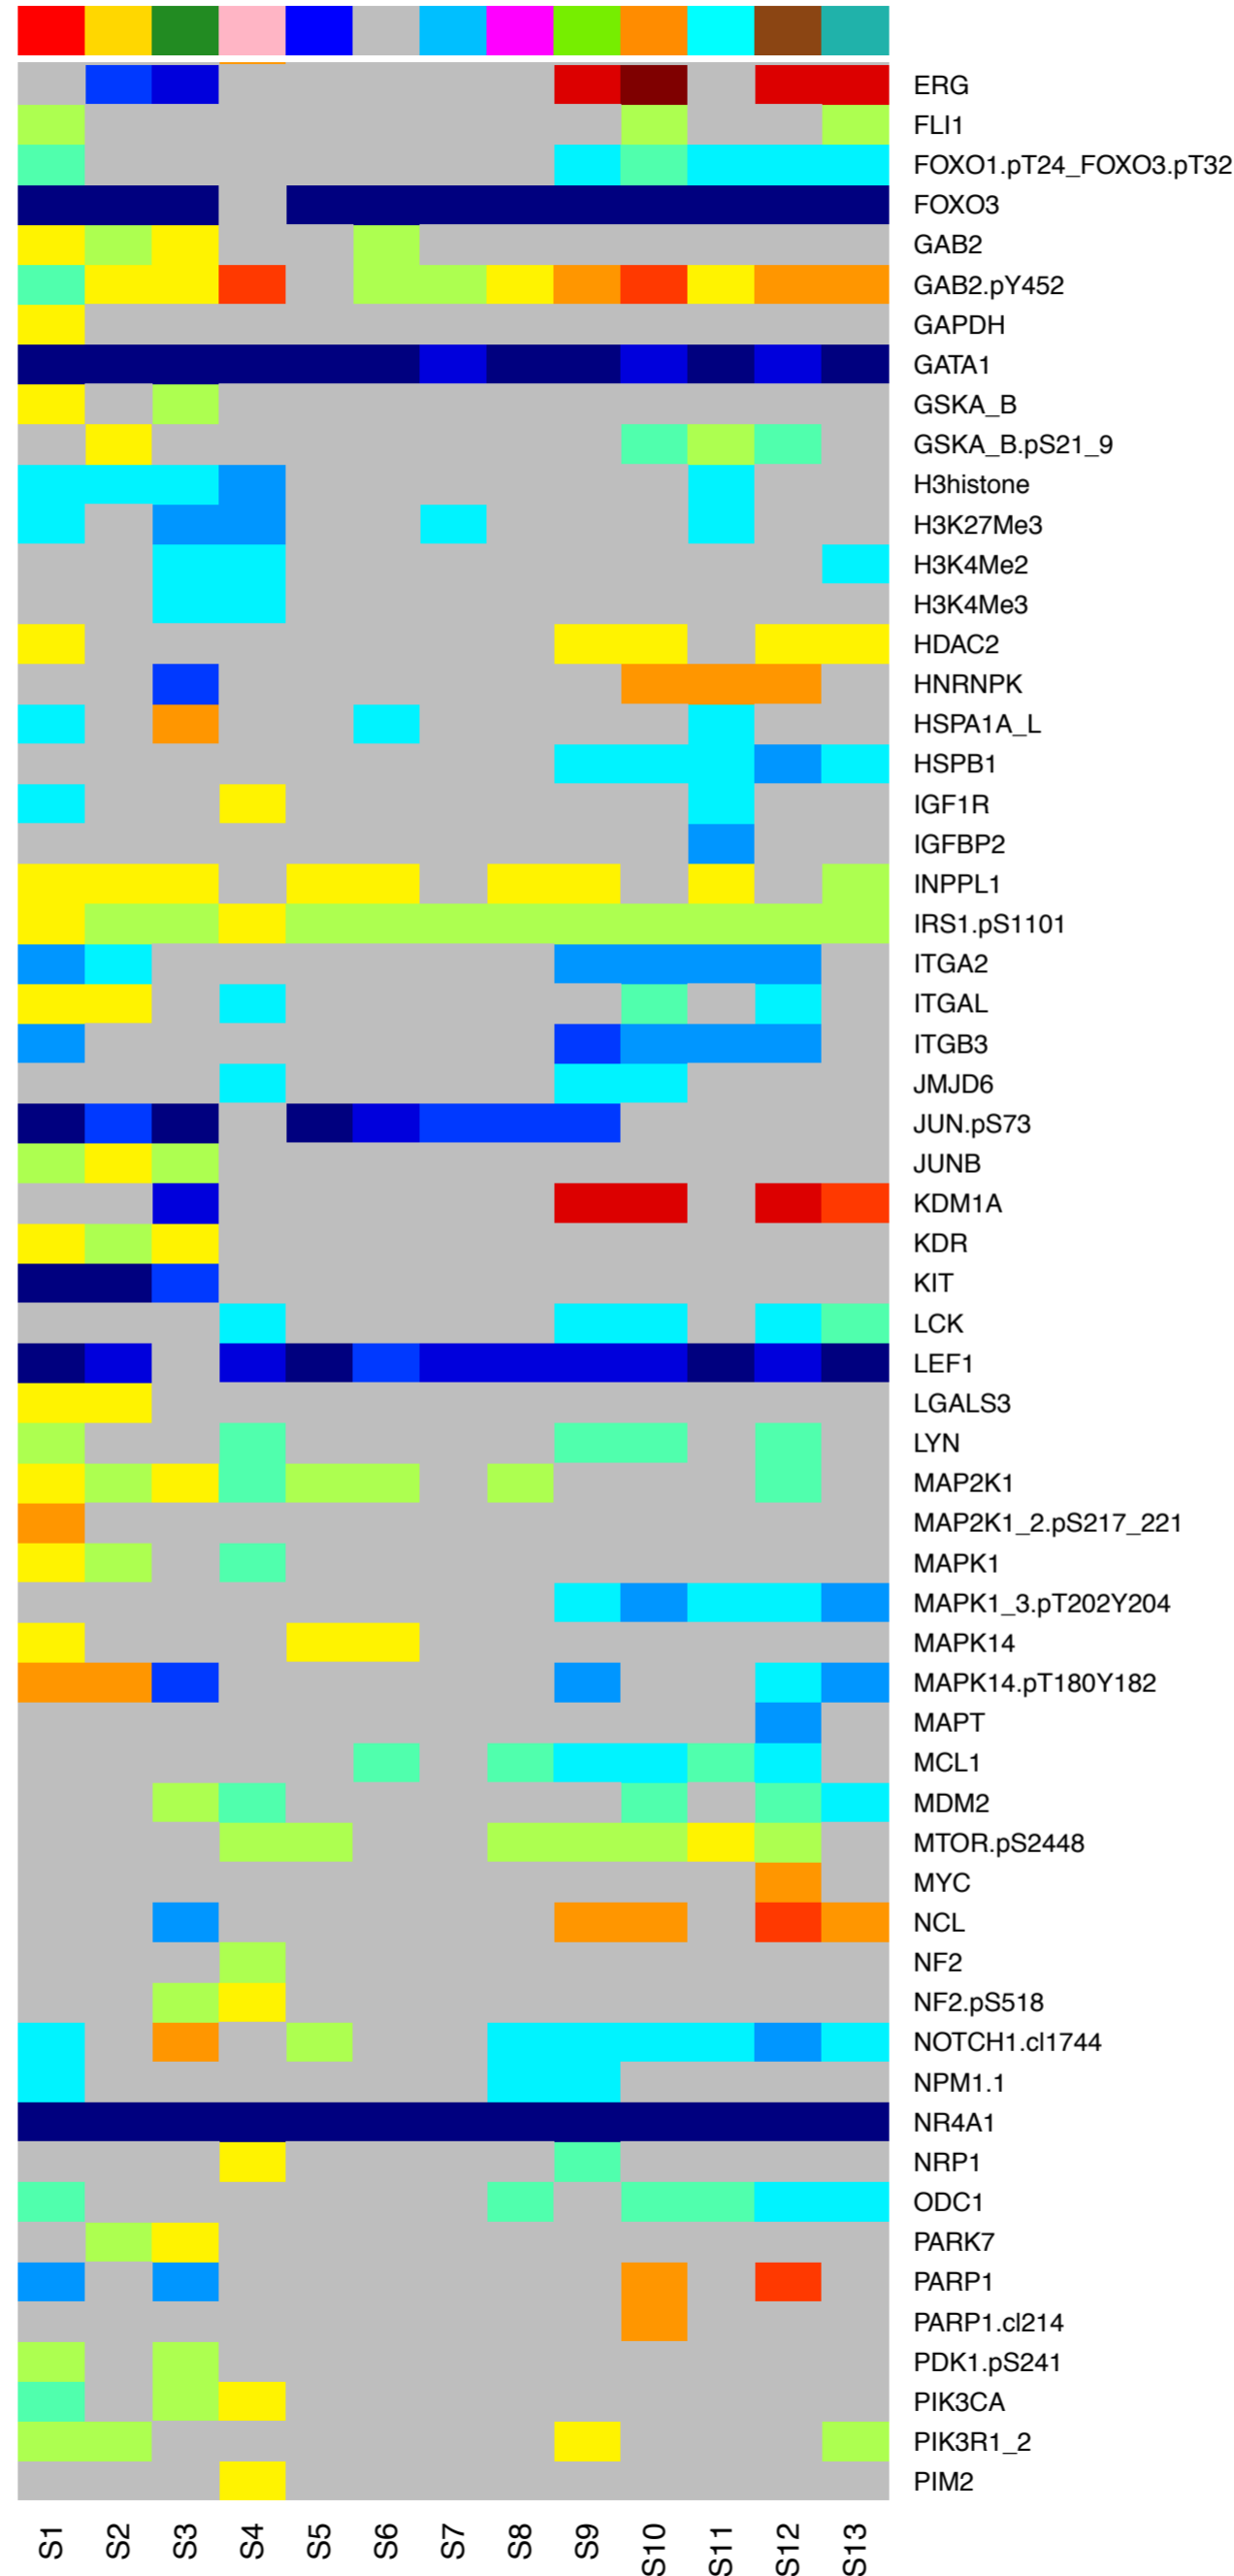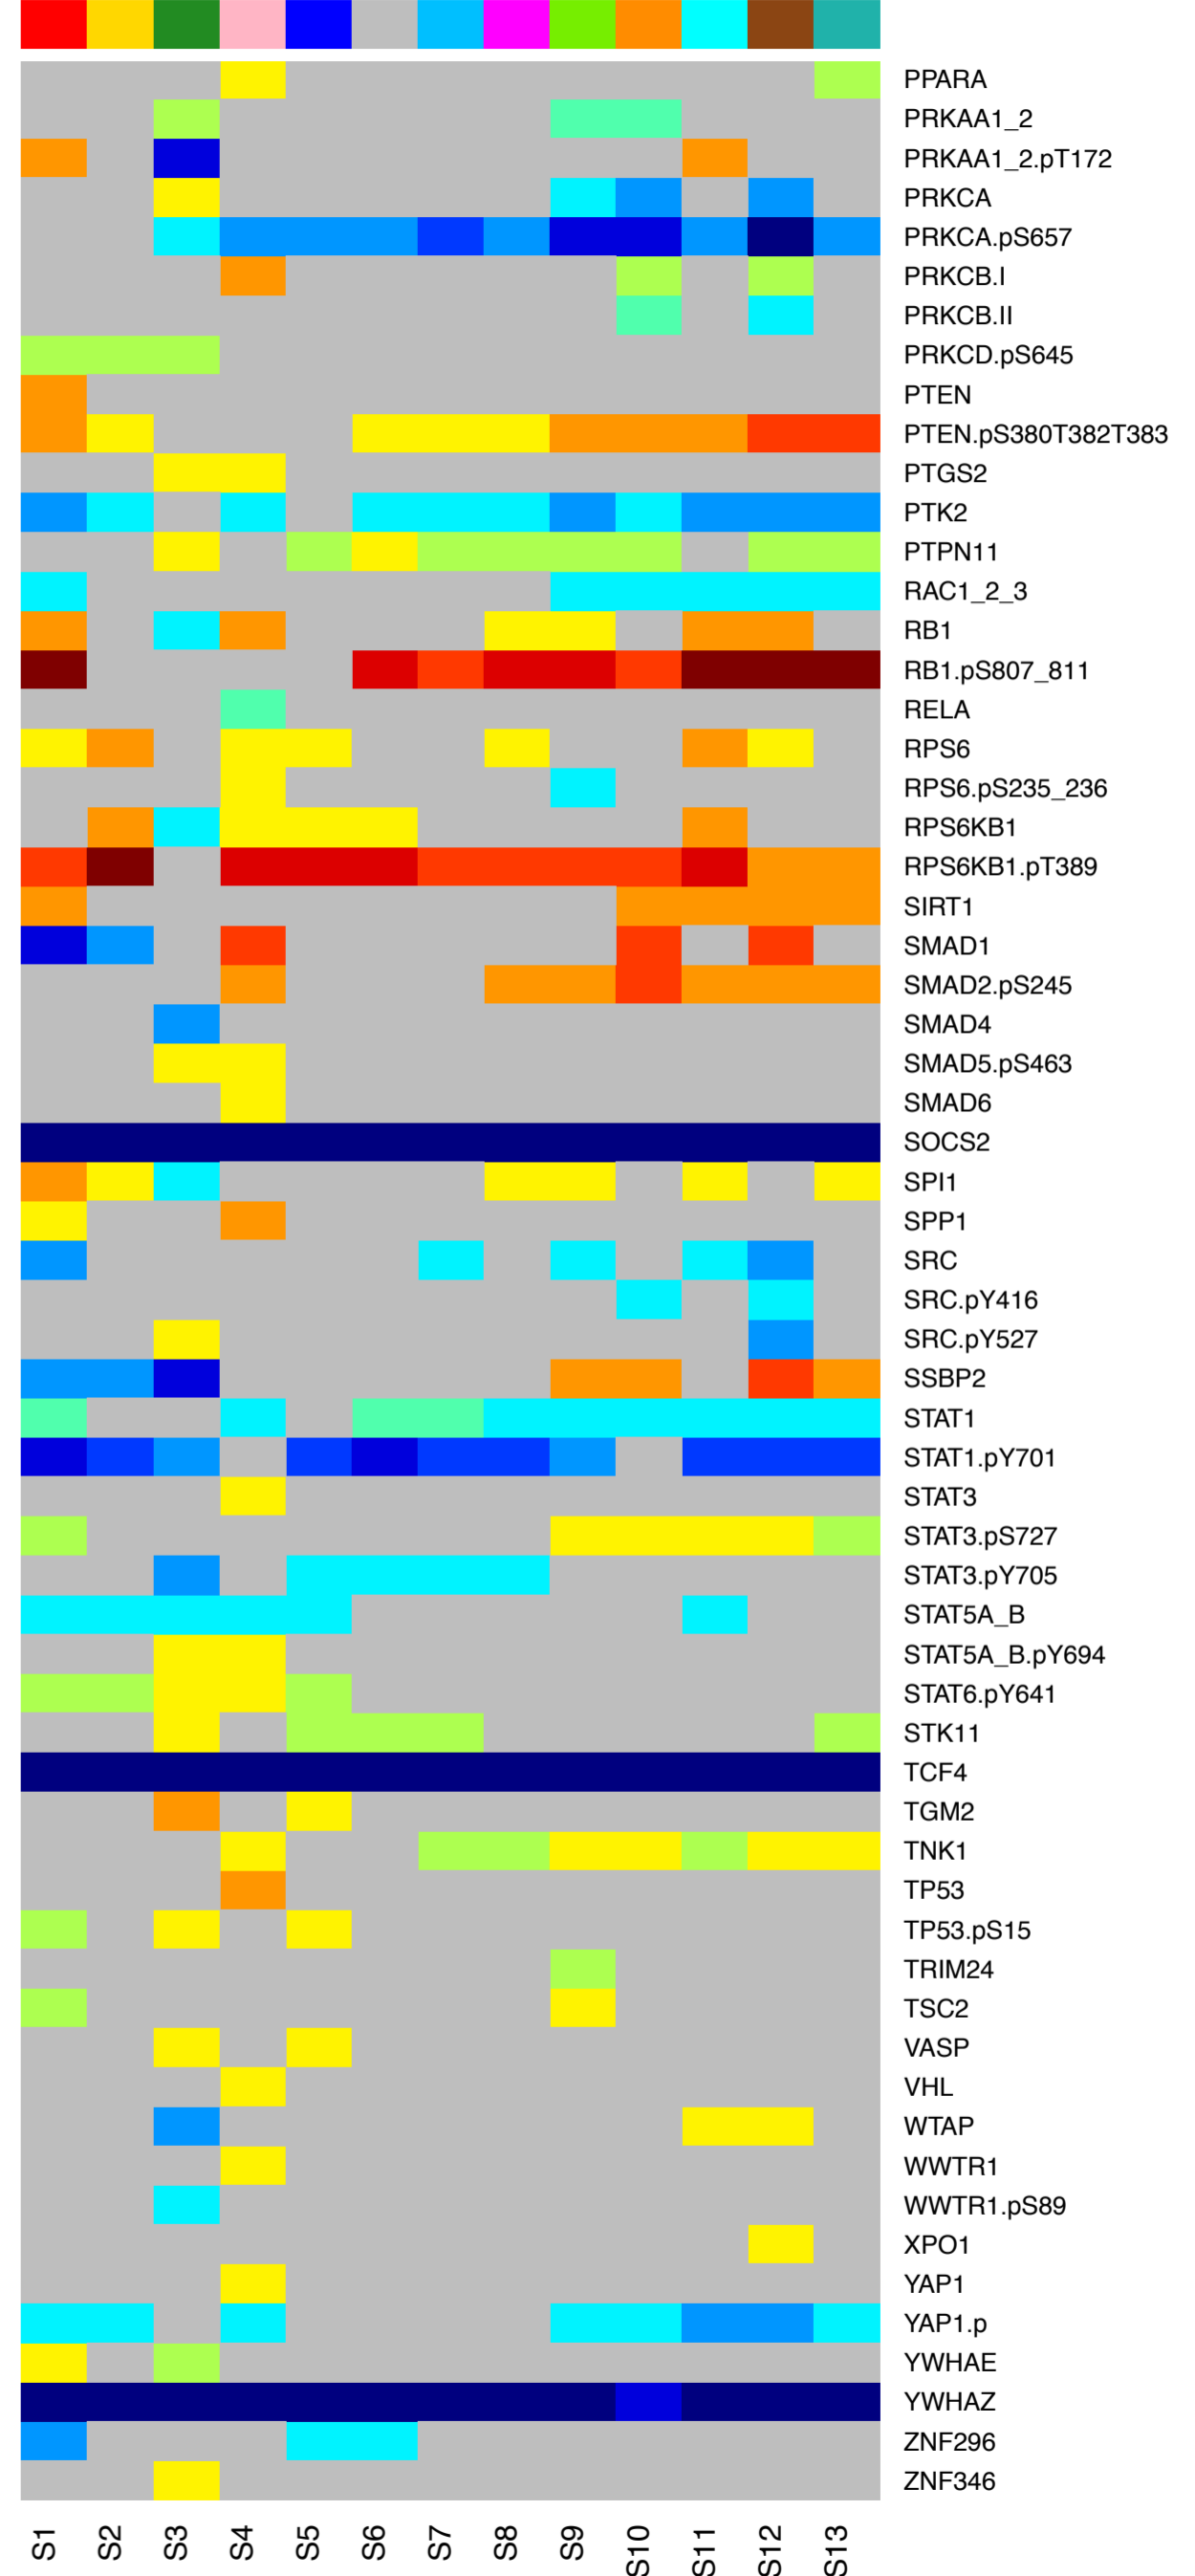

**Figure S6. Clustering of cell lines together with AML patient samples.** In the heatmap, the columns are proteins and the rows are samples. To distinguish cell lines from patients, we labeled all cell lines (text at the right of the heatmap), whereas we kept all patient samples unlabeled. Hierarchical clustering was applied to both the rows and columns, and the proteins and samples were ordered by the clustering result. It is clear that all cell lines (at the bottom) were separated from all patient samples (at the top) from the clustering. This was true for all the cell lines, regardless of lineage (AML or ALL), or for mycoplasma infected cell lines (n=17) and their uninfected counterparts.

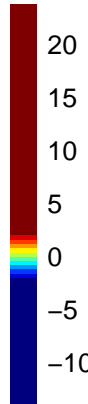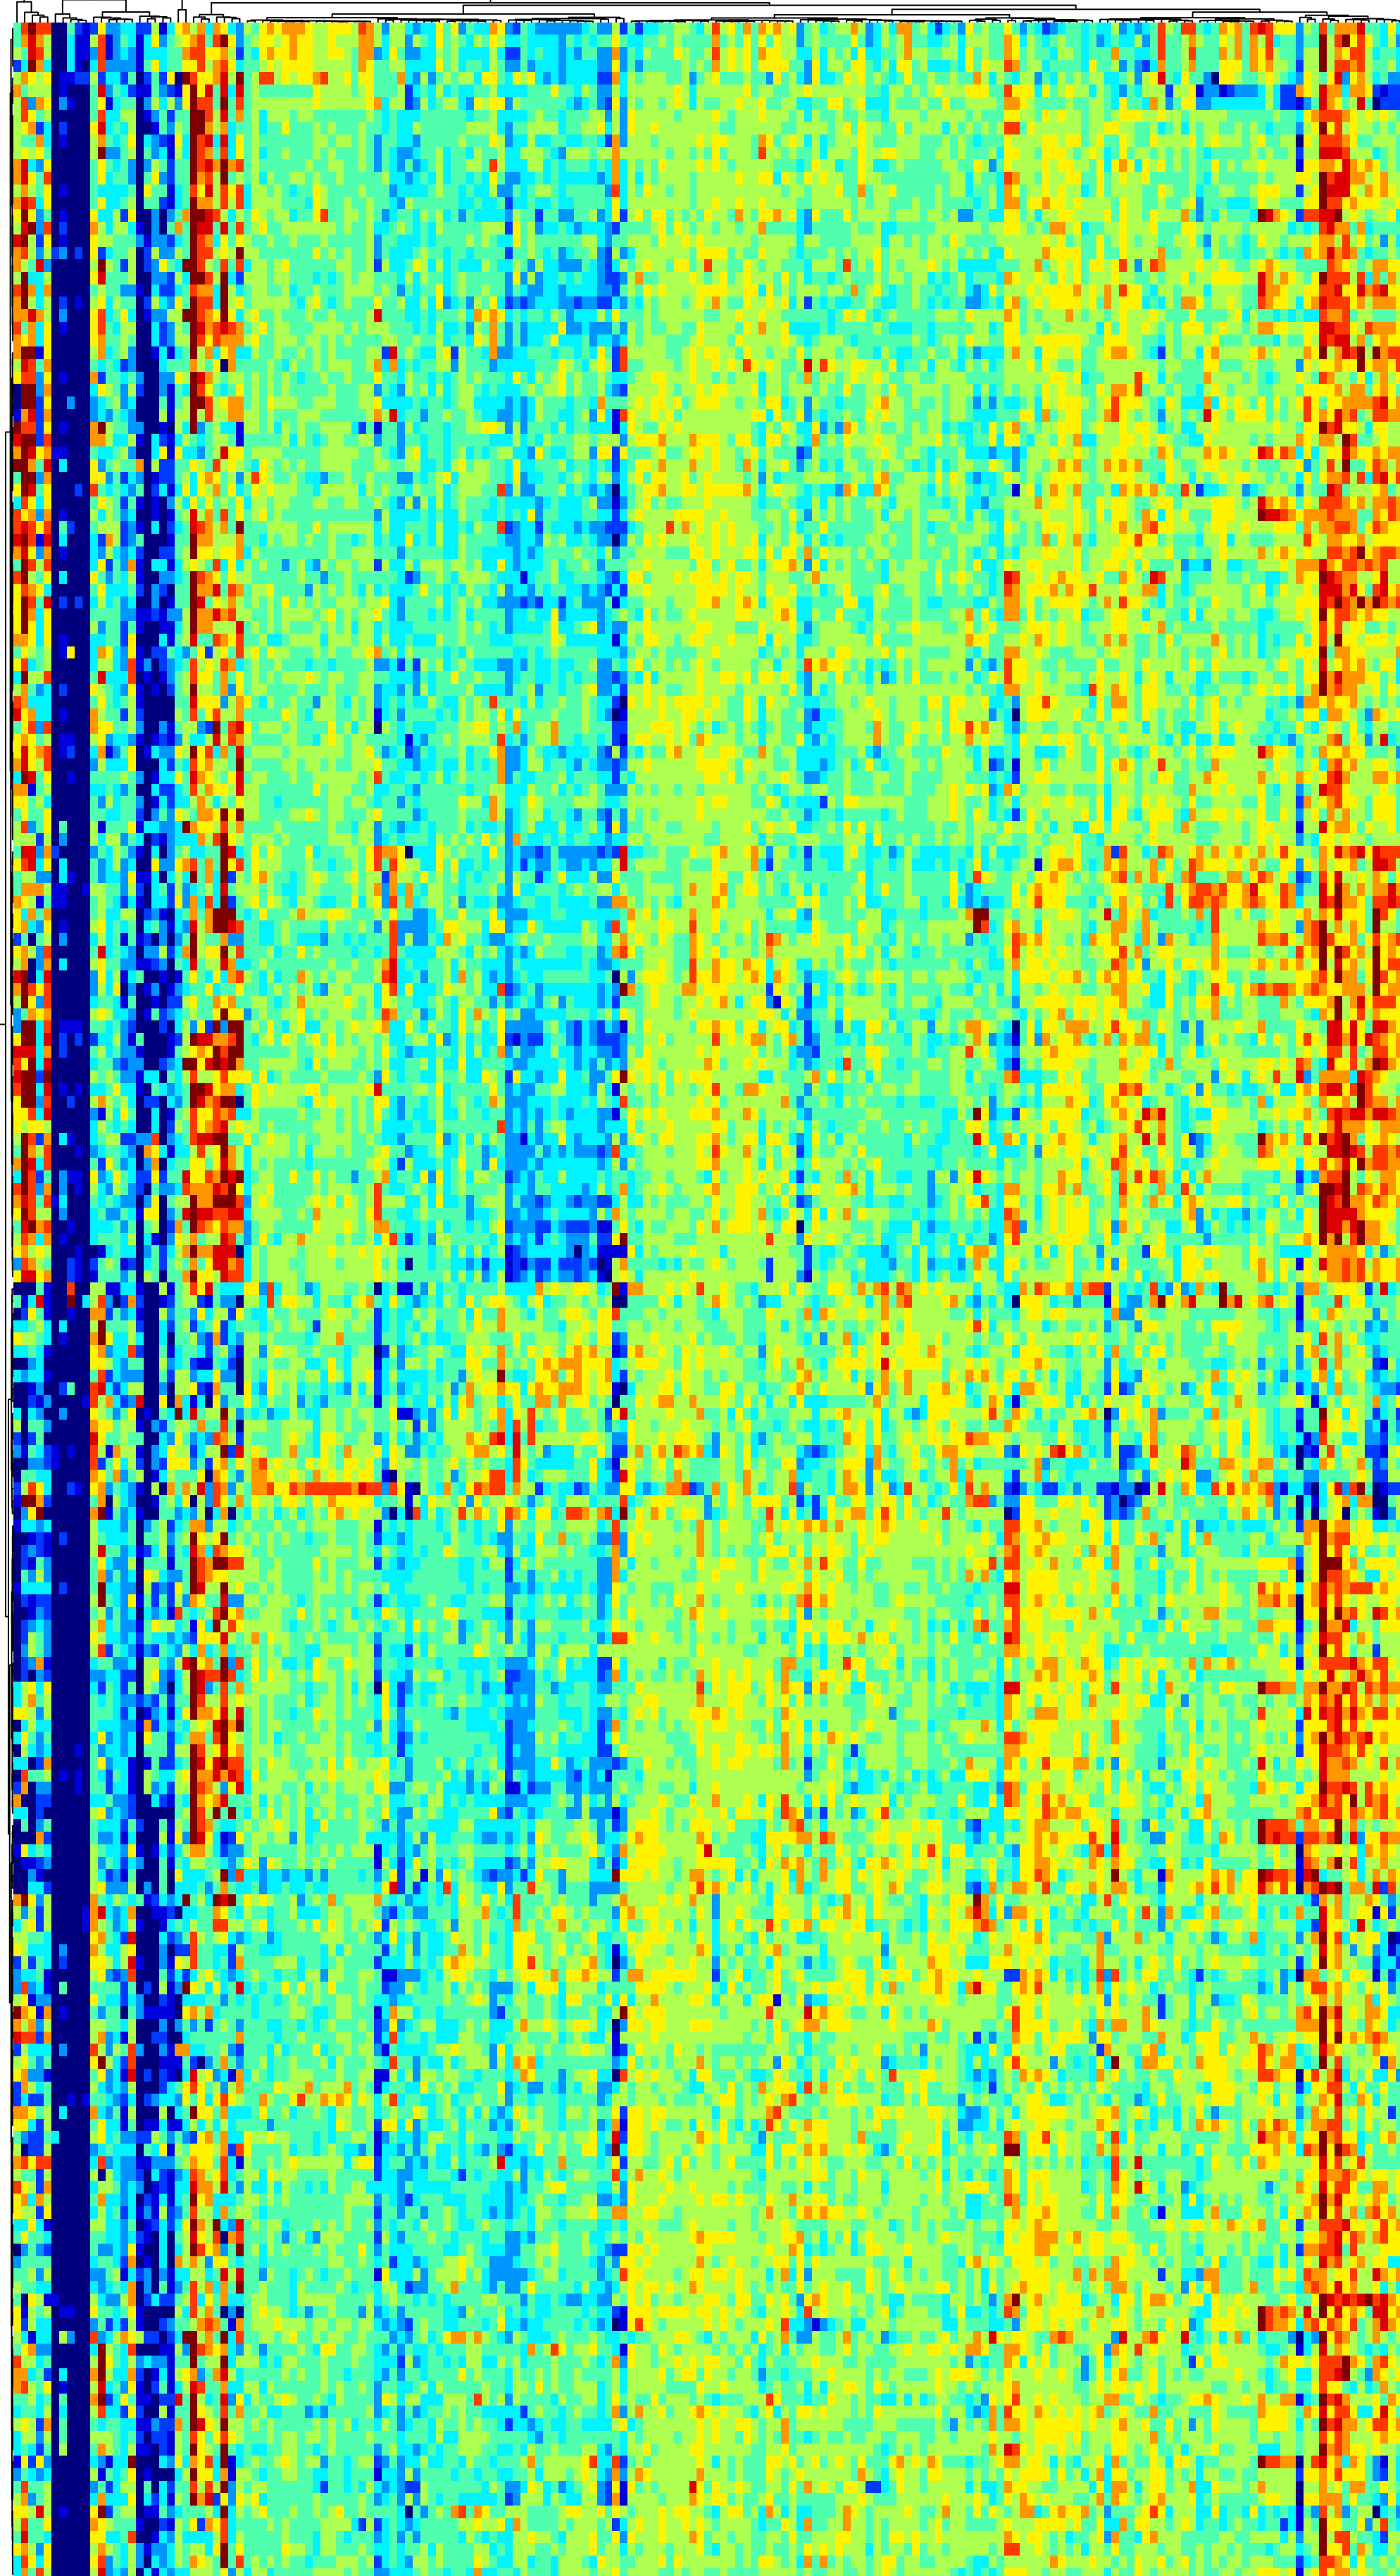

OCIA1M3 inducible HIF1a ODD mut  
OCIA1M3 TRE TGM2 control  
OCIA1M3 708 ppp2R2A shRNA  
OCIA1M3 NS-IPp2R2A shRNA  
OCIA1M3 stat1 R132H  
OCIA1M3 PLK3 wt pool #1  
OCIA1M3 IBH1 wt pool #2 1A  
OCIA1M3 stat3A N642H  
OCIA1M3 stat3A N642H H4F  
OCIA1M3 stat3A N642H  
OCIA1M3 ITD treated  
OCIA1M3 ITD vec  
Mv1 treated  
Mv2 treated  
OCIA1M3 550 TGM2-overexp  
OCIA1M3 TRE TGM2  
OCIA1M3 F53 shRNA  
OCIA1M3 F53 vector  
OCIA1M3 p100SSAA  
Mv1-11  
Mv2-11  
Mv4-11 IBH1 R132H  
Mv4-11 wt(vector)  
GM00131 treated  
M00m13 F53 KD  
M00m13 F53 vector  
M00m14  
M00m14 (AML-ML2)  
Mv1-1  
Mv2-1 treated  
KCG-1 treated  
Leko-1  
BS2-11 treated  
HFB0  
HFB0-1  
HFB0-1 TRE TGM2  
HFB0-1 treated TGM2 control  
HFB0-1  
Mv2-80  
Mv2-80 treated  
Mv2 treated  
TAC ichikawa  
Daudi  
Daudi treated  
OCIA1M3 Bcl2 overexpression  
OCIA1M3 Bcl2 vector  
OCIA1M3 treated  
XBVIS treated  
XBVIS STI w/STI  
XBVIS STI treated w/o STI  
XBVIS STI w/o STI  
XBVIS STI w/o STI  
R01116  
Barmos  
VNO8226  
kasumi-1  
kasumi-1  
kasumi-1 treated  
Mv1e  
V1e  
OCIA1M5 PLKO CTGF  
OCIA1M5 PLKO-NS-shRNA(control)  
Mv1-1 treated  
Mv1-13 treated  
Mv1-13 treated  
Nalm6 treated  
Nalm6 treated  
U937  
U937  
XBM3  
XBM3-K1 (label:KOPTI) (Teresa label: KOPTI ALL)  
OCIA1-1  
KCG-1  
Jurkat 19.2 Caspase8 mut  
Jurkat  
Jurkat treated  
OCIA1-1 CEM  
M013  
M013  
M014

**Table S1. Antibody nomenclature table.** This table consists of five parts with the first being a protein name “Rosetta Stone” showing the HUGO, MiMI and the RPPA modified HUGO protein name abbreviation, the full protein name, the PTM site and consequence. The second part lists the manufacturer of each antibody along with their antibody name, catalog number, and the primary and secondary antibody concentrations utilized. The third section lists which protein functional group each antibody was assigned to. The fourth section records the p-values (corrected for multiple testing to control the FDR at 5%) and effect sizes for the comparison of sample sources (i.e. blood vs. marrow). The last section indicates the p-values (two-sided t-test, corrected for multiple testing to control the FDR at 5%) and effect sizes for the comparison of processing procedures (i.e. cryopreserved vs. fresh). Last two columns: Blood (n = 282) vs. Marrow (n = 387); Cryo (n = 377) vs. Fresh (n = 292).

| Protein Name Rosetta Stone |                              |           |                                                        |                                      | RPPA Staining Details          |                |           |                  |                    |                 | Functional Category | Blood vs. Marrow |           | Cryo vs. Fresh |           |
|----------------------------|------------------------------|-----------|--------------------------------------------------------|--------------------------------------|--------------------------------|----------------|-----------|------------------|--------------------|-----------------|---------------------|------------------|-----------|----------------|-----------|
| RPPA Antibody Name         | Huge Name (added with PTMs)  | MiMI Name | Full Name/Description from GeneCards                   | Functional Effect of Phosphorylation | Common Name Mfg Claimed Target | Manufacturer   | Catalog#  | Anti-body Source | Anti-body Dilution | 2nd Ab dilution | Functional Group    | p-value          | Cohen's d | p-value        | Cohen's d |
| ACTB                       | ACTB                         | ACTB      | Actin Beta                                             |                                      | Actin(β)                       | Sigma          | A5441     | mouse            | 2000               | 20000           | cytoskeletal        | 0.0964           | 0.129     | 0.0000         | 0.796     |
| AIFM1                      | AIFM1                        | AIFM1     | apoptosis-inducing factor, mitochondrion-associated, 1 |                                      | AIF                            | Santa Cruz     | sc-13116  | mouse            | 250                |                 | ApopReg             | 0.6740           | 0.033     | 0.0000         | 0.595     |
| AKT1                       | AKT1                         | AKT1      | v-akt murine thymoma viral oncogene homolog 1          |                                      | AKT1                           | Cell Signaling | 9272      | Rabbit           | 150                | 15000           | pi3kakt             | 0.3743           | -0.069    | 0.0000         | -0.817    |
| AKT1_2_3.pS473             | AKT1/AKT2/AKT3-phosphoser473 | AKT1      | v-akt murine thymoma viral oncogene homolog 1          | Activation                           | AKT-P473(Ser)                  | Cell Signaling | 9271      | Rabbit           | 50                 | 15000           | pi3kakt             | 0.3823           | -0.068    | 0.0000         | -0.624    |
| AKT1_2_3.pT308             | AKT1/AKT2/AKT3-phosphoThr308 | AKT1      | v-akt murine thymoma viral oncogene homolog 1          | Activation                           | AKT-P308(Thr)                  | Cell Signaling | 9275      | Rabbit           | 50                 | 15000           | pi3kakt             | 0.8142           | 0.018     | 0.0000         | 0.912     |
| ASH2L                      | ASH2L                        | ASH2L     | ash2 (absent, small, or homeotic)-like (Drosophila)    |                                      | Ash2L                          | Cell Signaling | 5019      | Rabbit           | 5000               | 15000           | histone             | 0.6513           | -0.035    | 0.0000         | -1.016    |
| ASNS                       | ASNS                         | ASNS      | asparagine synthetase (glutamine-hydrolyzing)          |                                      | ASNS                           | Sigma          | HPA029318 | Rabbit           | 500                | 15000           | metabolic           | 0.5779           | 0.043     | 0.0000         | -0.395    |
| ATF3                       | ATF3                         | ATF3      | activating transcription factor 3                      |                                      | ATF3                           | Abcam          | ab87213   | Rabbit           | 500                | 15000           | autophagy, creb     | 0.4265           | 0.061     | 0.0017         | 0.234     |
| ATG7                       | ATG7                         | ATG7      | autophagy related 7                                    |                                      | ATG7                           | Cell Signaling | 8558      | Rabbit           | 500                | 15000           | autophagy           | 0.5886           | -0.042    | 0.0002         | -0.292    |
| BAD                        | BAD                          | BAD       | BCL2-associated agonist of cell death                  |                                      | Bad                            | Cell Signaling | 9292      | Rabbit           | 100                | 15000           | BH3                 | 0.1154           | 0.124     | 0.0000         | -0.390    |
| BAD_pS112                  | BAD-phospho Ser112           | BAD       | BCL2-associated agonist of cell death                  | Inactivation                         | Bad-p112(Ser)                  | Cell Signaling | 9291      | Rabbit           | 100                | 15000           | BH3                 | 0.1662           | -0.107    | 0.6886         | 0.030     |
| BAD_pS136                  | BAD-phospho Ser136           | BAD       | BCL2-associated agonist of cell death                  | Inactivation                         | Bad-p136(Ser)                  | Cell Signaling | 9295      | Rabbit           | 50                 | 15000           | BH3                 | 0.6238           | 0.037     | 0.0000         | -0.558    |
| BAD_pS155                  | BAD-phospho Ser155           | BAD       | BCL2-associated agonist of cell death                  | Inactivation                         | Bad-p155(Ser)                  | Cell Signaling | 9297      | Rabbit           | 100                | 15000           | BH3                 | 0.4066           | -0.066    | 0.7822         | 0.022     |
| BAK1                       | BAK1                         | BAK1      | BCL2-antagonist/killer 1                               |                                      | Bak                            | Cell Signaling | 3792      | Rabbit           | 50                 | 15000           | BH3                 | 0.6487           | 0.035     | 0.0000         | 1.122     |
| BAX                        | BAX                          | BAX       | BCL2-associated X protein                              |                                      | Bax                            | Cell Signaling | 2772      | Rabbit           | 100                | 15000           | BH3                 | 0.1208           | -0.122    | 0.5601         | 0.045     |
| BCL2                       | BCL2                         | BCL2      | B-cell CLL/lymphoma 2                                  |                                      | Bcl2                           | DAKO           | M0887     | mouse            | 200                | 15000           | BH3                 | 0.6868           | -0.032    | 0.0000         | 0.478     |
| BCL2L1                     | BCL2L1                       | BCL2L1    | BCL2-like 1                                            |                                      | Bcl-XL                         | Cell Signaling | 2762      | Rabbit           | 500                | 20000           | BH3                 | 0.0992           | 0.131     | 0.0000         | 0.869     |

|             |                      |         |                                                                                  |                   |                          |                |         |        |      |       |           |        |        |        |        |
|-------------|----------------------|---------|----------------------------------------------------------------------------------|-------------------|--------------------------|----------------|---------|--------|------|-------|-----------|--------|--------|--------|--------|
| BCL2L11     | BCL2L11              | BCL2L11 | BCL2-like 11 (apoptosis facilitator)                                             |                   | Bim                      | Epitomics      | 1036-1  | Rabbit | 200  | 15000 | BH3       | 0.6561 | -0.035 | 0.0000 | 1.095  |
| BECN1       | BECN1                | BECN1   | beclin 1, autophagy related                                                      |                   | Beclin-1                 | Cell Signaling | 3738    | Rabbit | 500  | 15000 | autophagy | 0.0336 | -0.165 | 0.0268 | -0.164 |
| BID         | BID                  | BID     | BH3 interacting domain death agonist                                             |                   | Bid                      | Cell Signaling | 2002    | Rabbit | 250  | 15000 | BH3       | 0.2264 | -0.094 | 0.0563 | -0.145 |
| BIRC2       | BIRC2                | BIRC2   | baculoviral IAP repeat containing 2                                              |                   | CIAP-1                   | Upstate        | 07-759  | Rabbit | 200  | 15000 | IAP       | 0.7987 | -0.020 | 0.0000 | 0.350  |
| BIRC5       | BIRC5                | BIRC5   | baculoviral IAP repeat containing 5                                              |                   | Survivin                 | Cell Signaling | 2802    | Rabbit | 50   | 15000 | IAP       | 0.0003 | -0.285 | 0.3249 | -0.077 |
| BMI1        | BMI1                 | BMI1    | <i>BMI1</i> polycomb ring finger oncogene                                        |                   | Bmi-1                    | Cell Signaling | 2830    | Rabbit | 150  | 15000 | histone   | 0.7572 | 0.024  | 0.0000 | 0.668  |
| BRAF        | BRAF                 | BRAF    | v-raf murine sarcoma viral oncogene homolog B                                    |                   | Raf-B                    | Santa Cruz     | sc5284  | mouse  | 100  | 15000 | mek       | 0.7902 | -0.021 | 0.0000 | -1.098 |
| BRD4        | BRD4                 | BRD4    |                                                                                  |                   | BRD4                     | Epitomics      | 5716-1  | Rabbit | 250  | 15000 | histone   | 0.3519 | -0.073 | 0.0048 | -0.224 |
| CASP3       | CASP3                | CASP3   | caspase 3, apoptosis-related cysteine peptidase                                  |                   | caspase 3                | Cell Signaling | 9662    | Rabbit | 250  | 15000 | ApopOccur | 0.5420 | -0.048 | 0.0000 | -0.989 |
| CASP3.c1175 | CASP3 cleaved        | CASP3   | caspase 3, apoptosis-related cysteine peptidase                                  |                   | Caspase 3 cleaved Asp175 | Cell Signaling | 9661    | Rabbit | 100  | 15000 | ApopOccur | 0.8579 | 0.014  | 0.0039 | -0.230 |
| CASP7.c1198 | CASP7 cleaved Asp198 | CASP7   | caspase 7, apoptosis-related cysteine peptidase                                  |                   | Caspase 7 cleaved Asp198 | Cell Signaling | 9491    | Rabbit | 250  | 15000 | ApopOccur | 0.3148 | 0.079  | 0.0001 | 0.323  |
| CASP8       | CASP8                | CASP8   | caspase 8, apoptosis-related cysteine peptidase                                  |                   | Caspase 8                | Cell Signaling | 9746    | mouse  | 250  | 15000 | ApopOccur | 0.2870 | 0.084  | 0.2364 | 0.089  |
| CASP9.c1315 | CASP9 cleaved Asp315 | CASP9   | caspase 9, apoptosis-related cysteine peptidase                                  |                   | Caspase 9 cleaved Asp315 | Cell Signaling | 9505    | Rabbit | 250  | 15000 | ApopOccur | 0.8805 | -0.012 | 0.4320 | 0.062  |
| CASP9.c1330 | CASP9 cleaved Asp330 | CASP9   | caspase 9, apoptosis-related cysteine peptidase                                  |                   | Caspase 9 cleaved Asp330 | Cell Signaling | 9501    | Rabbit | 250  | 15000 | ApopOccur | 0.5689 | 0.045  | 0.0000 | 0.873  |
| CAV1        | CAV1                 | CAV1    | caveolin 1, caveolae protein, 22kDa                                              |                   | Caveolin-1               | Cell Signaling | 3238    | Rabbit | 100  | 15000 | adhesion  | 0.9300 | -0.007 | 0.6507 | -0.036 |
| CBL         | CBL                  | CBL     | <i>Cbl</i> proto-oncogene, E3 ubiquitin protein ligase                           |                   | Cbl-c                    | BD sciences    | 610441  | mouse  | 1000 | 15000 | ubiquitin | 0.3865 | -0.068 | 0.0000 | 1.023  |
| CCNB1       | CCNB1                | CCNB1   | cyclin B1                                                                        |                   | Cyclin B1                | Santa Cruz     | SC245   | mouse  | 100  | 15000 | celcycle  | 0.0167 | -0.185 | 0.0000 | 0.626  |
| CCND1       | CCND1                | CCND1   | cyclin D1                                                                        |                   | Cyclin D1(M-20)          | Santa Cruz     | sc718   | Rabbit | 500  | 15000 | celcycle  | 0.4544 | -0.058 | 0.0000 | 0.558  |
| CCND3       | CCND3                | CCND3   | cyclin D3                                                                        |                   | Cyclin D3                | Cell Signaling | 2936    | mouse  | 100  | 15000 | celcycle  | 0.4060 | -0.064 | 0.0000 | -0.400 |
| CCNE1       | CCNE1                | CCNE1   | cyclin E1                                                                        |                   | Cyclin E                 | Santa Cruz     | sc-247  | Rabbit | 100  | 15000 | celcycle  | 0.3551 | -0.072 | 0.0559 | 0.150  |
| CCNE2       | CCNE2                | CCNE2   | cyclin E2                                                                        |                   | Cyclin E2                | Cell Signaling | 1142    | Rabbit | 250  | 15000 | celcycle  | 0.6465 | -0.036 | 0.0000 | -0.491 |
| CD44        | CD44                 | CD44    | <i>CD44</i> molecule (Indian blood group)                                        |                   | CD44.Epi                 | Epitomics      | 1998-1  | Rabbit | 2000 | 15000 | adhesion  | 0.7581 | 0.025  | 0.0000 | 0.877  |
| CD74        | CD74                 | CD74    | <i>CD74</i> molecule, major histocompatibility complex, class II invariant chain |                   | CD74                     | Santa Cruz     | sc-6262 | mouse  | 300  | 15000 | tcell     | 0.3866 | -0.068 | 0.0000 | 0.451  |
| CDK1        | CDK1                 | CDC2    | cyclin-dependent kinase 1                                                        |                   | CDC2                     | calbiochem     | cc01    | mouse  | 200  | 15000 | celcycle  | 0.2448 | -0.090 | 0.0000 | -0.416 |
| CDK2        | CDK2                 | CDK2    | cyclin-dependent kinase 2                                                        |                   | CDK2                     | Santa Cruz     | SC6248  |        | 200  | 15000 | celcycle  | 0.8857 | 0.011  | 0.0000 | -0.631 |
| CDK4        | CDK4                 | CDK4    | cyclin-dependent kinase 4                                                        |                   | CDK4                     | Cell Signaling | 2906    | mouse  | 200  | 15000 | celcycle  | 0.7873 | -0.021 | 0.0000 | -0.517 |
| CDKN1A      | CDKN1A               | CDKN1A  | cyclin-dependent kinase inhibitor 1A (p21, Cip1)                                 |                   | P21/Waf                  | Cell Signaling | 2946    | mouse  | 250  | 10000 | celcycle  | 0.9823 | 0.002  | 0.0000 | 0.982  |
| CDKN1B      | CDKN1B               | CDKN1B  | cyclin-dependent kinase inhibitor 1B (p27, Kip1)                                 |                   | P27                      | Santa Cruz     | sc-528  | Rabbit | 250  | 15000 | celcycle  | 0.7480 | -0.025 | 0.0130 | 0.201  |
| CDKN1B.pS10 | CDKN1B PhosphoSer10  | CDKN1B  | cyclin-dependent kinase inhibitor 1B (p27, Kip1)                                 | Apoptosis altered | P27ps10                  | Epitomics      | 2187-1  | Rabbit | 500  | 15000 | celcycle  | 0.0100 | 0.203  | 0.0000 | 0.483  |
| CDKN2A      | CDKN2A               | CDKN2A  | cyclin-dependent kinase inhibitor 2A                                             |                   | P16                      | santa Cruz     | sc468   | Rabbit | 5000 | 15000 | celcycle  | 0.1593 | 0.110  | 0.0000 | 0.726  |

|                   |                               |          |                                                                    |                      |                       |                |               |        |      |       |               |        |        |        |        |
|-------------------|-------------------------------|----------|--------------------------------------------------------------------|----------------------|-----------------------|----------------|---------------|--------|------|-------|---------------|--------|--------|--------|--------|
| CLPP              | CLPP                          | CLPP     | caseinolytic mitochondrial matrix peptidase proteolytic subunit    |                      | CLPP                  | Abcam          | 124822        | Rabbit | 1000 | 15000 | histone       | 0.5881 | -0.043 | 0.0000 | 0.822  |
| COPS5             | COPS5                         | COPS5    | COP9 signalosome subunit 5                                         |                      | JAB1                  | Santa Cruz     | sc-13157      | mouse  | 300  | 15000 | ubiquitin     | 0.0333 | 0.166  | 0.0000 | -1.139 |
| CREB1             | CREB1                         | CREB1    | cAMP responsive element binding protein 1                          |                      | CREB                  | Epitomics      | 1496-1        | Rabbit | 2000 | 15000 | creb          | 0.4912 | -0.056 | 0.0008 | 0.251  |
| CREB1.pS133       | CREB2 phospho Ser133          | CREB1    | cAMP responsive element binding protein 1                          | Activation           | CREB-p(ser133)        | Epitomics      | 1113-1        | Rabbit | 2000 | 15000 | creb          | 0.4939 | -0.054 | 0.0104 | -0.203 |
| CTNNA1            | CTNNA1                        | CTNNA1   | catenin (cadherin-associated protein), alpha 1, 102kDa             |                      | Catenin-alpha         | calbiochem     | CA1030        | mouse  | 75   | 15000 | wnt           | 0.9015 | 0.010  | 0.0076 | 0.209  |
| CTNNB1            | CTNNB1                        | CTNNB1   | catenin (cadherin-associated protein), beta 1, 88kDa               |                      | Catenin-beta          | Cell Signaling | 9562          | Rabbit | 50   | 15000 | wnt           | 0.0009 | -0.256 | 0.0431 | 0.159  |
| CTNNB1.pS33_37_41 | CTNNB1-phospho Ser33/37/Thr41 | CTNNB1   | catenin (cadherin-associated protein), beta 1, 88kDa               | Leads to degradation | catenin-beta phospho- | Cell Signaling | 9561          | Rabbit | 500  | 15000 | wnt           | 0.5061 | 0.053  | 0.0877 | 0.128  |
| CTSG              | CTSG                          | CTSG     | cathepsin G                                                        |                      | CTSG                  | Abcam          | ab8816        | sheep  | 500  | 30000 | adhesion      | 0.0144 | -0.190 | 0.0000 | 0.962  |
| DIABLO            | DIABLO                        | DIABLO   | <i>blo</i> , IAP-binding mitochondrial protein                     |                      | Smac/Diablo           | Cell Signaling | 2954          | mouse  | 500  | 15000 | IAP           | 0.7975 | -0.020 | 0.0000 | 0.641  |
| DLX1              | DLX1                          | DLX1     | distal-less homeobox 1                                             |                      | DLX1                  | Abnova         | H00001745-M01 | mouse  | 1000 | 15000 | transcription | 0.5635 | 0.045  | 0.0001 | -0.304 |
| DUSP6             | DUSP6                         | DUSP6    | dual specificity phosphatase 6                                     |                      | DUSP6                 | abcam          | ab76310       | Rabbit | 3000 | 15000 | mek           | 0.1256 | 0.120  | 0.1900 | 0.104  |
| EGFR              | EGFR                          | EGFR     | Epidermal growth factor receptor                                   |                      | EGFR                  | Santa Cruz     | sc-03         | Rabbit | 500  | 20000 | mtor, STP     | 0.9740 | -0.003 | 0.0000 | 0.491  |
| EGFR.pY992        | EGFR-phospho Tyr992           | EGFR     | Epidermal growth factor receptor                                   | Activation           | EGFR-p tyr992         | Cell Signaling | 2235          | Rabbit | 50   | 15000 | mtor          | 0.1042 | 0.129  | 0.0000 | 0.352  |
| EGLN1             | EGLN1                         | EGLN1    | egl-9 family hypoxia-inducible factor 1                            |                      | EglN1                 | Millipore      | 05-1327       | mouse  | 500  | 5000  | hypoxia       | 0.0799 | 0.139  | 0.0000 | -0.423 |
| EIF2AK2           | EIF2AK2                       | EIF2AK2  | ryotic translation initiation factor 2-alpha kinase 2              |                      | PRKR(EIF2AK2)         | Abnova         | H00005610-M02 | mouse  | 5000 | 15000 | transcription | 0.4336 | 0.061  | 0.0000 | -1.329 |
| EIF2AK2.pT451     | EIF2AK2.phospho Thr 451       | EIF2AK2  | ryotic translation initiation factor 2-alpha kinase 2              | Activation           | PRKRpTh451(EIF2AK2)   | invitrogen     | 44-668G       | Rabbit | 1500 | 15000 | transcription | 0.8923 | 0.010  | 0.0000 | 0.434  |
| EIF2S1            | EIF2S1                        | EIF2S1   | eukaryotic translation initiation factor 2, subunit 1 alpha, 35kDa |                      | eIF2                  | Cell Signaling | 9722          | Rabbit | 3000 | 15000 | transcription | 0.9015 | -0.010 | 0.0000 | -1.628 |
| EIF2S1.pS51       | EIF2S1-phospho Ser51          | EIF2S1   | eukaryotic translation initiation factor 2, subunit 1 alpha, 35kDa | Stabalizes           | phospho-eIF2-alpha    | Cell Signaling | 9721          | Rabbit | 250  | 15000 | transcription | 0.4258 | -0.062 | 0.0000 | -0.912 |
| EIF4E             | EIF4E                         | EIF4E    | otic translation initiation factor 4E                              |                      | eIF4E                 | Cell Signaling | 9742          | Rabbit | 200  | 15000 | transcription | 0.7838 | -0.021 | 0.0000 | -1.736 |
| EIF4EBP1          | EIF4EBP1                      | EIF4EBP1 | proliferation-associated 2G4, 38kDa                                |                      | EBP1                  | Cell Signaling | 9452          | Rabbit | 500  | 15000 | s6rp          | 0.2127 | -0.097 | 0.0000 | -1.790 |
| EIF4EBP1.pS65     | EIF4EBP1.phospho Ser S65      | EIF4EBP1 | proliferation-associated 2G4, 38kDa                                | Inactivation         | EBP1.pser65           | Cell Signaling | 9456          | Rabbit | 400  | 15000 | s6rp          | 0.0570 | -0.147 | 0.0000 | -1.224 |
| EIF4EBP1.pT37_46  | EIF4EBP1.phospho Thr T37 & 46 | EIF4EBP1 | proliferation-associated 2G4, 38kDa                                | Inactivation         | EBP1.pthr37_46        | Cell Signaling | 9459          | Rabbit | 1000 | 15000 | s6rp          | 0.0137 | -0.193 | 0.0000 | -1.028 |
| EIF4EBP1.pT70     | EIF4EBP1.phospho Thr T70      | EIF4EBP1 | proliferation-associated 2G4, 38kDa                                | Inactivation         | EBP1.pthr70           | Cell Signaling | 9455          | Rabbit | 200  | 15000 | s6rp          | 0.0000 | -0.328 | 0.0000 | -1.569 |
| ELK1.pS383        | ELK1-phospho Ser383           | ELK1     | <i>ELK1</i> , member of ETS oncogene family                        | Activation           | EIK(phospho-ser383)   | Cell Signaling | 9181          | Rabbit | 100  | 15000 | mek, pi3kakt  | 0.0853 | -0.136 | 0.0002 | -0.287 |
| ERBB2             | ERBB2                         | ERBB2    | v-erb-b2 avian erythroblastic leukemia viral oncogene homolog 2    |                      | HER2/Erb2             | Cell Signaling | 2242          | Rabbit | 250  | 15000 | STP           | 0.1443 | 0.116  | 0.0030 | 0.237  |
| ERBB2.pY1248      | ERBB2-phospho Tyr1248         | ERBB2    | v-erb-b2 avian erythroblastic leukemia viral oncogene homolog 2    | Activation           | HER2(p-Tyr1248)       | Upstate        | 06-229        | Rabbit | 1500 | 15000 | STP           | 0.5560 | 0.046  | 0.0003 | -0.287 |
| ERBB3             | ERBB3                         | ERBB3    | v-erb-b2 avian erythroblastic leukemia viral oncogene homolog 3    |                      | HER3                  | Upstate        | 05-390        | mouse  | 500  | 15000 | STP           | 0.2394 | 0.093  | 0.0002 | 0.288  |



|                       |                                         |          |                                                                                         |                                                                                  |                               |                |          |        |         |       |                                |        |        |        |        |
|-----------------------|-----------------------------------------|----------|-----------------------------------------------------------------------------------------|----------------------------------------------------------------------------------|-------------------------------|----------------|----------|--------|---------|-------|--------------------------------|--------|--------|--------|--------|
| ERG                   | ERG                                     | EGR1     | early growth response 1                                                                 |                                                                                  | ERG1/2/3                      | Santa Cruz     | sc-353   | Rabbit | 1000    | 15000 | transcription                  | 0.9473 | -0.005 | 0.0000 | -1.146 |
| FLI1                  | Fli1                                    | FLI1     | Fli-1 proto-oncogene, ETS transcription factor                                          |                                                                                  | Fli                           | Dennis Watson  |          | Rabbit | 2000    | 15000 | fli1, histone                  | 0.7253 | 0.028  | 0.0000 | -0.763 |
| FN1                   | FN1                                     | FN1      | fibronectin 1                                                                           |                                                                                  | Fibronectin                   | Epitomics      | 1574     | Rabbit | 30000   | 15000 | adhesion                       | 0.0000 | -0.373 | 0.0000 | 1.249  |
| FOXO1.pT24_FOXO3.pT32 | FOXO1-phospho thr24/FOXO3-phospho thr32 | FOXO1    | forkhead box O1                                                                         | Inactivation                                                                     | FoxO1a/3a                     | Cell Signaling | 9464     | Rabbit | 500     | 15000 | cellcycle, pi3kakt             | 0.2335 | 0.094  | 0.1729 | 0.110  |
| FOXO3                 | FOXO3                                   | FOXO3    | forkhead box O3                                                                         |                                                                                  | FoxO3a                        | Cell Signaling | 9467     | Rabbit | 500     | 20000 | cellcycle, pi3kakt             | 0.1311 | -0.118 | 0.0000 | 1.537  |
| FOXO3.S318_321        | FOXO3-phospho Ser318/321                | FOXO3    | forkhead box O3                                                                         | Inactivation                                                                     | FKHRL1/FoxO3a (P-Ser 318/321) | Cell Signaling | 9465     | Rabbit | 10000   | 15000 | cellcycle, pi3kakt             | 0.0987 | 0.131  | 0.5286 | 0.049  |
| GAB2                  | GAB2                                    | GAB2     | GRB2-associated binding protein 2                                                       |                                                                                  | Gab2                          | Cell Signaling | 3239     | Rabbit | 500     | 15000 | pi3kakt                        | 0.6883 | -0.032 | 0.0000 | -0.912 |
| GAB2.pY452            | GAB2-phospho Tyr452                     | GAB2     | GRB2-associated binding protein 2                                                       | Tyr452 is a potential binding site of p85, the regulatory subunit of PI3 kinase. | Gab2-pTyr452                  | Cell Signaling | 3882     | Rabbit | 100     | 15000 | pi3kakt                        | 0.8325 | 0.017  | 0.0000 | -0.832 |
| GAPDH                 | GAPDH                                   | GAPDH    | glyceraldehyde-3-phosphate dehydrogenase                                                |                                                                                  | GAPDH                         | Cell Signaling | 4300     | mouse  | 2000    | 15000 | metabolic                      | 0.1393 | 0.115  | 0.0000 | -1.365 |
| GATA1                 | GATA1                                   | GATA1    | GATA binding protein 1 (globin transcription factor 1)                                  |                                                                                  | GATA-1                        | Cell Signaling | 3535     | Rabbit | 1000    | 15000 | differentiation, transcription | 0.0000 | -0.513 | 0.4038 | 0.064  |
| GATA3                 | GATA3                                   | GATA3    | GATA binding protein 3                                                                  |                                                                                  | Gata3                         | BD bioscience  | 558686   | mouse  | 500     | 15000 | differentiation, transcription | 0.1692 | 0.107  | 0.0000 | 1.910  |
| GSKA_B                | GSKA/GSKB                               | GSK3A    | glycogen synthase kinase 3 alpha                                                        |                                                                                  | GSK3                          | santa Cruz     | sc-7291  | mouse  | 200     | 15000 | autophagy, pi3kakt             | 0.0922 | 0.133  | 0.0000 | -1.793 |
| GSKA_B.pS21_9         | GSKA/GSKB-phospho Ser21/9               | GSK3A    | glycogen synthase kinase 3 alpha                                                        | Inactivation                                                                     | GSK3a/B(p-ser21/9)            | Cell Signaling | 9331     | Rabbit | 200     | 15000 | autophagy, pi3kakt             | 0.1380 | -0.115 | 0.0000 | -0.348 |
| H3histone             | HIST3H3                                 | HIST3H3  | histone cluster 3, H3                                                                   |                                                                                  | H3histone                     | active motif   | 39163    | Rabbit | 1500000 | 40000 | histone                        | 0.8604 | 0.014  | 0.0000 | 1.050  |
| H3K27Me3              | HIST3H3-K27-Me3                         | HIST3H3  | histone cluster 3, H3, Lysine 27 methylation 3                                          | Repression                                                                       | H3K27Me3                      | active motif   | 61017    | mouse  | 3000    | 40000 | histone                        | 0.0660 | 0.147  | 0.0000 | 1.037  |
| H3K4Me2               | HIST3H3-K4-Me2                          | HIST3H3  | histone cluster 3, H3, Lysine 4 methylation 2                                           | Repression                                                                       | H3K4Me2                       | active motif   | 39141    | Rabbit | 8000    | 20000 | histone                        | 0.2023 | 0.102  | 0.0000 | 1.043  |
| H3K4Me3               | HIST3H3-K4-Me3                          | HIST3H3  | histone cluster 3, H3, Lysine 4 methylation 3                                           | Repression                                                                       | H3K4Me3                       | active motif   | 39159    | Rabbit | 7000    | 20000 | histone                        | 0.7350 | 0.027  | 0.0000 | 0.995  |
| HDAC1                 | HDAC1                                   | HDAC1    | histone deacetylase 1                                                                   |                                                                                  | HDAC1                         | Imgenex        | IM-337   | Rabbit | 400     | 20000 | histone                        | 0.1937 | 0.100  | 0.0345 | -0.165 |
| HDAC2                 | HDAC2                                   | HDAC2    | histone deacetylase 2                                                                   |                                                                                  | HDAC2                         | Santa Cruz     | sc-7899  | Rabbit | 1000    | 15000 | histone                        | 0.6995 | 0.030  | 0.0000 | -0.565 |
| HDAC3                 | HDAC3                                   | HDAC3    | histone deacetylase 3                                                                   |                                                                                  | HDAC3                         | Cell Signaling | 2632     | Rabbit | 100     | 15000 | histone                        | 0.2363 | 0.091  | 0.0297 | 0.161  |
| HIF1A                 | HIF1A                                   | HIF1A    | hypoxia inducible factor 1, alpha subunit (basic helix-loop-helix transcription factor) |                                                                                  | HIF-1a                        | BD pharmingen  | 610959   | mouse  | 50      | 15000 | hypoxia                        | 0.3670 | 0.069  | 0.0000 | -0.388 |
| HNRNPK                | HNRNPK                                  | HNRNPK   | rogenous nuclear ribonucleoprotein K                                                    |                                                                                  | hnRNPk                        | Santa Cruz     | sc-28380 | mouse  | 5000    | 15000 | histone                        | 0.4864 | -0.054 | 0.0000 | -1.146 |
| HSP90AA1_B1           | HSP90AA1/HSP90AB1                       | HSP90AA1 | heat shock protein 90kDa alpha (cytosolic), class A member 1                            |                                                                                  | HSP90                         | Cell Signaling | 4875     | Rabbit | 500     | 15000 | heatshock                      | 0.1229 | -0.118 | 0.0000 | -1.282 |
| HSPA1A_L              | HSPA1A/HSPA1L                           | HSPA1A   | heat shock 70kDa protein 1A                                                             |                                                                                  | HSP70                         | Cell Signaling | 4872     | Rabbit | 250     | 15000 | heatshock                      | 0.1369 | 0.118  | 0.1743 | 0.108  |
| HSPB1                 | HSPB1                                   | HSPB1    | heat shock 27kDa protein 1                                                              |                                                                                  | HSP27                         | Cell Signaling | 2402     | mouse  | 100     | 15000 | heatshock                      | 0.7967 | 0.020  | 0.0000 | 0.581  |
| IGF1R                 | IGF1R                                   | IGF1R    | insulin-like growth factor 1 receptor                                                   |                                                                                  | IGF-1 receptor beta           | Cell Signaling | 3027     | Rabbit | 1000    | 15000 | STP                            | 0.9536 | -0.005 | 0.9688 | 0.003  |

|                    |                                  |        |                                                                                                       |            |                           |                     |          |        |      |       |               |        |        |        |        |
|--------------------|----------------------------------|--------|-------------------------------------------------------------------------------------------------------|------------|---------------------------|---------------------|----------|--------|------|-------|---------------|--------|--------|--------|--------|
| IGFBP2             | IGFBP2                           | IGFBP2 | insulin-like growth factor binding protein 2, 36kDa                                                   |            | IGFBP-2                   | Cell Signaling      | 3922     | Rabbit | 250  | 15000 | adhesion      | 0.6565 | -0.035 | 0.0000 | 0.883  |
| INPP5D             | INPP5D                           | INPP5D | inositol polyphosphate-5-phosphatase, 145kDa                                                          |            | SHIP1                     | Santa Cruz          | SC-8425  | mouse  | 250  | 15000 | mtor          | 0.7708 | -0.022 | 0.0000 | -0.749 |
| INPPL1             | INPPL1                           | INPPL1 | inositol polyphosphate phosphatase-like 1                                                             |            | SHIP2                     | Cell Signaling      | 2730     | Rabbit | 300  | 15000 | mtor          | 0.5815 | -0.043 | 0.0001 | -0.303 |
| IRS1_pS1101        | IRS1-phosphoser1101              | IRS1   | insulin receptor substrate 1                                                                          | Inhibition | IRS-1-p(ser1101)          | Cell Signaling      | 2385     | Rabbit | 250  | 15000 | mtor, tp53    | 0.1163 | -0.120 | 0.0000 | 0.347  |
| ITGA2              | ITGA2                            | ITGA2  | integrin, alpha 2 (CD49B, alpha 2 subunit of VLA-2 receptor)                                          |            | CD49b                     | BD Transduction Lab | 611016   | mouse  | 500  | 15000 | adhesion      | 0.5572 | 0.045  | 0.0000 | 1.619  |
| ITGAL              | ITGAL                            | ITGAL  | integrin, alpha L (antigen CD11A (p180), lymphocyte function-associated antigen 1; alpha polypeptide) |            | CD11a                     | BD Transduction Lab | 610826   | mouse  | 500  | 15000 | adhesion      | 0.5836 | -0.043 | 0.0000 | 1.789  |
| ITGB3              | ITGB3                            | ITGB3  | integrin, beta 3 (platelet glycoprotein IIIa, antigen CD61)                                           |            | Integrin-beta3            | Cell Signaling      | 4702     | Rabbit | 250  | 15000 | adhesion      | 0.5481 | 0.047  | 0.0000 | 1.517  |
| JMJD6              | JMJD6                            | JMJD6  | jumonji domain containing 6                                                                           |            | JMJD6                     | Abcam               | ab50720  | Rabbit | 1000 | 20000 | histone       | 0.5229 | 0.049  | 0.0000 | 0.708  |
| JUN_pS73           | JUN-phosphoser73                 | JUN    | jun proto-oncogene                                                                                    | Activation | Jun-C-phosphoser73        | Cell Signaling      | 9164     | Rabbit | 100  | 10000 | transcription | 0.1456 | 0.114  | 0.0000 | -0.989 |
| JUNB               | JUNB                             | JUNB   | jun B proto-oncogene                                                                                  |            | Jun-B                     | Cell Signaling      | 3755     | Rabbit | 100  | 15000 | transcription | 0.0460 | 0.160  | 0.0034 | 0.229  |
| KDM1A              | KDM1A                            | KDM1A  | lysine (K)-specific demethylase 1A                                                                    |            | LSD1                      | Cell Signaling      | 2184     | Rabbit | 3000 | 15000 | histone       | 0.1172 | -0.123 | 0.0000 | -1.114 |
| KDR                | KDR                              | KDR    | kinase insert domain receptor (a type III receptor tyrosine kinase)                                   |            | VEGFR2                    | Cell Signaling      | 2479     | Rabbit | 700  | 15000 | hypoxia       | 0.0865 | 0.134  | 0.0140 | -0.194 |
| KIT                | KIT                              | KIT    | v-kit Hardy-Zuckerman 4 feline sarcoma viral oncogene homolog                                         |            | Kit-C                     | Epitomics           | 1522     | Rabbit | 1000 | 15000 | mek, STP      | 0.0007 | -0.260 | 0.0000 | -0.601 |
| LCK                | LCK                              | LCK    | lymphocyte-specific protein tyrosine kinase                                                           |            | Lck                       | Cell Signaling      | 2752     | Rabbit | 50   | 15000 | tccl          | 0.0550 | 0.151  | 0.0000 | 2.029  |
| LEF1               | LEF1                             | LEF1   | lymphoid enhancer-binding factor 1                                                                    |            | LEF1                      | Cell Signaling      | 2230     | Rabbit | 1000 | 15000 | wnt           | 0.0036 | 0.232  | 0.0000 | 0.654  |
| LGALS3             | LGALS3                           | LGALS3 | lectin, galactoside-binding, soluble, 3                                                               |            | Galectin-3                | Santa Cruz          | sc-32790 | mouse  | 250  | 15000 | tccl          | 0.1909 | 0.103  | 0.0000 | 0.401  |
| LYN                | LYN                              | LYN    | v-yes-1 Yamaguchi sarcoma viral related oncogene homolog                                              |            | Lyn                       | Cell Signaling      | 2732     | Rabbit | 250  | 15000 | mek, STP      | 0.1827 | 0.106  | 0.0000 | 0.925  |
| MAP2K1             | MAP2K1                           | MAP2K1 | mitogen-activated protein kinase kinase 1                                                             |            | MEK                       | Cell Signaling      | 9122     | Rabbit | 2000 | 10000 | mapk          | 0.7990 | -0.020 | 0.9237 | -0.007 |
| MAP2K1_2_pS217_221 | MAP2K1/MAP2K2-phosphoser217/221  | MAP2K1 | mitogen-activated protein kinase kinase 1                                                             | Activation | MEK(p-ser217/221)         | Cell Signaling      | 9121     | Rabbit | 1000 | 15000 | mapk          | 0.3554 | 0.073  | 0.0000 | 0.352  |
| MAPK1              | MAPK1                            | MAPK1  | mitogen-activated protein kinase 1                                                                    |            | Erk2                      | Santa Cruz          | Sc-154   | Rabbit | 2000 | 15000 | mapk          | 0.1481 | 0.113  | 0.0015 | -0.240 |
| MAPK1_3_pT202Y204  | MAPK1/MAPK3-phosphoThr202/Tyr204 | MAPK1  | mitogen-activated protein kinase 1                                                                    | Activation | Erk-p42/44(Thr202/Tyr204) | Cell Signaling      | 9101     | Rabbit | 400  | 15000 | mapk          | 0.5190 | 0.051  | 0.0000 | 0.518  |
| MAPK14             | MAPK14                           | MAPK14 | mitogen-activated protein kinase 14                                                                   |            | P38                       | Cell Signaling      | 9212     | Rabbit | 200  |       | mapk          | 0.2260 | -0.095 | 0.0000 | -0.815 |
| MAPK14_pT180Y182   | MAPK14-p180p182                  | MAPK14 | mitogen-activated protein kinase 14                                                                   | Activation | P38p180p182               | Cell Signaling      | 9211     | Rabbit | 10   | 15000 | mapk          | 0.2214 | -0.096 | 0.2806 | -0.084 |
| MAPK9              | MAPK9                            | MAPK9  | mitogen-activated protein kinase 9                                                                    |            | JNK2                      | Cell Signaling      | 4672     | Rabbit | 25   | 15000 | mapk, stat    | 0.4195 | -0.064 | 0.0000 | -1.098 |
| MAPT               | MAPT                             | MAPT   | microtubule-associated protein tau                                                                    |            | Tau                       | Upstate             | 05-348   | mouse  | 150  | 15000 | cytoskeletal  | 0.2708 | 0.088  | 0.0000 | -0.541 |
| MCL1               | MCL1                             | MCL1   | myeloid cell leukemia sequence 1 (BCL2-related)                                                       |            | MCL1                      | BD pharmingen       | 559027   | mouse  | 50   | 15000 | BH3           | 0.0999 | 0.125  | 0.0000 | 0.628  |
| MDM2               | MDM2                             | MDM2   | MDM2 oncogene, E3 ubiquitin protein ligase                                                            |            | MDM2                      | Santa Cruz          | sc813    | Rabbit | 5000 | 15000 | tp53          | 0.4832 | -0.056 | 0.0000 | 0.740  |

|                      |                              |        |                                                                         |              |                           |                  |           |        |          |       |                         |        |        |        |        |
|----------------------|------------------------------|--------|-------------------------------------------------------------------------|--------------|---------------------------|------------------|-----------|--------|----------|-------|-------------------------|--------|--------|--------|--------|
| MDM4                 | MDM4                         | MDM4   | <i>Mdm4</i> p53 binding protein homolog (mouse)                         |              | MDM4                      | Bethly lab       | A300-287A | Rabbit | 5000     | 15000 | tp53                    | 0.0621 | 0.146  | 0.1703 | 0.106  |
| MET_pY1230_1234_1235 | MET-phospho Py1230/1234/1235 | MET    | <i>met</i> proto-oncogene                                               | Activation   | C-Met-pTyr 1230/1234/1235 | Biosource        | 44-888G   | Rabbit | 250      | 20000 | STP                     | 0.0123 | -0.193 | 0.0000 | 0.488  |
| MTOR                 | MTOR                         | FRAP1  | mechanistic target of rapamycin (serine/threonine kinase)               |              | mTor                      | Cell Signaling   | 2983      | Rabbit | 200      | 10000 | mtor                    | 0.5073 | 0.117  | 0.0000 | 0.158  |
| MTOR.pS2448          | MTOR-phospho Ser2448         | FRAP1  | mechanistic target of rapamycin (serine/threonine kinase)               | Activation   | mTor(p-Ser2448)           | Cell Signaling   | 2971      | Rabbit | 100      | 15000 | mtor                    | 0.0395 | 0.052  | 0.0000 | -0.548 |
| MYC                  | MYC                          | MYC    | <i>v-myc</i> avian myelocytomatosis viral oncogene homolog              |              | Myc                       | Cell Signaling   | 9402      | Rabbit | 100      | 15000 | celcycle, transcription | 0.0076 | -0.161 | 0.0000 | 0.569  |
| NCL                  | NCL                          | NCL    | nucleolin                                                               |              | C23 (nucleolin)           | Santa Cruz       | sc8031    | mouse  | 200      | 15000 | flil, histone           | 0.7710 | -0.205 | 0.0000 | -0.382 |
| NF2                  | NF2                          | NF2    | neurofibromin 2 (merlin)                                                |              | NF2                       | Santa Cruz       | sc332     | Rabbit | 500      | 15000 | cytoskeletal, hippo     | 0.0028 | 0.023  | 0.5829 | -1.327 |
| NF2.pS518            | NF2-phospho ser518           | NF2    | neurofibromin 2 (merlin)                                                | Inactivation | pNF2(ser518)              | chemicon         | AB5607    | Rabbit | 500      | 15000 | cytoskeletal, hippo     | 0.0889 | -0.234 | 0.0000 | -0.043 |
| NOL3                 | ARC                          | ARC    | activity-regulated cytoskeleton-associated protein                      |              | ARC                       | Imgenex          | IMG-171   | Rabbit | 2000     | 15000 | ApopReg,BH3             | 0.6040 | 0.135  | 0.0059 | 0.365  |
| NOTCH1.c11744        | NOTCH1 cleaved val11744      | NOTCH1 | notch 1                                                                 | Activation   | Notch1-cleaved (Val11744) | Cell Signaling   | 4147      | Rabbit | 400      | 15000 | tcell                   | 0.0000 | -0.041 | 0.8618 | 0.217  |
| NOTCH3               | NOTCH3                       | NOTCH3 | notch 3                                                                 |              | Notch3                    | santa Cruz       | sc5593    | Rabbit | 200      | 15000 | tcell                   | 0.2132 | 0.332  | 0.0000 | 0.014  |
| NPM1                 | NPM1                         | NPM1   | nucleophosmin (nucleolar phosphoprotein B23, numatrin)                  |              | NPM                       | invitrogen       | 32-5200   | mouse  | 10000    | 15000 | histone                 | 0.6235 | -0.093 | 0.1202 | 0.597  |
| NPM1.3542            | NPM1mut AA3542               | NPM1   | nucleophosmin (nucleolar phosphoprotein B23, numatrin)                  |              | NPM1.3542                 | Cell Signaling   | 3542      | Rabbit | 1000     | 15000 | flil                    | 0.1976 | -0.038 | 0.0000 | -0.122 |
| NR4A1                | NR4A1                        | NR4A1  | nuclear receptor subfamily 4, group A, member 1                         |              | Nur77                     | Imgenex          | IMG-528   | Rabbit | 200      | 15000 | transcription           | 0.7442 | -0.100 | 0.0000 | -0.935 |
| NRP1                 | NRP1                         | NRP1   | neuropilin 1                                                            |              | NRP1(neuropilin)          | Santa Cruz       | SC-5307   | mouse  | 10       | 20000 | cytoskeletal            | 0.0121 | 0.025  | 0.0000 | -0.909 |
| ODC1                 | ODC1                         | ODC1   | ornithine decarboxylase 1                                               |              | ODC                       | Shantz/Lisa Lab  |           |        | 500      | 15000 | metabolic               | 0.0773 | 0.201  | 0.0000 | 0.344  |
| PARK7                | PARK7                        | PARK7  | parkinson protein 7                                                     |              | DJ-1                      | Private-Andreeff |           | Rabbit | 500      | 15000 | autophagy               | 0.1003 | -0.135 | 0.0000 | 1.023  |
| PARP1                | PARP1                        | PARP1  | poly (ADP-ribose) polymerase 1                                          |              | PARP                      | Cell Signaling   | 9542      | Rabbit | 200      | 15000 | ApopOccur               | 0.2141 | 0.130  | 0.0000 | -1.579 |
| PARP1.c1214          | PARP1-cleaved Asp 214        | PARP1  | poly (ADP-ribose) polymerase 1                                          | Activation   | PARP(cleaved Asp214)      | Cell Signaling   | 9541      | Rabbit | 100      | 15000 | ApopOccur               | 0.3728 | 0.096  | 0.2080 | -0.488 |
| PDK1                 | PDK1                         | PDK1   | pyruvate dehydrogenase kinase, isozyme 1                                |              | PDK1                      | Cell Signaling   | 3062      | Rabbit | 200      | 15000 | mtor                    | 0.4773 | 0.069  | 0.0016 | 0.099  |
| PDK1.pS241           | PDK1-phospho ser241          | PDK1   | pyruvate dehydrogenase kinase, isozyme 1                                | Activation   | PDK1-p241(Ser)            | Cell Signaling   | 3061      | Rabbit | 500      | 15000 | mtor                    | 0.7411 | 0.056  | 0.5279 | 0.243  |
| PIK3CA               | PIK3CA                       | PIK3CA | phosphatidylinositol-4,5-bisphosphate 3-kinase, catalytic subunit alpha |              | PI3 K p110-alpha          | Epitomics        | 1683-1    | Rabbit | 200      | 15000 | mtor                    | 0.3452 | 0.026  | 0.0000 | -0.050 |
| PIK3R1_2             | PIK3R1/PIK3R2                | PIK3R1 | phosphoinositide-3-kinase, regulatory subunit 1 (alpha)                 |              | PI3 K p85                 | Cell Signaling   | 4292      | Rabbit | 20       | 15000 | mtor                    | 0.0674 | 0.074  | 0.0000 | 0.749  |
| PIM1                 | PIM1                         | PIM1   | pim-1 oncogene                                                          |              | PIM1                      | Santa Cruz       | sc-13153  | mouse  | 100      | 15000 | differentiation         | 0.0576 | -0.137 | 0.0065 | -0.305 |
| PIM2                 | PIM2                         | PIM2   | pim-2 oncogene                                                          |              | PIM2                      | Cell Signaling   | 4730      | Rabbit | 200      | 15000 | differentiation         | 0.0107 | 0.145  | 0.0000 | -0.211 |
| PPARA                | PPARA                        | PPARA  | peroxisome proliferator-activated receptor alpha                        |              | PPARA                     | boster Bio       | PA1412    | Rabbit | 0.5ug/ul | 30000 | metabolic               | 0.7654 | 0.197  | 0.0000 | 0.396  |
| PPARG                | PPARG                        | PPARG  | peroxisome proliferator-activated receptor gamma                        |              | PPARγ                     | Santa Cruz       | sc7273    | mouse  | 75       | 15000 | differentiation         | 0.1336 | 0.126  | 0.6570 | 0.985  |

|                    |                                 |         |                                                                                         |              |                                         |                |          |        |           |       |           |        |        |        |        |
|--------------------|---------------------------------|---------|-----------------------------------------------------------------------------------------|--------------|-----------------------------------------|----------------|----------|--------|-----------|-------|-----------|--------|--------|--------|--------|
| PPP2R2A_B_C_D      | PPP2R2D/PPP2R2A/PPP2R2B/PPP2R2C | PPP2R4  | protein phosphatase 2A activator, regulatory subunit 4                                  |              | PP2A-B55                                | Santa Cruz     | sc-18330 | goat   | 500       | 15000 | STP       | 0.5336 | -0.023 | 0.0000 | 0.531  |
| PRKAA1_2           | PRKAA1/PRKAA2                   | PRKAA1  | protein kinase, AMP-activated, alpha 1 catalytic subunit                                |              | AMPK $\alpha$                           | cell signaling | 2532     | Rabbit | 200       | 15000 | autophagy | 0.2778 | 0.116  | 0.0000 | 0.034  |
| PRKAA1_2_pT172     | PRKAA1/PRKAA2-phospho Thr172    | PRKAA1  | protein kinase, AMP-activated, alpha 1 catalytic subunit                                | Activation   | AMPK $\alpha$ P(Thr172)                 | cell signaling | 2535     | Rabbit | 200       | 15000 | autophagy | 0.3911 | -0.047 | 0.0000 | -0.911 |
| PRKCA              | PRKCA                           | PRKCA   | protein kinase C, alpha                                                                 |              | PKC $\alpha$                            | Upstate        | 05-154   | mouse  | 2000      | 15000 | pkc       | 0.4760 | -0.084 | 0.0000 | 0.531  |
| PRKCA.pS657        | PRKCA-phosphoser657             | PRKCA   | protein kinase C, alpha                                                                 | Activation   | PKC $\alpha$ -p657(Ser)                 | Upstate        | 06-822   | Rabbit | 1000      | 20000 | pkc       | 0.1128 | -0.067 | 0.0000 | -0.540 |
| PRKCB.I            | PRKCB                           | PRKCB   | protein kinase C, beta                                                                  |              | PKC $\beta$ I                           | Santa Cruz     | sc8049   | mouse  | 300       | 20000 | pkc       | 0.3429 | 0.056  | 0.0520 | 1.239  |
| PRKCB.II           | PRKCB                           | PRKCB   | protein kinase C, beta                                                                  |              | PKC $\beta$ II                          | Santa Cruz     | 13149    | mouse  | 200       | 15000 | pkc       | 0.2902 | 0.124  | 0.0000 | 0.739  |
| PRKCD.pS645        | PRKCD-phospho Ser645            | PRKCD   | protein kinase C, delta                                                                 |              | PKC $\delta$ -645(Ser)                  | Upstate        | 07-875   | Rabbit | 200       | 30000 | pkc       | 0.0277 | 0.073  | 0.0000 | -0.155 |
| PRKCD.pS664        | PRKCD-phospho Ser664            | PRKCD   | protein kinase C, delta                                                                 |              | PKC $\delta$ -p664(Ser)                 | Upstate        | 07-874   | Rabbit | 250       | 30000 | pkc       | 0.0644 | 0.082  | 0.0000 | 1.445  |
| PRKCD.pT507        | PRKCD-phospho Thr507            | PRKCD   | protein kinase C, delta                                                                 | Activation   | PKC $\delta$ -507(Thr)                  | Santa Cruz     | sc11770  | Goat   | 1000      | 30000 | pkc       | 0.6354 | -0.168 | 0.0000 | 0.904  |
| PTEN               | PTEN                            | PTEN    | phosphatase and tensin homolog                                                          |              | PTEN                                    | Upstate        | 07-016   | Rabbit | 400       | 15000 | mtor      | 0.5910 | 0.146  | 0.0000 | 0.926  |
| PTEN.pS380T382T383 | PTEN                            | PTEN    | phosphatase and tensin homolog                                                          | Inactivation | PTEN-p(380/382/383)                     | Cell Signaling | 9554     | Rabbit | 500       | 15000 | mtor      | 0.2099 | -0.038 | 0.0000 | 0.711  |
| PTGS2              | PTGS2                           | PTGS2   | prostaglandin-endoperoxide synthase 2 (prostaglandin G/H synthase and cyclooxygenase)   |              | cox-2                                   | Epitomics      | 2169-1   | Rabbit | 250       | 15000 | metabolic | 0.4956 | -0.042 | 0.0000 | -0.948 |
| PTK2               | PTK2                            | PTK2    | protein tyrosine kinase 2                                                               |              | Fak                                     | Cell Signaling | 3285     | Rabbit | 500       | 15000 | adhesion  | 0.6867 | -0.099 | 0.0000 | -0.961 |
| PTPN11             | PTPN11                          | PTPN11  | protein tyrosine phosphatase, non-receptor type 11                                      |              | SHP-2                                   | Epitomics      | 1590-1   | Rabbit | 500       | 15000 | STP       | 0.0386 | 0.054  | 0.0000 | 0.535  |
| RAC1_2_3           | RAC1/RAC2/RAC3                  | RAC1    | ras-related C3 botulinum toxin substrate 1 (rho family, small GTP binding protein Rac1) |              | Rac1/2/3                                | Cell Signaling | 2465     | Rabbit | 500       | 15000 | mek       | 0.0028 | 0.031  | 0.0000 | 1.237  |
| RB1                | RB1                             | RB1     | retinoblastoma 1                                                                        |              | Rb                                      | BD PharMingen  | 554136   | mouse  | 100       | 15000 | cellcycle | 0.0527 | 0.163  | 0.0000 | -1.639 |
| RB1.pS807_811      | RB1-phosphoser807/811           | RB1     | retinoblastoma 1                                                                        | Inactivation | Rb (P-Ser807/811)                       | Cell Signaling | 9308     | Rabbit | 250       | 15000 | cellcycle | 0.0000 | -0.233 | 0.0000 | 0.991  |
| RELA               | RELA                            | NFKB1   | v-rel avian reticuloendotheliosis viral oncogene homolog A                              |              | NF-kB p65                               | Cell Signaling | 3034     | Rabbit | 500       | 15000 | pkc       | 0.5268 | -0.152 | 0.0000 | -1.006 |
| RPS6               | RPS6                            | RPS6    | ribosomal protein S6                                                                    |              | S6 Ribosomal protein                    | Cell Signaling | 2217     | Rabbit | 250       | 15000 | s6rp      | 0.0003 | -0.639 | 0.0001 | -1.611 |
| RPS6.pS235_236     | RPS6-phosphoser235/236          | RPS6    | ribosomal protein S6                                                                    | Activation   | S6 Ribosomal protein(phosphoser235/236) | Cell Signaling | 2211     | Rabbit | 1500-2000 | 15000 | s6rp      | 0.0000 | -0.050 | 0.0000 | 0.625  |
| RPS6.pS240_244     | RPS6-phosphoser240/244          | RPS6    | ribosomal protein S6                                                                    | Activation   | S6 Ribosomal protein(phosphoser240/244) | Cell Signaling | 2215     | Rabbit | 750-1000  | 15000 | s6rp      | 0.3893 | -0.281 | 0.0000 | -0.307 |
| RPS6KB1            | RPS6KB1                         | RPS6KB1 | ribosomal protein S6 kinase, 70kDa, polypeptide 1                                       |              | p70S6K                                  | Cell Signaling | 9202     | Rabbit | 250       | 15000 | s6rp      | 0.0000 | -0.501 | 0.3723 | -0.418 |
| RPS6KB1.pT389      | RPS6KB1-phospho thr389          | RPS6KB1 | ribosomal protein S6 kinase, 70kDa, polypeptide 1                                       | Activation   | p70S6K(p-thr389)                        | Cell Signaling | 9205     | Rabbit | 250       | 15000 | s6rp      | 0.0000 | -0.069 | 0.0857 | 0.727  |

|             |                     |        |                                                                                  |              |                       |                   |          |        |      |       |                 |        |        |        |        |
|-------------|---------------------|--------|----------------------------------------------------------------------------------|--------------|-----------------------|-------------------|----------|--------|------|-------|-----------------|--------|--------|--------|--------|
| SFN         | SFN                 | SFN    | stratifin                                                                        |              | X14.3.3Sigma          | Upstate           | 05-632   | mouse  | 200  | 15000 | tp53            | 0.7464 | -0.357 | 0.0000 | 0.070  |
| SIRT1       | SIRT1               | SIRT1  | sirtuin 1                                                                        |              | SIRT1                 | Abcam             | ab32441  | Rabbit | 1000 | 15000 | histone         | 0.1331 | -0.421 | 0.0000 | -0.134 |
| SMAD1       | SMAD1               | SMAD1  | SMAD family member 1                                                             |              | smad1                 | Epitomics         | 1649-1   | Rabbit | 200  | 15000 | smad            | 0.1681 | -0.025 | 0.0000 | -0.519 |
| SMAD2       | SMAD2               | SMAD2  | SMAD family member 2                                                             |              | SMAD2                 | Cell Signaling    | 5339     | Rabbit | 5000 | 15000 | smad            | 0.6904 | -0.117 | 0.0000 | -0.674 |
| SMAD2.pS245 | SMAD2.p245          | SMAD2  | SMAD family member 2                                                             | Activation   | Smad2-pS245/250/255   | Cell Signaling    | 3104     | Rabbit | 500  | 15000 | smad            | 0.7130 | 0.108  | 0.0000 | -1.214 |
| SMAD2.pS465 | SMAD2.pS465         | SMAD2  | SMAD family member 2                                                             | Activation   | Smad2-pS465/467       | Cell Signaling    | 3108     | Rabbit | 1000 | 15000 | smad            | 0.8132 | -0.031 | 0.0079 | -0.811 |
| SMAD3       | SMAD3               | SMAD3  | SMAD family member 3                                                             |              | SMAD3                 | Cell Signaling    | 9523     | Rabbit | 500  | 15000 | smad            | 0.7179 | -0.029 | 0.0020 | -0.953 |
| SMAD4       | SMAD4               | SMAD4  | SMAD family member 4                                                             |              | smad4                 | Santa Cruz        | sc7966   | mouse  | 1000 | 15000 | smad            | 0.6291 | -0.018 | 0.0000 | -0.202 |
| SMAD5       | SMAD5               | SMAD5  | SMAD family member 5                                                             |              | SMAD5                 | epitomics         | 1682-1   | Rabbit | 1000 | 15000 | smad            | 0.5207 | 0.028  | 0.0000 | -0.245 |
| SMAD5.pS463 | SMAD5pS463          | SMAD5  | SMAD family member 5                                                             | Activation   | Smad5-pS463/465       | epitomics         | 2224-1   | Rabbit | 500  | 15000 | smad            | 0.6227 | -0.038 | 0.0000 | -1.145 |
| SMAD6       | SMAD6               | SMAD6  | SMAD family member 6                                                             |              | Smad6                 | Cell Signaling    | 9519     | Rabbit | 100  | 15000 | smad            | 0.4579 | -0.050 | 0.0000 | -0.938 |
| SOCS2       | SOCS2               | SOCS2  | suppressor of cytokine signaling 2                                               |              | SOCS2                 | Abcam             | ab92847  | Rabbit | 200  | 15000 | STP             | 0.5535 | -0.037 | 0.0002 | 0.508  |
| SPI1        | SPI1                | SPI1   | spleen focus forming virus (SFFV) proviral integration oncogene                  |              | PU.1                  | Cell Signaling    | 2258     | Rabbit | 5000 | 15000 | transcription   | 0.0677 | 0.056  | 0.0049 | 0.309  |
| SPP1        | SPP1                | SPP1   | secreted phosphoprotein 1                                                        |              | Osteopontin           | Santa Cruz        | sc-21742 | mouse  | 500  | 15000 | adhesion        | 0.9421 | 0.045  | 0.0075 | -0.274 |
| SQSTM1      | SQSTM1              | SQSTM1 | sequestosome 1                                                                   |              | P62                   | Santa Cruz        | sc-28359 | mouse  | 250  | 15000 | autophagy       | 0.6072 | -0.146 | 0.0000 | -0.217 |
| SRC         | SRC                 | SRC    | v-src avian sarcoma (Schmidt-Ruppin A-2) viral oncogene homolog                  |              | Src                   | Upstate           | 05-184   | mouse  | 600  | 15000 | src             | 0.1605 | -0.006 | 0.0000 | 0.205  |
| SRC.pY416   | SRC-phosphoty416    | SRC    | v-src avian sarcoma (Schmidt-Ruppin A-2) viral oncogene homolog                  | Activation   | Src(phosphoty416)     | Cell Signaling    | 2101     | Rabbit | 400  | 15000 | src             | 0.5570 | 0.040  | 0.0000 | -0.442 |
| SRC.pY527   | SRC-phosphoty527    | SRC    | v-src avian sarcoma (Schmidt-Ruppin A-2) viral oncogene homolog                  | Inactivation | Src(phosphoty527)     | Cell Signaling    | 2105     | Rabbit | 100  | 15000 | src             | 0.2572 | 0.109  | 0.0000 | 1.422  |
| SSBP2       | SSBP2               | SSBP2  | single-stranded DNA binding protein 2                                            |              | SSBP2-I(alpha)        | Private-Nagarajan |          | Rabbit | 1000 | 15000 | differentiation | 0.8414 | 0.045  | 0.0000 | 1.948  |
| STAT1       | STAT1               | STAT1  | signal transducer and activator of transcription 1, 91kDa                        |              | stat1                 | Cell Signaling    | 9172     |        | 250  | 15000 | stat            | 0.8608 | 0.089  | 0.0000 | 1.241  |
| STAT1.pY701 | STAT1-phosphoty701  | STAT1  | signal transducer and activator of transcription 1, 91kDa                        | Activation   | Stat1(phospho-tyr701) | Cell Signaling    | 9171     | Rabbit | 100  | 15000 | stat            | 0.1893 | 0.016  | 0.0021 | -1.031 |
| STAT3       | STAT3               | STAT3  | signal transducer and activator of transcription 3 (acute-phase response factor) |              | Stat3                 | Upstate           | 06-596   | Rabbit | 50   | 15000 | stat            | 0.4588 | 0.014  | 0.0000 | 0.767  |
| STAT3.pS727 | STAT3-phosphoser727 | STAT3  | signal transducer and activator of transcription 3 (acute-phase response factor) | Activation   | Stat3-p727(Ser)       | Cell Signaling    | 9134     | Rabbit | 100  | 15000 | stat            | 0.7732 | 0.101  | 0.2176 | 0.239  |
| STAT3.pY705 | STAT3-phosphoty705  | STAT3  | signal transducer and activator of transcription 3 (acute-phase response factor) | Activation   | Stat3-p705(Tyr)       | Cell Signaling    | 9131     | Rabbit | 500  | 15000 | stat            | 0.1145 | 0.058  | 0.0012 | -0.433 |
| STAT5A_B    | STAT5A/STAT5B       | STAT5A | signal transducer and activator of transcription 5A                              |              | Stat5                 | Cell Signaling    | 9352     | Rabbit | 250  | 15000 | stat            | 0.4673 | -0.022 | 0.0000 | 0.092  |

|                |                               |        |                                                                                                   |                     |                       |                          |            |        |       |       |                          |        |        |        |        |
|----------------|-------------------------------|--------|---------------------------------------------------------------------------------------------------|---------------------|-----------------------|--------------------------|------------|--------|-------|-------|--------------------------|--------|--------|--------|--------|
| STAT5A_B.pY694 | STAT5A/STAT5 B phospho Tyr694 | STAT5A | signal transducer and activator of transcription 5A                                               | Activation          | Stat5(phospho-Tyr694) | Cell Signaling           | 9351       | Rabbit | 100   | 15000 | stat                     | 0.1052 | 0.121  | 0.0000 | 0.251  |
| STAT6.pY641    | STAT6-phospho tyr641          | STAT6  | signal transducer and activator of transcription 6, interleukin-4 induced                         | Activation          | Stat6(phospho-tyr641) | Cell Signaling           | 9361       | Rabbit | 100   | 10000 | stat                     | 0.9019 | 0.055  | 0.0000 | -0.642 |
| STK11          | STK11                         | STK11  | serine/threonine kinase 11                                                                        |                     | LKB1/STK11            | Cell Signaling           | 3050       | Rabbit | 500   | 15000 | autophagy                | 0.7446 | 0.127  | 0.0000 | 0.622  |
| STMN1          | STMN1                         | STMN1  | stathmin 1                                                                                        |                     | Stathmin              | epitomics                | 1972-1     | Rabbit | 30000 | 15000 | fli1                     | 0.0124 | -0.010 | 0.0000 | 0.420  |
| TCF4           | TCF4                          | TCF4   | transcription factor 4                                                                            |                     | TCF-4                 | Santa Cruz               | sc8632     | goat   | 400   | 15000 | transcription            | 0.9364 | -0.026 | 0.0000 | -0.803 |
| TGM2           | TGM2                          | TGM2   | transglutaminase 2                                                                                |                     | TG2                   | Abcam                    | ab2386     | mouse  | 2000  | 30000 | adhesion                 | 0.5722 | -0.193 | 0.1825 | -2.355 |
| TNK1           | TNK1                          | TNK1   | tyrosine kinase, non-receptor, 1                                                                  |                     | TNK1                  | Agent                    | AP7722a    | Rabbit | 400   | 15000 | mek                      | 0.1014 | -0.006 | 0.0004 | 1.070  |
| TP53           | TP53                          | TP53   | tumor protein p53                                                                                 |                     | TP53                  | Cell Signaling           | 9282       | Rabbit | 1000  | 15000 | ApopReg, tp53            | 0.3966 | 0.045  | 0.0050 | 0.105  |
| TP53.pS15      | TP53-pS15                     | TP53   | tumor protein p53                                                                                 | Blocks MDM2 binding | TP53(phospho Ser 15)  | Cell Signaling           | 9284       | Rabbit | 250   | 15000 | ApopReg, tp53            | 0.8883 | 0.131  | 0.0000 | -0.278 |
| TRIM24         | TRIM24                        | TRIM24 | tripartite motif containing 24                                                                    |                     | TRIM24                | Novus                    | NB100-2597 | Rabbit | 1000  | 15000 | histone, tp53, ubiquitin | 0.2333 | -0.066 | 0.0000 | -0.219 |
| TRIM62         | TRIM62                        | TRIM62 | tripartite motif containing 62                                                                    |                     | TRIM62                | from Dr. Quintas-cardama | DEAR1      | mouse  | 150   | 15000 | ubiquitin                | 0.5946 | -0.011 | 0.0026 | 0.471  |
| TSC2           | TSC2                          | TSC2   | tuberous sclerosis 2                                                                              |                     | TSC2                  | epitomic                 | 1613-1     | Rabbit | 500   | 15000 | autophagy, mtor          | 0.2358 | 0.094  | 0.0000 | -0.642 |
| VASP           | VASP                          | VASP   | vasodilator-stimulated phosphoprotein                                                             |                     | VASP                  | Cell Signaling           | 3112       | Rabbit | 250   | 15000 | hypoxia                  | 0.1090 | 0.041  | 0.0000 | -0.224 |
| VHL            | VHL                           | VHL    | von Hippel-Lindau tumor suppressor, E3 ubiquitin protein ligase                                   |                     | VHL                   | Novus                    | NB100-485  | Rabbit | 2000  | 15000 | hypoxia                  | 0.5126 | -0.092 | 0.0000 | -0.925 |
| WTAP           | WTAP                          | WTAP   | Wilms tumor 1 associated protein                                                                  |                     | WTAP                  | sanjay bansal            | from UTSA  | Rabbit | 10000 | 15000 | cellcycle, fli1, histone | 0.0855 | 0.126  | 0.0000 | 0.847  |
| WWTR1          | TAZ                           | TAZ    | WW Domain Containing Transcription Regulator 1/Transcriptional Coactivator With PDZ-Binding Motif |                     | TAZ                   | Abcam                    | ab3961     | Rabbit | 1000  | 15000 | hippo                    | 0.1509 | -0.051 | 0.1403 | -1.664 |
| WWTR1.pS89     | TAZ-phospho Ser89             | TAZ    | WW Domain Containing Transcription Regulator 1/Transcriptional Coactivator With PDZ-Binding Motif | Inactivation        | TAZ p-Ser89           | Santa Cruz               | sc17610R   | Rabbit | 150   | 15000 | hippo                    | 0.0000 | -0.138 | 0.0000 | -0.463 |
| XIAP           | XIAP                          | BIRC4  | X-linked inhibitor of apoptosis                                                                   |                     | XIAP                  | Cell Signaling           | 2042       | Rabbit | 100   | 15000 | IAP                      | 0.8860 | 0.110  | 0.0000 | -0.111 |
| XPO1           | XPO1                          | XPO1   | exportin 1 (CRM1 homolog, yeast)                                                                  |                     | CRM1                  | Santa Cruz               | sc-5595    | Rabbit | 2000  | 15000 | cytoskeletal             | 0.7656 | 0.349  | 0.0003 | -0.436 |
| YAP1           | YAP1                          | YAP1   | Yes-associated protein 1                                                                          |                     | YAP                   | Cell Signaling           | 4912       | Rabbit | 100   | 15000 | ApopReg, hippo           | 0.7281 | 0.011  | 0.0011 | -0.460 |
| YAP1.p         | YAP1 phospho Serine 127       | YAP1   | Yes-associated protein 1                                                                          | Inactivation        | YAP-p(ser127)         | Cell Signaling           | 4911       | Rabbit | 500   | 15000 | ApopReg, hippo           | 0.5198 | 0.023  | 0.0000 | -0.276 |
| YWHAE          | YWHAE                         | YWHAE  | tyrosine 3-monooxygenase/tryptophan 5-monooxygenase activation protein, epsilon polypeptide       |                     | X14.3.3Epsilon        | Santa Cruz               | sc-23957   | mouse  | 200   | 15000 | tp53                     | 0.1673 | 0.027  | 0.0416 | 0.257  |
| YWHAZ          | YWHAZ                         | YWHAZ  | tyrosine 3-monooxygenase/tryptophan 5-monooxygenase activation protein, zeta polypeptide          |                     | 14-3-3-zeta           | chemicon                 | AB9746     | Rabbit | 750   | 20000 | tp53                     | 0.0998 | -0.050 | 0.0092 | 1.333  |
| ZNF296         | ZNF296                        | ZNF296 | zinc finger protein 296                                                                           |                     | ZNF342                | abcam                    | ab51265    | Rabbit | 1000  | 15000 | transcription            | 0.2069 | -0.107 | 0.0000 | -0.161 |

|        |        |        |                         |  |        |         |  |        |      |       |               |        |       |        |       |
|--------|--------|--------|-------------------------|--|--------|---------|--|--------|------|-------|---------------|--------|-------|--------|-------|
| ZNF346 | ZNF346 | ZNF346 | zinc finger protein 346 |  | JAZ111 | May-UFL |  | Rabbit | 1000 | 15000 | transcription | 0.0305 | 0.127 | 0.0986 | 0.194 |
|--------|--------|--------|-------------------------|--|--------|---------|--|--------|------|-------|---------------|--------|-------|--------|-------|

**Table S2. Correlation between post-translational modifications (PTMs) and total protein expression levels. PCC: Pearson correlation coefficient. n = 205.**

| Post-translational Modifications | Total Proteins | PCC    | p-value |
|----------------------------------|----------------|--------|---------|
| BAD.pS112                        | BAD            | -0.293 | 0.000   |
| GAB2.pY452                       | GAB2           | -0.142 | 0.042   |
| CTNNB1.pS33 37 41                | CTNNB1         | -0.083 | 0.238   |
| BAD.pS155                        | BAD            | -0.077 | 0.272   |
| FOXO3.S318 321                   | FOXO3          | -0.075 | 0.287   |
| BAD.pS136                        | BAD            | -0.030 | 0.668   |
| EIF2AK2.pT451                    | EIF2AK2        | -0.024 | 0.730   |
| STAT1.pY701                      | STAT1          | -0.021 | 0.764   |
| AKT1 2 3.pT308                   | AKT1           | -0.017 | 0.814   |
| ERBB2.pY1248                     | ERBB2          | -0.012 | 0.866   |
| EIF4EBP1.pS65                    | EIF4EBP1       | 0.009  | 0.893   |
| EGFR.pY992                       | EGFR           | 0.023  | 0.747   |
| RPS6.pS235 236                   | RPS6           | 0.035  | 0.623   |
| YAP1.p                           | YAP1           | 0.064  | 0.362   |
| STAT5A B.pY694                   | STAT5A B       | 0.069  | 0.329   |
| PRKAA1 2.pT172                   | PRKAA1 2       | 0.070  | 0.318   |
| EIF2S1.pS51.                     | EIF2S1         | 0.087  | 0.216   |
| SMAD2.pS465                      | SMAD2          | 0.094  | 0.181   |
| STAT3.pY705                      | STAT3          | 0.095  | 0.177   |
| STAT3.pS727                      | STAT3          | 0.111  | 0.115   |
| SMAD2.pS245                      | SMAD2          | 0.118  | 0.092   |
| MAPK14.pT180Y182                 | MAPK14         | 0.138  | 0.048   |
| NF2.pS518                        | NF2            | 0.141  | 0.043   |
| MAP2K1 2.pS217 221               | MAP2K1         | 0.161  | 0.021   |
| AKT1 2 3.pS473                   | AKT1           | 0.192  | 0.006   |
| MAPK1 3.pT202Y204                | MAPK1          | 0.200  | 0.004   |
| CDKN1B.pS10                      | CDKN1B         | 0.206  | 0.003   |
| GSKA B.pS21 9                    | GSKA B         | 0.256  | 0.000   |
| RPS6.pS240 244                   | RPS6           | 0.292  | 0.000   |
| MTOR.pS2448                      | MTOR           | 0.293  | 0.000   |
| WWTR1.pS89                       | WWTR1          | 0.315  | 0.000   |
| TP53.pS15                        | TP53           | 0.324  | 0.000   |
| SMAD5.pS463                      | SMAD5          | 0.344  | 0.000   |
| CREB1.pS133                      | CREB1          | 0.379  | 0.000   |
| EIF4EBP1.pT37 46                 | EIF4EBP1       | 0.380  | 0.000   |
| CASP3.cl175                      | CASP3          | 0.385  | 0.000   |



|                    |           |       |       |
|--------------------|-----------|-------|-------|
| EIF4EBP1.pT70      | EIF4EBP1  | 0.406 | 0.000 |
| H3K27Me3           | H3histone | 0.478 | 0.000 |
| PDK1.pS241         | PDK1      | 0.509 | 0.000 |
| H3K4Me3            | H3histone | 0.618 | 0.000 |
| RB1.pS807 811      | RB1       | 0.657 | 0.000 |
| H3K4Me2            | H3histone | 0.697 | 0.000 |
| SRC.pY416          | SRC       | 0.739 | 0.000 |
| PRKCA.pS657        | PRKCA     | 0.798 | 0.000 |
| SRC.pY527          | SRC       | 0.804 | 0.000 |
| PTEN.pS380T382T383 | PTEN      | 0.835 | 0.000 |
| RPS6KB1.pT389      | RPS6KB1   | 0.890 | 0.000 |

**Table S3. Functional group memberships.**

| Functional Group | Antibodies                                                                                                                                                            |
|------------------|-----------------------------------------------------------------------------------------------------------------------------------------------------------------------|
| Adhesion         | CAV1, TGM2, ITGB3, ITGA2, FN1, PTK2, IGFBP2, ITGAL, SPP1, CD44, CTSG                                                                                                  |
| ApopOccur        | CASP3, CASP3.cl175, CASP7.cl198, CASP8, CASP9.cl315, CASP9.cl330, PARP1, PARP1.cl214                                                                                  |
| ApopReg          | AIFM1, NOL3, YAP1, YAP1.p, TP53, TP53.pS15                                                                                                                            |
| autophagy        | PARK7, GSKA_B, TSC2, STK11, GSKA_B.pS21_9, ATG7, BECN1, ATF3, PRKAA1_2, PRKAA1_2.pT172, SQSTM1                                                                        |
| BH3              | NOL3, BAD, BAD.pS155, BAD.pS112, BAD.pS136, BAK1, BCL2, BCL2L1, BCL2L11, BID, BAX, MCL1                                                                               |
| cellcycle        | CCNB1, CCND1, CCND3, CCNE1, CDK1, CDK2, CDK4, CDKN1A, CDKN2A, FOXO3.S318_321, MYC, CDKN1B, CCNE2, FOXO1.pT24_FOXO3.pT32, CDKN1B.pS10, RB1, WTAP, FOXO3, RB1.pS807_811 |
| creb             | ATF3, CREB1, CREB1.pS133                                                                                                                                              |
| cytoskeletal     | XPO1, MAPT, NRPI, NF2.pS518, NF2, ACTB                                                                                                                                |
| differentiation  | GATA1, GATA3, PIM1, PIM2, PPARG, SSBP2                                                                                                                                |
| fli1             | NCL, NPM1.3542, STMN1, WTAP, FLI1                                                                                                                                     |
| heatshock        | HSP90AA1_B1, HSPB1, HSPA1A_L                                                                                                                                          |
| hippo            | WWTR1.pS89, YAP1, NF2.pS518, WWTR1, NF2, YAP1.p                                                                                                                       |
| histone          | H3K4Me3, H3K4Me2, H3histone, BMI1, HDAC3, KDM1A, ASH2L, WTAP, FLI1, NCL, HNRNPK, HDAC1, TRIM24, SIRT1, HDAC2, H3K27Me3, CLPP, JMJD6, NPM1, BRD4                       |
| hypoxia          | VASP, VHL, EGLN1, HIF1A, KDR                                                                                                                                          |
| IAP              | BIRC2, BIRC5, DIABLO, XIAP                                                                                                                                            |
| mapk             | MAP2K1, MAP2K1_2.pS217_221, MAPK1, MAPK1_3.pT202Y204, MAPK14, MAPK14.pT180Y182, MAPK9                                                                                 |
| mek              | DUSP6, BRAF, ELK1.pS383, RAC1_2_3, TNK1, KIT, LYN                                                                                                                     |
| metabolic        | ASNS, ODC1, PPARA, PTGS2, GAPDH                                                                                                                                       |
| mtor             | MTOR, MTOR.pS2448, PDK1, PDK1.pS241, PIK3CA, PIK3R1_2, PTEN, PTEN.pS380T382T383, TSC2, EGFR, EGFR.pY992, INPP5D, INPPL1, IRS1.pS1101                                  |
| pi3kakt          | AKT1, AKT1_2_3.pS473, AKT1_2_3.pT308, ELK1.pS383, FOXO1.pT24_FOXO3.pT32, FOXO3, FOXO3.S318_321, GAB2, GAB2.pY452, GSKA_B, GSKA_B.pS21_9                               |
| pkc              | PRKCD.pS664, PRKCD.pS645, PRKCD.pT507 PRKCB.I, PRKCB.II, PRKCA.pS657, PRKCA, RELA                                                                                     |
| s6rp             | RPS6, RPS6.pS235_236, RPS6.pS240_244, EIF4EBP1, EIF4EBP1.pS65, EIF4EBP1.pT37_46, EIF4EBP1.pT70, RPS6KB1, RPS6KB1.pT389                                                |
| smad             | SMAD6, SMAD4, SMAD2.pS245, SMAD3, SMAD5, SMAD2, SMAD5.pS463, SMAD2.pS465, SMAD1                                                                                       |
| src              | SRC, SRC.pY416, SRC.pY527                                                                                                                                             |
| stat             | MAPK9, STAT3.pY705, STAT3.pS727, STAT1.pY701, STAT5A_B.pY694, STAT6.pY641, STAT5A_B, STAT1, STAT3                                                                     |
| STP              | ERBB2, ERBB2.pY1248, ERBB3, IGF1R, EGFR, MET.pY1230_1234_1235, PTPN11, PPP2R2A_B_C_D, KIT, LYN, SOCS2                                                                 |
| tcell            | CD74, LCK, LGALS3, NOTCH1.cl1744, NOTCH3                                                                                                                              |
| tp53             | YWHAE, IRS1.pS1101, SFN, TRIM24, MDM4, MDM2, TP53.pS15, TP53, YWHAZ                                                                                                   |
| transcription    | GATA3, ZNF296, NR4A1, JUN.pS73, MYC, ERG, EIF2AK2.pT451, EIF2AK2, EIF4E, EIF2S1, TCF4, EIF2S1.pS51., GATA1, JUNB, ZNF346, SPI1, DLX1                                  |
| ubiquitin        | TRIM24, COPS5, CBL, TRIM62                                                                                                                                            |
| wnt              | LEF1, CTNNB1, CTNNB1.pS33_37_41, CTNNA1                                                                                                                               |

**Table S4. Constellation memberships for functional patterns.**

| Constellation | Functional Pattern |
|---------------|--------------------|
| 1             | cellcycle.C5       |
| 2             | fli1.C2            |
| 2             | hippo.C2           |
| 2             | src.C2             |
| 2             | ubiquitin.C2       |
| 3             | adhesion.C5        |
| 3             | ApopOccur.C1       |
| 3             | ApopReg.C2         |
| 3             | autophagy.C5       |
| 3             | BH3.C5             |
| 3             | cellcycle.C4       |
| 3             | creb.C2            |
| 3             | cytoskeletal.C2    |
| 3             | differentiation.C2 |
| 3             | histone.C2         |
| 3             | hypoxia.C1         |
| 3             | mapk.C1            |
| 3             | mek.C3             |
| 3             | metabolic.C1       |
| 3             | mtor.C4            |
| 3             | pi3kakt.C4         |
| 3             | pkc.C5             |
| 3             | s6rp.C4            |
| 3             | stat.C5            |
| 3             | STP.C1             |
| 3             | tcell.C1           |
| 3             | tp53.C2            |
| 3             | transcription.C1   |
| 3             | wnt.C4             |
| 4             | heatshock.C8       |
| 5             | differentiation.C3 |
| 5             | mek.C4             |
| 5             | pkc.C1             |
| 5             | smad.C4            |
| 5             | STP.C3             |
| 5             | tcell.C6           |
| 5             | transcription.C3   |

|   |                    |
|---|--------------------|
| 6 | ApopReg.C3         |
| 6 | fli1.C1            |
| 6 | hippo.C1           |
| 6 | histone.C1         |
| 6 | hypoxia.C3         |
| 6 | mek.C1             |
| 6 | pi3kakt.C1         |
| 6 | src.C1             |
| 6 | ubiquitin.C1       |
| 7 | adhesion.C2        |
| 7 | ApopOccur.C3       |
| 7 | ApopReg.C1         |
| 7 | autophagy.C2       |
| 7 | BH3.C2             |
| 7 | cellcycle.C3       |
| 7 | creb.C1            |
| 7 | cytoskeletal.C1    |
| 7 | differentiation.C5 |
| 7 | heatshock.C5       |
| 7 | IAP.C1             |
| 7 | mapk.C4            |
| 7 | metabolic.C3       |
| 7 | mtor.C2            |
| 7 | pkc.C2             |
| 7 | s6rp.C3            |
| 7 | s6rp.C6            |
| 7 | smad.C3            |
| 7 | STP.C2             |
| 7 | tp53.C1            |
| 7 | tp53.C3            |
| 7 | transcription.C4   |
| 7 | wnt.C2             |
| 8 | adhesion.C3        |
| 8 | ApopOccur.C4       |
| 8 | ApopOccur.C7       |
| 8 | autophagy.C1       |
| 8 | BH3.C1             |
| 8 | creb.C3            |

|    |                    |
|----|--------------------|
| 8  | differentiation.C1 |
| 8  | heatshock.C3       |
| 8  | histone.C5         |
| 8  | hypoxia.C2         |
| 8  | IAP.C2             |
| 8  | IAP.C4             |
| 8  | mek.C5             |
| 8  | mtor.C3            |
| 8  | pi3kakt.C2         |
| 8  | pkc.C3             |
| 8  | smad.C5            |
| 8  | stat.C4            |
| 8  | tcell.C4           |
| 9  | adhesion.C1        |
| 9  | ApopOccur.C2       |
| 9  | BH3.C3             |
| 9  | BH3.C4             |
| 9  | cytoskeletal.C4    |
| 9  | heatshock.C2       |
| 9  | hypoxia.C4         |
| 9  | IAP.C5             |
| 9  | mapk.C2            |
| 9  | mapk.C3            |
| 9  | mapk.C5            |
| 9  | metabolic.C2       |
| 9  | metabolic.C4       |
| 9  | mtor.C1            |
| 9  | s6rp.C2            |
| 9  | smad.C1            |
| 9  | stat.C1            |
| 9  | stat.C2            |
| 9  | stat.C3            |
| 9  | tcell.C3           |
| 9  | tcell.C5           |
| 9  | ubiquitin.C3       |
| 9  | wnt.C3             |
| 10 | ApopOccur.C5       |
| 10 | ApopReg.C4         |
| 10 | autophagy.C3       |
| 10 | autophagy.C4       |

|    |                    |
|----|--------------------|
| 10 | cellcycle.C1       |
| 10 | cellcycle.C6       |
| 10 | cytoskeletal.C5    |
| 10 | heatshock.C1       |
| 10 | heatshock.C7       |
| 10 | hippo.C3           |
| 10 | histone.C4         |
| 10 | IAP.C6             |
| 10 | metabolic.C5       |
| 10 | metabolic.C6       |
| 10 | metabolic.C7       |
| 10 | mtor.C5            |
| 10 | mtor.C6            |
| 10 | pi3kakt.C3         |
| 10 | s6rp.C1            |
| 10 | s6rp.C5            |
| 10 | tp53.C4            |
| 10 | transcription.C2   |
| 10 | wnt.C1             |
| 10 | wnt.C5             |
| 11 | adhesion.C4        |
| 11 | adhesion.C6        |
| 11 | ApopOccur.C6       |
| 11 | cellcycle.C2       |
| 11 | creb.C4            |
| 11 | cytoskeletal.C3    |
| 11 | differentiation.C4 |
| 11 | fli1.C3            |
| 11 | heatshock.C4       |
| 11 | heatshock.C6       |
| 11 | histone.C3         |
| 11 | hypoxia.C5         |
| 11 | IAP.C3             |
| 11 | mek.C2             |
| 11 | pkc.C4             |
| 11 | smad.C2            |
| 11 | tcell.C2           |
| 11 | tp53.C5            |
| 11 | ubiquitin.C4       |

**Table S5. Functional pattern memberships for cell lines.**

| cell_line                | mycoplasma | disease                          | adhesion | ApoptOcur | ApoptReg | autophagy | BH3 | cellcycle | creb | cytoskeletal | differentiatio | flil | heatshock | hippo | histone | hypoxia | IAP | mapk | mek | metabolic | mtor | pi3kakt | pke | s6rp | smad | src | stat | STP | tecl | tp53 | transcription | ubiquitin | wnt |
|--------------------------|------------|----------------------------------|----------|-----------|----------|-----------|-----|-----------|------|--------------|----------------|------|-----------|-------|---------|---------|-----|------|-----|-----------|------|---------|-----|------|------|-----|------|-----|------|------|---------------|-----------|-----|
| Blin-1                   | neg        | BCP-ALL                          | 7        | 7         | 5        | 6         | 6   | 7         | 5    | 2            | 6              | 4    | 9         | 2     | 6       | 3       | 2   | 6    | 6   | 8         | 7    | 5       | 4   | 7    | 6    | 3   | 6    | 4   | 7    | 6    | 3             | 5         | 6   |
| BV173                    | pos        | B cell precursor leukemia        | 7        | 8         | 5        | 6         | 3   | 7         | 5    | 6            | 2              | 1    | 9         | 1     | 1       | 3       | 1   | 6    | 6   | 8         | 7    | 5       | 6   | 7    | 2    | 3   | 6    | 4   | 7    | 6    | 5             | 1         | 6   |
| BV173                    | neg        | B cell precursor leukemia        | 7        | 8         | 5        | 6         | 6   | 7         | 5    | 4            | 5              | 4    | 9         | 1     | 6       | 3       | 2   | 6    | 6   | 8         | 7    | 5       | 5   | 7    | 1    | 3   | 6    | 4   | 6    | 6    | 5             | 5         | 6   |
| BV173 treated            | neg        | B cell precursor leukemia        | 7        | 8         | 5        | 6         | 2   | 7         | 5    | 6            | 5              | 4    | 9         | 4     | 1       | 6       | 2   | 6    | 6   | 8         | 7    | 5       | 4   | 7    | 2    | 2   | 6    | 4   | 7    | 6    | 1             | 1         | 6   |
| CCRF-CEM                 | neg        | leukemia, T lymphoblast          | 7        | 4         | 5        | 6         | 2   | 7         | 5    | 4            | 6              | 4    | 3         | 2     | 6       | 6       | 7   | 6    | 6   | 8         | 7    | 1       | 3   | 7    | 6    | 3   | 6    | 4   | 7    | 6    | 5             | 5         | 6   |
| Daudi                    | pos        | b lymphoblast,Burkitt's lymphoma | 7        | 8         | 5        | 6         | 6   | 7         | 1    | 6            | 6              | 3    | 9         | 1     | 6       | 3       | 2   | 6    | 6   | 8         | 7    | 5       | 6   | 7    | 6    | 3   | 6    | 4   | 1    | 6    | 5             | 5         | 6   |
| Daudi                    | neg        | b lymphoblast,Burkitt's lymphoma | 7        | 8         | 5        | 6         | 6   | 7         | 5    | 6            | 5              | 4    | 9         | 1     | 6       | 6       | 2   | 6    | 6   | 8         | 7    | 5       | 6   | 7    | 6    | 3   | 6    | 4   | 6    | 6    | 5             | 5         | 2   |
| RPMI8226                 |            |                                  | 7        | 8         | 5        | 6         | 6   | 7         | 5    | 1            | 6              | 3    | 9         | 1     | 6       | 6       | 7   | 6    | 6   | 8         | 7    | 5       | 6   | 7    | 6    | 3   | 6    | 4   | 1    | 6    | 5             | 5         | 4   |
| GM00131                  | 2nd-neg    | lymphoblastoid cell line         | 7        | 8         | 5        | 5         | 1   | 7         | 1    | 6            | 4              | 4    | 3         | 2     | 6       | 6       | 2   | 6    | 6   | 8         | 7    | 5       | 6   | 7    | 6    | 3   | 6    | 4   | 7    | 6    | 5             | 1         | 2   |
| GM00131 treated          | neg        | lymphoblastoid cell line         | 7        | 8         | 5        | 5         | 6   | 7         | 5    | 4            | 4              | 4    | 9         | 4     | 1       | 6       | 2   | 6    | 6   | 8         | 2    | 5       | 6   | 7    | 6    | 3   | 6    | 4   | 7    | 6    | 5             | 3         | 1   |
| HL-60                    | pos        | leukemia, AML M2                 | 7        | 1         | 5        | 6         | 6   | 7         | 5    | 6            | 6              | 4    | 9         | 1     | 6       | 3       | 2   | 2    | 6   | 8         | 7    | 5       | 1   | 7    | 6    | 3   | 6    | 4   | 1    | 6    | 5             | 5         | 5   |
| HL-60                    | neg        | leukemia, AML M2                 | 7        | 8         | 5        | 5         | 6   | 7         | 5    | 6            | 6              | 4    | 9         | 1     | 6       | 6       | 2   | 6    | 6   | 8         | 7    | 5       | 2   | 7    | 6    | 3   | 6    | 4   | 1    | 6    | 5             | 5         | 5   |
| HL60                     | neg        | leukemia, AML M2                 | 7        | 8         | 5        | 5         | 6   | 7         | 2    | 4            | 6              | 1    | 9         | 1     | 6       | 3       | 7   | 2    | 6   | 8         | 7    | 5       | 6   | 7    | 6    | 1   | 6    | 4   | 1    | 6    | 5             | 3         | 5   |
| HL-60 treated            | neg        | leukemia, AML M2                 | 7        | 7         | 5        | 6         | 6   | 5         | 5    | 6            | 6              | 4    | 9         | 1     | 6       | 2       | 7   | 2    | 6   | 8         | 7    | 5       | 6   | 7    | 6    | 3   | 6    | 4   | 7    | 6    | 5             | 5         | 1   |
| HL-60 TRE TGM2           | neg        | leukemia, AML M2                 | 7        | 8         | 5        | 5         | 6   | 7         | 5    | 6            | 6              | 1    | 9         | 1     | 6       | 6       | 1   | 1    | 6   | 8         | 7    | 5       | 4   | 7    | 6    | 3   | 6    | 4   | 1    | 6    | 5             | 5         | 6   |
| HL-60 TRE TGM2 control   | neg        | leukemia, AML M2                 | 7        | 8         | 5        | 5         | 6   | 7         | 5    | 6            | 6              | 1    | 2         | 1     | 6       | 6       | 7   | 1    | 6   | 8         | 7    | 5       | 4   | 7    | 6    | 3   | 6    | 4   | 7    | 6    | 5             | 5         | 6   |
| Jeko-1                   | neg        | lymphoma                         | 7        | 8         | 5        | 6         | 2   | 7         | 5    | 1            | 5              | 4    | 9         | 1     | 6       | 6       | 7   | 6    | 6   | 8         | 7    | 5       | 6   | 7    | 6    | 3   | 6    | 4   | 7    | 6    | 5             | 5         | 5   |
| Jurkat                   | 2nd-neg    | leukemia T-ALL                   | 7        | 8         | 5        | 6         | 6   | 7         | 5    | 6            | 6              | 2    | 9         | 2     | 6       | 6       | 2   | 6    | 6   | 8         | 7    | 5       | 6   | 7    | 6    | 3   | 6    | 4   | 7    | 6    | 5             | 5         | 6   |
| Jurkat treated           | neg        | leukemia T-ALL                   | 7        | 8         | 5        | 6         | 6   | 7         | 1    | 4            | 6              | 4    | 3         | 1     | 6       | 6       | 7   | 6    | 6   | 8         | 7    | 5       | 6   | 7    | 6    | 3   | 6    | 4   | 7    | 6    | 5             | 5         | 6   |
| Jurkat I9.2 Caspase8 mut | neg        | leukemia T-ALL                   | 7        | 8         | 5        | 6         | 6   | 7         | 5    | 4            | 6              | 4    | 3         | 4     | 6       | 6       | 2   | 6    | 6   | 8         | 7    | 5       | 6   | 7    | 2    | 3   | 6    | 4   | 7    | 6    | 5             | 1         | 6   |
| K562                     | pos        | leukemia, CML                    | 7        | 8         | 5        | 6         | 6   | 7         | 5    | 1            | 6              | 4    | 9         | 2     | 6       | 6       | 2   | 6    | 6   | 8         | 7    | 5       | 6   | 7    | 6    | 3   | 6    | 4   | 1    | 6    | 5             | 5         | 6   |
| K562                     | neg        | leukemia, CML                    | 7        | 8         | 5        | 6         | 6   | 7         | 2    | 2            | 6              | 4    | 9         | 1     | 6       | 6       | 7   | 6    | 6   | 8         | 7    | 5       | 6   | 7    | 6    | 3   | 6    | 4   | 1    | 1    | 5             | 5         | 6   |

|                           |         |                      |   |   |   |   |   |   |   |   |   |   |   |   |   |   |   |   |   |   |   |   |   |   |   |   |   |   |   |   |   |   |   |
|---------------------------|---------|----------------------|---|---|---|---|---|---|---|---|---|---|---|---|---|---|---|---|---|---|---|---|---|---|---|---|---|---|---|---|---|---|---|
| K562 treated              | neg     | leukemia, CML        | 7 | 8 | 5 | 6 | 6 | 7 | 5 | 2 | 6 | 4 | 9 | 4 | 6 | 6 | 7 | 6 | 6 | 8 | 7 | 5 | 6 | 7 | 6 | 3 | 6 | 4 | 1 | 6 | 5 | 5 | 6 |
| kasumi-1                  | pos     | leukemia, AML M2     | 7 | 8 | 5 | 1 | 6 | 7 | 5 | 6 | 6 | 4 | 9 | 2 | 6 | 3 | 2 | 1 | 6 | 8 | 7 | 1 | 6 | 7 | 2 | 3 | 6 | 4 | 1 | 6 | 3 | 5 | 5 |
| kasumi-1                  | neg     | leukemia, AML M2     | 7 | 8 | 5 | 5 | 6 | 7 | 5 | 6 | 3 | 4 | 9 | 1 | 6 | 6 | 2 | 1 | 6 | 8 | 7 | 5 | 6 | 7 | 1 | 3 | 4 | 4 | 1 | 6 | 5 | 5 | 6 |
| kasumi-1 treated          |         | leukemia, AML M2     | 7 | 8 | 5 | 2 | 6 | 7 | 5 | 4 | 6 | 4 | 9 | 1 | 6 | 6 | 7 | 6 | 6 | 8 | 7 | 4 | 6 | 7 | 2 | 3 | 6 | 4 | 1 | 6 | 3 | 5 | 2 |
| KBM3                      | neg     | leukemia, AML M5     | 7 | 8 | 5 | 2 | 6 | 7 | 5 | 4 | 6 | 2 | 3 | 2 | 6 | 6 | 7 | 2 | 6 | 8 | 7 | 5 | 1 | 7 | 6 | 3 | 6 | 4 | 7 | 6 | 5 | 5 | 5 |
| KBM5                      | pos     | leukemia, CML        | 7 | 8 | 5 | 6 | 6 | 7 | 5 | 6 | 6 | 1 | 9 | 1 | 6 | 2 | 1 | 6 | 6 | 8 | 7 | 5 | 4 | 4 | 2 | 3 | 6 | 4 | 7 | 6 | 5 | 5 | 5 |
| KBM5                      | neg     | leukemia, CML        | 7 | 8 | 5 | 6 | 6 | 7 | 5 | 6 | 6 | 1 | 9 | 4 | 6 | 2 | 2 | 1 | 6 | 8 | 7 | 5 | 6 | 4 | 2 | 3 | 6 | 4 | 7 | 6 | 5 | 5 | 6 |
| KBM5 treated              | neg     | leukemia, CML        | 7 | 8 | 5 | 6 | 6 | 7 | 5 | 6 | 6 | 1 | 9 | 1 | 6 | 2 | 2 | 1 | 6 | 8 | 7 | 4 | 6 | 7 | 2 | 3 | 6 | 4 | 7 | 6 | 5 | 5 | 6 |
| KBM5 STL, w/o STI         | pos     | CML T315I            | 7 | 2 | 5 | 6 | 6 | 7 | 5 | 6 | 6 | 3 | 9 | 1 | 1 | 2 | 1 | 5 | 6 | 8 | 7 | 1 | 6 | 7 | 6 | 3 | 6 | 4 | 7 | 6 | 5 | 5 | 6 |
| KBM5 STL, w/STI           | neg     | CML T315I            | 7 | 7 | 5 | 2 | 6 | 7 | 1 | 6 | 6 | 3 | 9 | 1 | 1 | 3 | 7 | 5 | 6 | 8 | 7 | 1 | 6 | 7 | 6 | 3 | 6 | 4 | 7 | 6 | 5 | 3 | 6 |
| KBM5 STL, w/o STI         | neg     | CML T315I            | 7 | 8 | 5 | 5 | 6 | 7 | 5 | 1 | 6 | 1 | 9 | 1 | 6 | 3 | 2 | 6 | 6 | 8 | 7 | 1 | 6 | 7 | 2 | 3 | 6 | 4 | 1 | 6 | 5 | 3 | 3 |
| KBM5 STL treated, w/o STI | neg     | CML T315I            | 7 | 8 | 5 | 5 | 6 | 7 | 5 | 6 | 6 | 3 | 9 | 1 | 6 | 3 | 7 | 2 | 6 | 8 | 7 | 4 | 6 | 7 | 6 | 3 | 6 | 4 | 2 | 6 | 5 | 3 | 6 |
| KG-1                      | pos     | leukemia, AML M3     | 7 | 1 | 5 | 6 | 6 | 7 | 5 | 6 | 6 | 4 | 9 | 2 | 6 | 6 | 2 | 2 | 6 | 8 | 7 | 1 | 6 | 4 | 6 | 3 | 6 | 4 | 7 | 6 | 5 | 5 | 5 |
| KG1                       | neg     | leukemia, AML M3     | 7 | 8 | 5 | 6 | 1 | 7 | 5 | 4 | 2 | 4 | 9 | 1 | 6 | 3 | 2 | 6 | 6 | 6 | 7 | 5 | 3 | 7 | 6 | 3 | 6 | 4 | 7 | 6 | 1 | 3 | 6 |
| KG-1 treated              | neg     | leukemia, AML M3     | 7 | 8 | 5 | 5 | 2 | 7 | 2 | 4 | 6 | 4 | 9 | 4 | 6 | 6 | 2 | 2 | 6 | 8 | 7 | 5 | 6 | 4 | 6 | 1 | 2 | 4 | 7 | 6 | 5 | 5 | 5 |
| KG-1 $\alpha$             | neg     | leukemia, AML M3     | 7 | 8 | 2 | 6 | 6 | 7 | 5 | 4 | 6 | 2 | 9 | 2 | 6 | 6 | 2 | 1 | 6 | 8 | 7 | 5 | 6 | 7 | 6 | 3 | 6 | 4 | 7 | 6 | 5 | 5 | 6 |
| KOPTI-K1 (labe:KOP TI)    | neg     | T-ALL                | 7 | 2 | 5 | 6 | 6 | 7 | 3 | 6 | 6 | 4 | 9 | 2 | 6 | 6 | 1 | 6 | 6 | 2 | 7 | 1 | 6 | 7 | 6 | 3 | 6 | 4 | 7 | 6 | 5 | 5 | 6 |
| MDSL                      | neg     | MDS                  | 7 | 8 | 5 | 6 | 6 | 7 | 5 | 6 | 6 | 1 | 3 | 1 | 6 | 6 | 2 | 6 | 6 | 8 | 7 | 5 | 6 | 7 | 2 | 3 | 2 | 4 | 7 | 6 | 5 | 2 | 6 |
| MINO                      | neg     | Mantle Cell Lymphoma | 7 | 8 | 5 | 6 | 6 | 7 | 5 | 6 | 6 | 1 | 9 | 1 | 6 | 3 | 2 | 6 | 6 | 8 | 7 | 5 | 6 | 7 | 6 | 3 | 6 | 4 | 7 | 6 | 5 | 2 | 6 |
| ML-1                      | pos     | leukemia, AML M3     | 7 | 8 | 5 | 5 | 6 | 7 | 5 | 4 | 6 | 1 | 9 | 2 | 6 | 3 | 7 | 1 | 6 | 8 | 7 | 5 | 6 | 7 | 6 | 3 | 6 | 4 | 7 | 6 | 5 | 5 | 5 |
| ML-1                      | neg     | leukemia, AML M3     | 7 | 7 | 5 | 5 | 6 | 7 | 5 | 4 | 6 | 1 | 9 | 1 | 6 | 6 | 7 | 6 | 6 | 8 | 7 | 5 | 6 | 7 | 6 | 3 | 2 | 4 | 1 | 6 | 5 | 5 | 6 |
| ML-1 treated              | neg     | leukemia, AML M3     | 7 | 8 | 5 | 6 | 6 | 7 | 2 | 6 | 6 | 4 | 9 | 1 | 6 | 6 | 7 | 6 | 6 | 8 | 7 | 5 | 6 | 7 | 6 | 3 | 6 | 4 | 1 | 6 | 5 | 5 | 6 |
| ML-2 (AML-ML2)            | neg     | leukemia, AML M4     | 7 | 1 | 5 | 6 | 6 | 7 | 5 | 4 | 6 | 4 | 9 | 2 | 6 | 6 | 7 | 6 | 6 | 8 | 7 | 5 | 1 | 7 | 6 | 3 | 6 | 4 | 6 | 6 | 5 | 5 | 6 |
| Mo7e                      | 2nd-neg | leukemia, AML M7     | 7 | 8 | 5 | 6 | 6 | 7 | 5 | 2 | 6 | 3 | 9 | 4 | 6 | 6 | 7 | 6 | 1 | 8 | 7 | 5 | 6 | 7 | 6 | 3 | 6 | 4 | 7 | 6 | 5 | 5 | 1 |
| Molm13                    | neg     | leukemia, AML M5a    | 7 | 8 | 5 | 2 | 6 | 7 | 5 | 6 | 6 | 4 | 9 | 4 | 6 | 3 | 2 | 6 | 6 | 8 | 7 | 5 | 6 | 7 | 6 | 3 | 6 | 4 | 7 | 6 | 5 | 1 | 6 |
| Molm13 P53 K/D            | neg     | leukemia, AML M5a    | 7 | 8 | 5 | 5 | 6 | 7 | 1 | 1 | 6 | 3 | 9 | 1 | 1 | 3 | 2 | 2 | 6 | 8 | 7 | 1 | 6 | 7 | 6 | 3 | 6 | 4 | 7 | 6 | 5 | 1 | 6 |
| Molm13 P53 vector         | neg     | leukemia, AML M5a    | 7 | 8 | 5 | 5 | 6 | 7 | 5 | 1 | 6 | 3 | 9 | 1 | 6 | 3 | 2 | 2 | 6 | 8 | 7 | 1 | 6 | 7 | 6 | 1 | 6 | 4 | 7 | 6 | 5 | 1 | 5 |

|                             |         |                      |   |   |   |   |   |   |   |   |   |   |   |   |   |   |   |   |   |   |   |   |   |   |   |   |   |   |   |   |   |   |   |
|-----------------------------|---------|----------------------|---|---|---|---|---|---|---|---|---|---|---|---|---|---|---|---|---|---|---|---|---|---|---|---|---|---|---|---|---|---|---|
| Molm14                      | 2nd-neg | leukemia, AML M5a    | 7 | 7 | 5 | 6 | 6 | 7 | 5 | 4 | 6 | 1 | 9 | 2 | 6 | 3 | 1 | 6 | 6 | 8 | 7 | 1 | 4 | 7 | 6 | 3 | 6 | 4 | 7 | 6 | 5 | 1 | 3 |
| molm14                      | neg     | leukemia, AML M5a    | 7 | 7 | 5 | 5 | 6 | 7 | 5 | 4 | 6 | 3 | 9 | 2 | 1 | 6 | 2 | 2 | 6 | 8 | 7 | 1 | 6 | 7 | 6 | 3 | 6 | 4 | 2 | 6 | 5 | 1 | 6 |
| molm14 treated              | neg     | leukemia, AML M5a    | 7 | 8 | 5 | 6 | 6 | 7 | 5 | 4 | 6 | 3 | 9 | 4 | 6 | 3 | 7 | 6 | 6 | 8 | 7 | 1 | 6 | 7 | 6 | 3 | 6 | 4 | 7 | 6 | 5 | 5 | 3 |
| molm16                      |         |                      | 7 | 8 | 5 | 1 | 6 | 7 | 5 | 4 | 6 | 1 | 9 | 4 | 1 | 6 | 7 | 6 | 6 | 8 | 7 | 4 | 6 | 7 | 6 | 3 | 6 | 4 | 1 | 6 | 5 | 1 | 1 |
| molt3                       | neg     | T lymphoblast, T-ALL | 7 | 8 | 5 | 6 | 6 | 7 | 5 | 1 | 6 | 4 | 9 | 2 | 6 | 6 | 2 | 1 | 6 | 2 | 7 | 1 | 6 | 7 | 6 | 3 | 2 | 4 | 7 | 6 | 5 | 5 | 6 |
| Molt4                       | neg     | T lymphoblast, T-ALL | 7 | 8 | 5 | 6 | 6 | 7 | 5 | 1 | 6 | 4 | 9 | 1 | 6 | 6 | 2 | 6 | 6 | 8 | 7 | 5 | 6 | 7 | 2 | 3 | 6 | 4 | 7 | 6 | 5 | 5 | 6 |
| MR2                         | pos     | APL                  | 7 | 8 | 5 | 6 | 6 | 7 | 5 | 4 | 6 | 4 | 9 | 1 | 6 | 6 | 2 | 6 | 6 | 8 | 7 | 1 | 6 | 7 | 6 | 3 | 2 | 4 | 1 | 6 | 5 | 5 | 5 |
| MR2 treated                 | neg     | APL                  | 7 | 8 | 5 | 6 | 6 | 7 | 5 | 4 | 6 | 4 | 9 | 1 | 6 | 6 | 7 | 1 | 6 | 8 | 7 | 5 | 6 | 7 | 6 | 2 | 2 | 4 | 1 | 6 | 5 | 5 | 6 |
| MV4-11                      | pos     | leukemia, AML M5     | 7 | 8 | 5 | 6 | 6 | 7 | 2 | 6 | 6 | 4 | 9 | 2 | 6 | 6 | 2 | 6 | 6 | 8 | 7 | 5 | 4 | 7 | 6 | 3 | 6 | 4 | 6 | 6 | 5 | 1 | 6 |
| MV4-11                      | neg     | leukemia, AML M5     | 7 | 8 | 5 | 2 | 6 | 7 | 2 | 6 | 6 | 4 | 3 | 2 | 6 | 6 | 2 | 6 | 6 | 8 | 7 | 5 | 4 | 7 | 6 | 3 | 6 | 4 | 7 | 6 | 5 | 3 | 6 |
| MV4-11 treated              |         | leukemia, AML M5     | 7 | 8 | 5 | 1 | 6 | 7 | 5 | 4 | 6 | 4 | 3 | 2 | 6 | 3 | 7 | 6 | 6 | 8 | 7 | 5 | 6 | 7 | 6 | 3 | 6 | 4 | 1 | 6 | 5 | 3 | 5 |
| MV4-11 IDH1 R132H           | neg     | leukemia, AML M5     | 7 | 8 | 5 | 6 | 6 | 7 | 2 | 4 | 6 | 4 | 9 | 1 | 1 | 3 | 2 | 6 | 6 | 8 | 7 | 5 | 6 | 7 | 6 | 3 | 6 | 4 | 7 | 6 | 5 | 2 | 6 |
| MV4-11 IDH1 wt(vector)      | neg     | leukemia, AML M5     | 7 | 8 | 5 | 2 | 6 | 7 | 2 | 4 | 6 | 4 | 3 | 1 | 6 | 6 | 2 | 6 | 6 | 8 | 7 | 5 | 6 | 7 | 6 | 3 | 2 | 4 | 7 | 6 | 5 | 5 | 6 |
| Nalm6                       | pos     | B-ALL                | 7 | 1 | 5 | 6 | 6 | 7 | 5 | 6 | 6 | 4 | 9 | 1 | 6 | 6 | 2 | 1 | 6 | 8 | 7 | 4 | 6 | 7 | 6 | 3 | 6 | 4 | 7 | 6 | 3 | 1 | 6 |
| Nalm6 treated               | neg     | B-ALL                | 7 | 8 | 5 | 6 | 6 | 7 | 5 | 4 | 6 | 1 | 9 | 4 | 6 | 6 | 7 | 1 | 6 | 8 | 7 | 5 | 4 | 7 | 6 | 3 | 6 | 4 | 7 | 6 | 5 | 5 | 6 |
| NB4                         | neg     | leukemia, AML M3     | 7 | 8 | 5 | 1 | 1 | 7 | 5 | 4 | 6 | 1 | 9 | 1 | 6 | 6 | 1 | 1 | 6 | 8 | 7 | 1 | 6 | 7 | 6 | 3 | 2 | 4 | 1 | 6 | 5 | 3 | 5 |
| OCIAML2                     | neg     | leukemia, AML M4     | 7 | 8 | 5 | 6 | 6 | 7 | 1 | 4 | 6 | 1 | 9 | 4 | 6 | 6 | 1 | 6 | 6 | 8 | 7 | 5 | 6 | 7 | 6 | 3 | 6 | 4 | 1 | 6 | 5 | 5 | 6 |
| OCIAML3                     | neg     | leukemia, AML M4     | 7 | 8 | 5 | 6 | 6 | 7 | 5 | 6 | 6 | 3 | 9 | 1 | 1 | 3 | 2 | 6 | 6 | 8 | 7 | 4 | 6 | 7 | 6 | 3 | 6 | 4 | 7 | 6 | 5 | 1 | 2 |
| OCIAML3 550 TGM2-overexp    | neg     | leukemia, AML M4     | 7 | 8 | 5 | 6 | 6 | 7 | 5 | 4 | 6 | 3 | 9 | 1 | 6 | 6 | 1 | 6 | 6 | 8 | 7 | 5 | 6 | 7 | 6 | 3 | 6 | 4 | 7 | 6 | 5 | 1 | 2 |
| OCIAML3 708 ppp2R2A shRNA   | neg     | leukemia, AML M5     | 7 | 7 | 5 | 6 | 6 | 7 | 5 | 6 | 6 | 4 | 9 | 1 | 6 | 3 | 3 | 6 | 6 | 8 | 7 | 5 | 6 | 7 | 6 | 3 | 6 | 4 | 7 | 6 | 5 | 5 | 6 |
| OCIAML3 709 ppp2R2A shRNA   | neg     | leukemia, AML M4     | 7 | 7 | 5 | 6 | 6 | 7 | 1 | 6 | 6 | 4 | 9 | 1 | 6 | 6 | 2 | 2 | 6 | 8 | 7 | 5 | 6 | 7 | 6 | 3 | 6 | 4 | 7 | 6 | 5 | 5 | 5 |
| OCIAML3 Bcl2 overexpression | neg     | leukemia, AML M4     | 7 | 8 | 5 | 6 | 6 | 7 | 1 | 4 | 6 | 4 | 9 | 4 | 6 | 6 | 1 | 1 | 6 | 8 | 7 | 5 | 6 | 7 | 6 | 3 | 6 | 4 | 7 | 6 | 5 | 5 | 3 |
| OCIAML3 Bcl2 vector         | neg     | leukemia, AML M4     | 7 | 7 | 5 | 6 | 6 | 7 | 1 | 6 | 6 | 4 | 9 | 4 | 6 | 6 | 7 | 6 | 6 | 8 | 7 | 5 | 6 | 7 | 6 | 1 | 6 | 4 | 7 | 6 | 5 | 5 | 3 |
| OCIAML3 IDH1 R132H          | neg     | leukemia, AML M4     | 7 | 8 | 5 | 5 | 6 | 7 | 5 | 6 | 6 | 4 | 9 | 1 | 1 | 3 | 2 | 2 | 6 | 8 | 7 | 5 | 6 | 7 | 6 | 3 | 6 | 4 | 7 | 6 | 5 | 5 | 2 |

|                                 |     |                                  |   |   |   |   |   |   |   |   |   |   |   |   |   |   |   |   |   |   |   |   |   |   |   |   |   |   |   |   |   |   |   |
|---------------------------------|-----|----------------------------------|---|---|---|---|---|---|---|---|---|---|---|---|---|---|---|---|---|---|---|---|---|---|---|---|---|---|---|---|---|---|---|
| OCIAML3 IDH1 wt(vector)         | neg | leukemia, AML M4                 | 7 | 8 | 5 | 6 | 6 | 7 | 5 | 4 | 6 | 4 | 9 | 1 | 6 | 6 | 2 | 6 | 6 | 8 | 7 | 5 | 6 | 7 | 6 | 3 | 6 | 4 | 7 | 6 | 5 | 3 | 2 |
| OCIAML3 inducible HIF1a ODD mut | neg | leukemia, AML M4                 | 7 | 8 | 5 | 2 | 6 | 7 | 5 | 6 | 6 | 3 | 9 | 1 | 1 | 6 | 7 | 6 | 6 | 8 | 7 | 5 | 6 | 7 | 6 | 3 | 6 | 4 | 7 | 6 | 5 | 5 | 2 |
| OCIAML3 ITD                     | pos | leukemia, AML M4                 | 7 | 8 | 5 | 6 | 6 | 7 | 1 | 4 | 6 | 4 | 9 | 4 | 6 | 6 | 2 | 2 | 6 | 8 | 7 | 5 | 6 | 7 | 6 | 3 | 6 | 4 | 7 | 6 | 5 | 3 | 3 |
| OCIAML3 ITD treated             | neg | leukemia, AML M4                 | 7 | 8 | 5 | 6 | 6 | 7 | 1 | 6 | 6 | 4 | 9 | 4 | 6 | 6 | 2 | 2 | 6 | 8 | 7 | 5 | 6 | 7 | 6 | 3 | 6 | 4 | 7 | 6 | 5 | 5 | 6 |
| OCIAML3 ITD vec                 | neg | leukemia, AML M4                 | 7 | 8 | 5 | 6 | 6 | 7 | 5 | 6 | 6 | 4 | 3 | 4 | 6 | 6 | 1 | 2 | 6 | 8 | 7 | 5 | 6 | 7 | 6 | 3 | 6 | 4 | 7 | 6 | 5 | 5 | 3 |
| OCIAML3 NS for ppp2R2A shRNA    | neg | leukemia, AML M4                 | 7 | 8 | 5 | 6 | 6 | 7 | 5 | 6 | 6 | 4 | 9 | 1 | 6 | 6 | 2 | 2 | 6 | 8 | 7 | 5 | 6 | 7 | 6 | 3 | 6 | 4 | 7 | 6 | 5 | 5 | 2 |
| OCIAML3 p100SSAA                | neg | leukemia, AML M4                 | 7 | 8 | 5 | 6 | 6 | 7 | 5 | 4 | 6 | 4 | 9 | 1 | 6 | 6 | 2 | 2 | 6 | 8 | 7 | 5 | 6 | 7 | 6 | 3 | 6 | 4 | 7 | 6 | 5 | 1 | 5 |
| OCIAML3 P53 shRNA               | neg | leukemia, AML M4                 | 7 | 8 | 5 | 6 | 6 | 7 | 5 | 6 | 6 | 4 | 9 | 1 | 6 | 6 | 2 | 5 | 6 | 8 | 7 | 5 | 6 | 7 | 6 | 3 | 6 | 4 | 7 | 6 | 5 | 1 | 6 |
| OCIAML3 P53 vector              | neg | leukemia, AML M4                 | 7 | 8 | 5 | 6 | 6 | 7 | 5 | 6 | 6 | 4 | 9 | 1 | 6 | 6 | 2 | 6 | 6 | 8 | 7 | 5 | 6 | 7 | 6 | 3 | 6 | 4 | 7 | 6 | 5 | 5 | 6 |
| OCIAML3 PI3K active pool #1     | neg | leukemia, AML M4                 | 7 | 7 | 5 | 6 | 6 | 7 | 5 | 4 | 6 | 1 | 9 | 1 | 6 | 6 | 2 | 6 | 6 | 8 | 7 | 5 | 6 | 7 | 6 | 3 | 6 | 4 | 7 | 6 | 5 | 3 | 6 |
| OCIAML3 PI3K wt pool#2 1A       | neg | leukemia, AML M4                 | 7 | 8 | 5 | 6 | 6 | 7 | 5 | 4 | 6 | 4 | 9 | 1 | 6 | 6 | 1 | 6 | 6 | 8 | 7 | 5 | 6 | 7 | 6 | 3 | 6 | 4 | 7 | 6 | 5 | 3 | 2 |
| OCIAML3 Stat5A                  | neg | leukemia, AML M4                 | 7 | 8 | 5 | 6 | 6 | 7 | 5 | 4 | 6 | 3 | 3 | 4 | 6 | 3 | 2 | 6 | 6 | 8 | 7 | 5 | 6 | 7 | 6 | 3 | 6 | 4 | 7 | 6 | 5 | 3 | 2 |
| OCIAML3 stat5A N642H            | neg | leukemia, AML M4                 | 7 | 7 | 5 | 6 | 6 | 7 | 5 | 6 | 6 | 3 | 9 | 1 | 1 | 6 | 7 | 2 | 6 | 8 | 7 | 5 | 6 | 7 | 6 | 3 | 6 | 4 | 7 | 6 | 5 | 5 | 6 |
| OCIAML3 stat5A N642H H4F        | neg | leukemia, AML M4                 | 7 | 7 | 5 | 6 | 6 | 7 | 5 | 6 | 6 | 3 | 9 | 1 | 6 | 3 | 7 | 6 | 6 | 8 | 7 | 5 | 6 | 7 | 6 | 3 | 6 | 4 | 7 | 6 | 5 | 5 | 3 |
| OCIAML3 stat5A wt               | neg | leukemia, AML M4                 | 7 | 8 | 5 | 6 | 6 | 7 | 5 | 6 | 6 | 3 | 9 | 1 | 6 | 3 | 7 | 2 | 6 | 8 | 7 | 5 | 6 | 7 | 6 | 3 | 6 | 4 | 7 | 6 | 5 | 3 | 2 |
| OCIAML3 TRE TGM2                | neg | leukemia, AML M4                 | 7 | 8 | 5 | 6 | 6 | 7 | 5 | 4 | 6 | 1 | 9 | 1 | 1 | 6 | 2 | 2 | 6 | 8 | 7 | 5 | 6 | 7 | 6 | 3 | 6 | 4 | 6 | 6 | 5 | 5 | 5 |
| OCIAML3 TRE TGM2 control        | neg | leukemia, AML M4                 | 7 | 1 | 5 | 2 | 6 | 7 | 5 | 6 | 6 | 1 | 9 | 1 | 6 | 3 | 7 | 6 | 6 | 8 | 7 | 5 | 6 | 7 | 6 | 3 | 6 | 4 | 6 | 6 | 5 | 3 | 5 |
| OCIAML5                         | neg | leukemia, AML M4                 | 7 | 8 | 5 | 6 | 6 | 7 | 5 | 4 | 6 | 1 | 9 | 4 | 6 | 6 | 7 | 6 | 6 | 8 | 7 | 5 | 6 | 7 | 2 | 3 | 2 | 4 | 7 | 6 | 5 | 3 | 6 |
| P12 ichikawa                    | neg | T-ALL                            | 7 | 8 | 5 | 5 | 6 | 7 | 1 | 6 | 6 | 4 | 3 | 2 | 1 | 6 | 7 | 6 | 6 | 8 | 7 | 4 | 6 | 7 | 6 | 1 | 6 | 4 | 7 | 6 | 5 | 5 | 6 |
| Raji                            | pos | B lymphocyte, Burkitt's lymphoma | 7 | 8 | 5 | 6 | 6 | 7 | 5 | 6 | 3 | 1 | 9 | 2 | 6 | 6 | 7 | 6 | 6 | 8 | 7 | 5 | 6 | 7 | 6 | 3 | 6 | 4 | 6 | 6 | 5 | 5 | 6 |
| Raji                            | neg | B lymphocyte, Burkitt's lymphoma | 7 | 8 | 5 | 6 | 6 | 7 | 5 | 1 | 6 | 4 | 9 | 2 | 6 | 6 | 7 | 6 | 6 | 8 | 7 | 5 | 4 | 7 | 6 | 3 | 6 | 4 | 6 | 6 | 5 | 1 | 6 |
| Raji treated                    | neg | B lymphocyte, Burkitt's          | 7 | 8 | 5 | 6 | 6 | 7 | 5 | 1 | 6 | 4 | 9 | 2 | 6 | 6 | 2 | 6 | 6 | 8 | 7 | 5 | 4 | 7 | 6 | 3 | 6 | 4 | 6 | 6 | 5 | 1 | 6 |





**Table S6. Demographic information of patients overall and in each signature (S1-S13).**

| Clinical Features |              | All   | S1     | S2     | S3     | S4     | S5    | S6    | S7    | S8    | S9     | S10    | S11   | S12   | S13   |
|-------------------|--------------|-------|--------|--------|--------|--------|-------|-------|-------|-------|--------|--------|-------|-------|-------|
| Sample Size       | Count        | 205   | 9      | 12     | 11     | 11     | 27    | 17    | 20    | 28    | 6      | 17     | 22    | 14    | 11    |
| Age.at.Dx         | Mean         | 59.05 | 62.79  | 65.98  | 56.29  | 56.20  | 58.81 | 54.51 | 58.57 | 57.77 | 48.68  | 60.75  | 59.14 | 55.00 | 73.81 |
|                   | SD           | 15.62 | 9.66   | 9.06   | 14.88  | 17.22  | 15.04 | 18.89 | 16.69 | 16.23 | 16.85  | 12.05  | 16.46 | 17.83 | 8.78  |
| Gender            | Female       | 50.7% | 44.4%  | 41.7%  | 54.5%  | 54.5%  | 40.7% | 52.9% | 40.0% | 60.7% | 66.7%  | 64.7%  | 45.5% | 42.9% | 63.6% |
|                   | Male         | 49.3% | 55.6%  | 58.3%  | 45.5%  | 45.5%  | 59.3% | 47.1% | 60.0% | 39.3% | 33.3%  | 35.3%  | 54.5% | 57.1% | 36.4% |
| FAB               | M0           | 5.9%  | 0.0%   | 0.0%   | 0.0%   | 0.0%   | 0.0%  | 0.0%  | 5.0%  | 7.1%  | 0.0%   | 17.6%  | 9.1%  | 14.3% | 18.2% |
|                   | M1           | 12.7% | 0.0%   | 0.0%   | 0.0%   | 0.0%   | 11.1% | 11.8% | 10.0% | 7.1%  | 50.0%  | 23.5%  | 9.1%  | 42.9% | 18.2% |
|                   | M2           | 33.2% | 0.0%   | 0.0%   | 36.4%  | 45.5%  | 48.1% | 47.1% | 45.0% | 39.3% | 33.3%  | 29.4%  | 9.1%  | 28.6% | 45.5% |
|                   | M4           | 28.3% | 44.4%  | 50.0%  | 18.2%  | 27.3%  | 18.5% | 41.2% | 25.0% | 39.3% | 0.0%   | 23.5%  | 36.4% | 14.3% | 9.1%  |
|                   | M5           | 12.2% | 55.6%  | 41.7%  | 0.0%   | 0.0%   | 3.7%  | 0.0%  | 10.0% | 7.1%  | 16.7%  | 0.0%   | 36.4% | 0.0%  | 9.1%  |
|                   | M6           | 2.0%  | 0.0%   | 0.0%   | 9.1%   | 9.1%   | 3.7%  | 0.0%  | 5.0%  | 0.0%  | 0.0%   | 0.0%   | 0.0%  | 0.0%  | 0.0%  |
|                   | M7           | 2.4%  | 0.0%   | 8.3%   | 9.1%   | 9.1%   | 3.7%  | 0.0%  | 0.0%  | 0.0%  | 0.0%   | 0.0%   | 5.9%  | 0.0%  | 0.0%  |
|                   | RAEBT        | 2.9%  | 0.0%   | 0.0%   | 27.3%  | 9.1%   | 7.4%  | 0.0%  | 0.0%  | 0.0%  | 0.0%   | 0.0%   | 0.0%  | 0.0%  | 0.0%  |
|                   | NA           | 0.5%  | 0.0%   | 0.0%   | 0.0%   | 0.0%   | 3.7%  | 0.0%  | 0.0%  | 0.0%  | 0.0%   | 0.0%   | 0.0%  | 0.0%  | 0.0%  |
| Cytogenetics      | Favorable    | 10.7% | 11.1%  | 0.0%   | 9.1%   | 18.2%  | 3.7%  | 23.5% | 20.0% | 17.9% | 0.0%   | 5.9%   | 4.5%  | 7.1%  | 9.1%  |
|                   | Intermediate | 46.3% | 33.3%  | 66.7%  | 27.3%  | 27.3%  | 44.4% | 52.9% | 40.0% | 50.0% | 83.3%  | 29.4%  | 50.0% | 71.4% | 36.4% |
|                   | Unfavorable  | 42.9% | 55.6%  | 33.3%  | 63.6%  | 54.5%  | 51.9% | 23.5% | 40.0% | 32.1% | 16.7%  | 64.7%  | 45.5% | 21.4% | 54.5% |
| AHD               | Yes          | 31.4% | 22.2%  | 33.3%  | 45.5%  | 36.4%  | 48.1% | 47.1% | 35.0% | 28.6% | 0.0%   | 29.4%  | 13.6% | 15.4% | 27.3% |
|                   | No           | 68.6% | 77.8%  | 66.7%  | 54.5%  | 63.6%  | 51.9% | 52.9% | 65.0% | 71.4% | 100.0% | 70.6%  | 86.4% | 84.6% | 72.7% |
| ITD               | N (tested)   | 196   | 9      | 11     | 10     | 9      | 26    | 16    | 18    | 28    | 6      | 16     | 22    | 14    | 11    |
|                   | Mutant       | 23.0% | 11.1%  | 9.1%   | 40.0%  | 11.1%  | 11.5% | 12.5% | 11.1% | 35.7% | 16.7%  | 37.5%  | 27.3% | 50.0% | 9.1%  |
|                   | Wildtype     | 77.0% | 88.9%  | 90.9%  | 60.0%  | 88.9%  | 88.5% | 87.5% | 88.9% | 64.3% | 83.3%  | 62.5%  | 72.7% | 50.0% | 90.9% |
| D835              | N (tested)   | 196   | 9      | 11     | 10     | 9      | 26    | 16    | 18    | 28    | 6      | 16     | 22    | 14    | 11    |
|                   | Mutant       | 9.7%  | 0.0%   | 0.0%   | 0.0%   | 0.0%   | 3.8%  | 12.5% | 5.6%  | 10.7% | 0.0%   | 0.0%   | 27.3% | 21.4% | 27.3% |
|                   | Wildtype     | 90.3% | 100.0% | 100.0% | 100.0% | 100.0% | 96.2% | 87.5% | 94.4% | 89.3% | 100.0% | 100.0% | 72.7% | 78.6% | 72.7% |
| FLT3              | N (tested)   | 196   | 9      | 11     | 10     | 9      | 26    | 16    | 18    | 28    | 6      | 16     | 22    | 14    | 11    |
|                   | Mutant       | 29.6% | 11.1%  | 9.1%   | 40.0%  | 11.1%  | 15.4% | 25.0% | 11.1% | 39.3% | 16.7%  | 37.5%  | 40.9% | 71.4% | 36.4% |
|                   | Wildtype     | 70.4% | 88.9%  | 90.9%  | 60.0%  | 88.9%  | 84.6% | 75.0% | 88.9% | 60.7% | 83.3%  | 62.5%  | 59.1% | 28.6% | 63.6% |
| NPM1              | N (tested)   | 165   | 9      | 7      | 7      | 7      | 21    | 15    | 17    | 23    | 4      | 17     | 19    | 12    | 7     |
|                   | Mutant       | 22.4% | 22.2%  | 28.6%  | 14.3%  | 14.3%  | 4.8%  | 6.7%  | 17.6% | 21.7% | 25.0%  | 23.5%  | 36.8% | 58.3% | 28.6% |
|                   | Wildtype     | 77.6% | 77.8%  | 71.4%  | 85.7%  | 85.7%  | 95.2% | 93.3% | 82.4% | 78.3% | 75.0%  | 76.5%  | 63.2% | 41.7% | 71.4% |

|        |            |       |        |        |       |        |       |        |        |       |        |       |        |        |        |
|--------|------------|-------|--------|--------|-------|--------|-------|--------|--------|-------|--------|-------|--------|--------|--------|
| RAS    | N (tested) | 178   | 8      | 11     | 7     | 9      | 25    | 15     | 19     | 25    | 5      | 13    | 19     | 11     | 11     |
|        | Mutant     | 21.9% | 37.5%  | 27.3%  | 14.3% | 33.3%  | 20.0% | 33.3%  | 31.6%  | 28.0% | 40.0%  | 7.7%  | 10.5%  | 0.0%   | 9.1%   |
|        | Wildtype   | 78.1% | 62.5%  | 72.7%  | 85.7% | 66.7%  | 80.0% | 66.7%  | 68.4%  | 72.0% | 60.0%  | 92.3% | 89.5%  | 100.0% | 90.9%  |
| IDH1   | N (tested) | 145   | 8      | 6      | 6     | 6      | 18    | 13     | 17     | 19    | 5      | 13    | 15     | 11     | 8      |
|        | Mutant     | 11.7% | 0.0%   | 33.3%  | 16.7% | 0.0%   | 11.1% | 23.1%  | 11.8%  | 5.3%  | 0.0%   | 7.7%  | 20.0%  | 18.2%  | 0.0%   |
|        | Wildtype   | 88.3% | 100.0% | 66.7%  | 83.3% | 100.0% | 88.9% | 76.9%  | 88.2%  | 94.7% | 100.0% | 92.3% | 80.0%  | 81.8%  | 100.0% |
| IDH2   | N (tested) | 145   | 8      | 6      | 6     | 6      | 18    | 13     | 17     | 19    | 5      | 13    | 15     | 11     | 8      |
|        | Mutant     | 11.0% | 12.5%  | 0.0%   | 16.7% | 0.0%   | 16.7% | 7.7%   | 11.8%  | 15.8% | 20.0%  | 7.7%  | 13.3%  | 9.1%   | 0.0%   |
|        | Wildtype   | 89.0% | 87.5%  | 100.0% | 83.3% | 100.0% | 83.3% | 92.3%  | 88.2%  | 84.2% | 80.0%  | 92.3% | 86.7%  | 90.9%  | 100.0% |
| IDH1.2 | N (tested) | 145   | 8      | 6      | 6     | 6      | 18    | 13     | 17     | 19    | 5      | 13    | 15     | 11     | 8      |
|        | Mutant     | 21.4% | 12.5%  | 33.3%  | 16.7% | 0.0%   | 27.8% | 30.8%  | 23.5%  | 21.1% | 20.0%  | 15.4% | 26.7%  | 27.3%  | 0.0%   |
|        | Wildtype   | 78.6% | 87.5%  | 66.7%  | 83.3% | 100.0% | 72.2% | 69.2%  | 76.5%  | 78.9% | 80.0%  | 84.6% | 73.3%  | 72.7%  | 100.0% |
| DNMT3A | N (tested) | 133   | 8      | 5      | 5     | 6      | 17    | 9      | 16     | 18    | 4      | 12    | 14     | 12     | 7      |
|        | Mutant     | 8.3%  | 0.0%   | 0.0%   | 20.0% | 0.0%   | 11.8% | 0.0%   | 0.0%   | 5.6%  | 0.0%   | 16.7% | 28.6%  | 8.3%   | 0.0%   |
|        | Wildtype   | 91.7% | 100.0% | 100.0% | 80.0% | 100.0% | 88.2% | 100.0% | 100.0% | 94.4% | 100.0% | 83.3% | 71.4%  | 91.7%  | 100.0% |
| P53    | N (tested) | 54    | 2      | 2      | 0     | 3      | 7     | 5      | 8      | 7     | 0      | 7     | 6      | 4      | 3      |
|        | Mutant     | 14.8% | 0.0%   | 0.0%   | NaN   | 0.0%   | 14.3% | 0.0%   | 25.0%  | 14.3% | NaN    | 28.6% | 0.0%   | 25.0%  | 33.3%  |
|        | Wildtype   | 85.2% | 100.0% | 100.0% | NaN   | 100.0% | 85.7% | 100.0% | 75.0%  | 85.7% | NaN    | 71.4% | 100.0% | 75.0%  | 66.7%  |

**Table S7. Method implementation and parameter specification.**

| Analysis                                     | Method                                                                                                          | Implementation                                                     | Parameters <sup>a</sup>                                                                           |
|----------------------------------------------|-----------------------------------------------------------------------------------------------------------------|--------------------------------------------------------------------|---------------------------------------------------------------------------------------------------|
| Cluster analysis in Functional Patterning    | K-means                                                                                                         | R                                                                  | Iter.max=1000 (kmeans)<br>Nstart=1000 (kmeans)                                                    |
|                                              | Progeny Clustering <sup>b</sup>                                                                                 | R package “progenyclust” <sup>1</sup>                              | method=” both”<br>(progenyClust)                                                                  |
| Network construction                         | Known protein interaction query                                                                                 | STRING <sup>2</sup>                                                | combined score >= 0.9                                                                             |
|                                              | Graphical lasso and StARS                                                                                       | R package “huge” <sup>3</sup>                                      | Nlambda=100 (huge)<br>Criterion=” starts”<br>(huge.select)<br>Stars.thresh=0.05 (huge.select)     |
|                                              | Network visualization                                                                                           | Cytoscape <sup>4</sup>                                             | NA                                                                                                |
| Cluster analysis in Constellation Patterning | Block clustering                                                                                                | R package “blockcluster” <sup>5</sup>                              | Nbtry=20 (coclusterStrategy)<br>Nbxem=20 (coclusterStrategy)<br>Datatype=” binary”<br>(cocluster) |
|                                              | Progeny Clustering <sup>c</sup>                                                                                 | R package “progenyClust” customized for co-clustering <sup>d</sup> | #progenies per cluster<br>block=25 (5 by 5)<br>Iteration=50                                       |
| Tree analysis                                | Decision tree                                                                                                   | R package “rpart” <sup>6</sup>                                     | minsplit=5 (rpart.control)<br>cp=0.02 (rpart.control)                                             |
| Other statistical analysis                   | Pearson Correlation, One-way ANOVA, Kaplan-Meier, Pearson’s Chi-squared test, Multiple testing correction (FDR) | R                                                                  | NA                                                                                                |

**References**

1. Hu, C. & Qutub, A. progenyClust: an R package for Progeny Clustering. *R J.* (2016).
2. Franceschini, A. *et al.* STRING v9. 1: protein-protein interaction networks, with increased coverage and integration. *Nucleic Acids Res.* **41**, D808-D815 (2013).
3. Zhao, T., Liu, H. & Roeder, K. The huge package for high-dimensional undirected graph estimation in r. *J. Mach. Learn. Res.* **13**, 1059-1062 (2012).
4. Shannon, P. *et al.* Cytoscape : A Software Environment for Integrated Models of Biomolecular Interaction Networks Cytoscape : A Software Environment for Integrated Models of Biomolecular Interaction Networks. *Genome Res.* 2498-2504 (2003).

doi:10.1101/gr.1239303

5. Bhatia, P., Iovleff, S. & Govaert, G. blockcluster: An R Package for Model Based Co-Clustering. (2014).
6. Therneau, T., Atkinson, B. & Ripley, B. rpart: Recursive partitioning. *R Packag. version* (2010).

## Notes

- a. Default parameter values are not specified.
- b. Clusters of too small a size were removed (with fewer than 5 fresh samples or clusters with fewer than 25% of the expected number of fresh samples), and samples in those clusters were re-assigned to clusters with the closest center.
- c. Progeny Clustering initially picked 14 signatures by 11 constellations as the optimal clustering solution (see Table S7). However, since Signature 9 contains only 2 patients (which is infeasible for subsequent statistical analyses), we combined Signature 9 with its most similar signature, Signature 8. This combination results in the final structure of 13 signatures as shown in Figure 3A.
- d. The progenyClust code was customized for co-clustering, in which progenies were first constructed for each 2-dimensional cluster block by bootstrapping values within the block, and were then randomly populated within 5 by 5 blocks for re-clustering. The clustering stability was assessed by the chances of progenies within the same blocks being re-clustered together.

**Table S8. Stability scores from Progeny Clustering for co-clustering.** The Progeny Clustering result showed that the structure of 14 signatures by 11 constellations is the optimal solution. Note that the final 13 signatures were derived from the original 14 by 11 co-clustering result by merging Signature 9 (of only 2 patients) with Signature 8 (the signature closest to Signature 9).

|                   | 6 Signatures | 7 Signatures | 8 Signatures | 9 Signatures | 10 Signatures | 11 Signatures | 12 Signatures | 13 Signatures | 14 Signatures | 15 Signatures |
|-------------------|--------------|--------------|--------------|--------------|---------------|---------------|---------------|---------------|---------------|---------------|
| 8 Constellations  | 7.64         | 7.18         | 8.82         | 11.31        | 14.39         | 11.36         | 9.77          | 11.67         | 11.81         | 12.91         |
| 9 Constellations  | 6.54         | 8.27         | 10.92        | 12.99        | 12.62         | 13.77         | 12.80         | 12.33         | 15.87         | 19.79         |
| 10 Constellations | 7.90         | 11.71        | 11.34        | 9.71         | 14.24         | 18.09         | 10.78         | 12.91         | 15.13         | 17.46         |
| 11 Constellations | 9.56         | 12.16        | 12.37        | 15.31        | 16.27         | 14.90         | 19.83         | 13.05         | 32.60         | 16.89         |
| 12 Constellations | 10.02        | 9.96         | 12.09        | 14.94        | 24.84         | 18.35         | 18.57         | 20.33         | 21.69         | 19.34         |

# Meta-Galaxy Analysis Online Tool Tutorial

## Data Preparation

Before using the tool, please prepare your data in the following two “.csv” files:

- **Main Data.** This file should contain all sample measurements that you wish to analyze via the Meta-Galaxy analysis portal, including numeric measurements such as gene/protein expression (required), as well as clinical attributes such as survival and demographic information (optional, only required in the ‘Clinic’ module). The data should be structured, in which rows are samples and columns are measurements.
- **Pathway Definition.** This file should specify the pathway membership of each gene/protein contained in the main data file. The data should consist of two columns, with gene/protein names in the first column and their pathway names in the second column.

## Meta-Galaxy Analysis

Upon uploading the data files at the portal, the pathway names will be automatically parsed and populated in the left grey column box. By selecting a pathway name in the list, the portal will automatically start the analysis for that pathway.

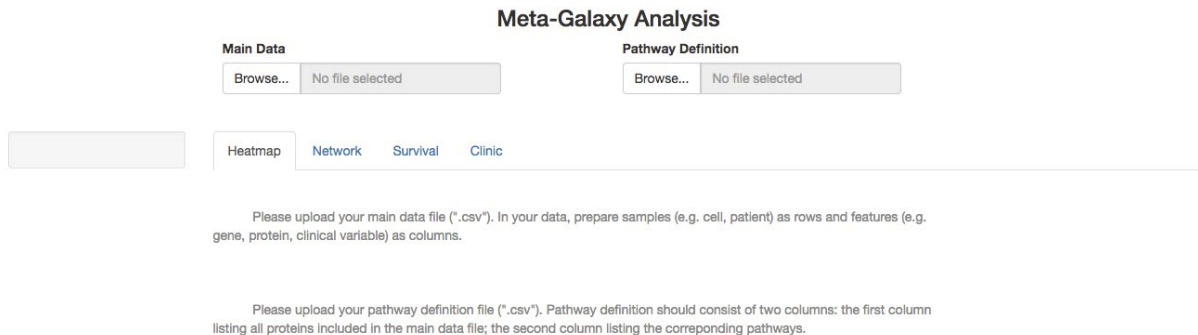

**Meta-Galaxy Analysis**

Main Data Browse... No file selected

Pathway Definition Browse... No file selected

Heatmap Network Survival Clinic

Please upload your main data file (\*.csv). In your data, prepare samples (e.g. cell, patient) as rows and features (e.g. gene, protein, clinical variable) as columns.

Please upload your pathway definition file (\*.csv). Pathway definition should consist of two columns: the first column listing all proteins included in the main data file; the second column listing the corresponding pathways.

The portal offers four modules of analyses for each pathway: Heatmap, Network, Survival, Clinic. Users can select and switch between analysis modules by clicking on the tabs underneath the data upload panel. In each module, the analysis results (i.e. figures and tables) will be displayed in the central panel underneath the analysis tabs, whereas the grey panel on the right offers options to adjust parameters and download the figures/tables.

**Heatmap.** This module provides cluster analysis, which clusters samples based on the genes/proteins in the pathway using *k-means* algorithm and clusters genes/proteins using *hierarchical clustering (ward linkage)* algorithm. The optimal number of sample clusters,

determined using *Progeny Clustering* algorithm, are automatically shown. Users have the option to adjust the number of clusters, and download the figures as well as the cluster memberships.

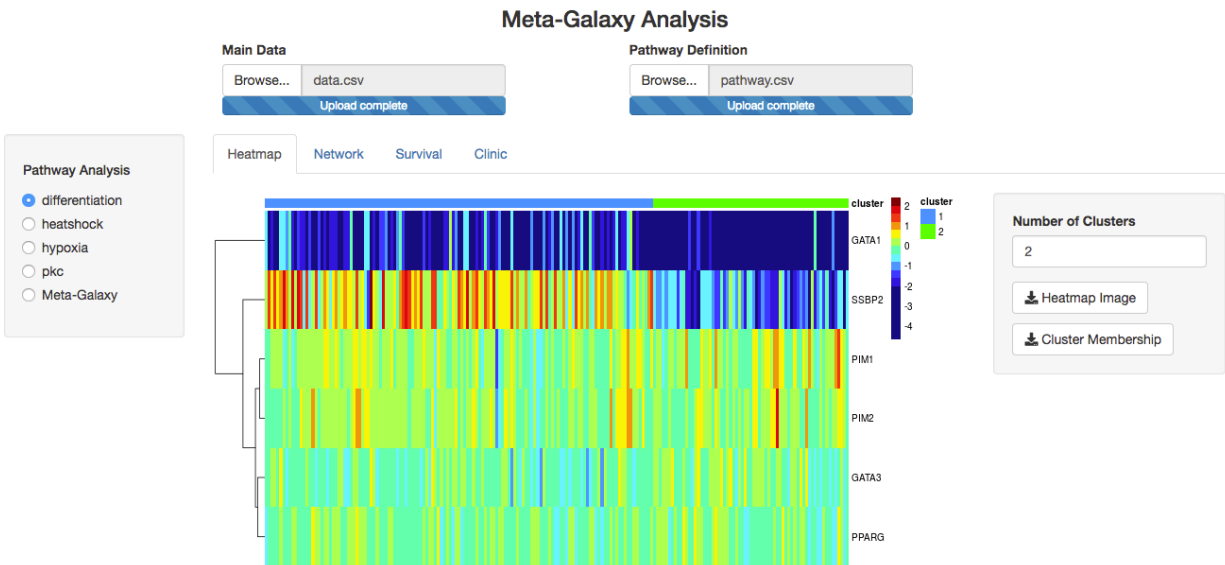

**Network.** This module provides network analysis, which uses the *glasso* algorithm to construct the network connections. The network will display all genes/proteins of the pathway (in a bigger node size), as well as genes/proteins from other pathways that are connected to the pathway (in a smaller node size). The node color indicates the median expression level of that gene/protein in the chosen cluster. Users have the option to zoom in and out of the network, move and adjust the network display, and select which cluster to look at.

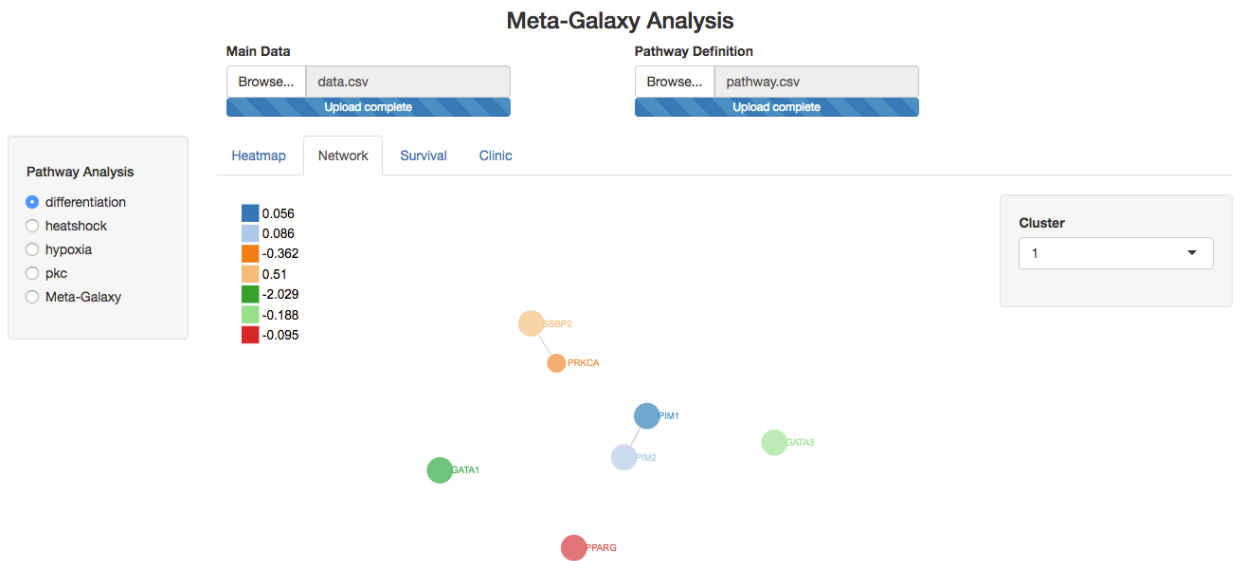



**Survival.** This module provides survival analysis, which plots the *Kaplan-Meier* curves for survival stats. Users have the option to choose the variables for creating the survival curves, displaying risk table and confidence intervals, adjusting the time interval for the plot, and downloading the figure.

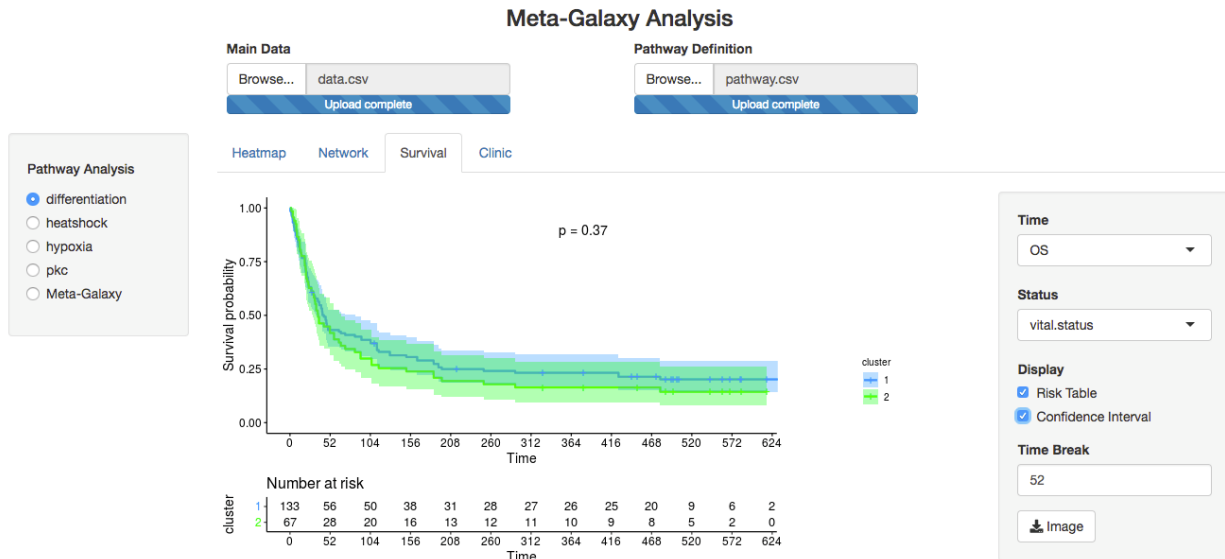

**Clinic.** This module analyzes relations between clinical variables and the clusters (as determined in the Heatmap module). Any categorical or numeric measurements except the gene/protein measurements will be automatically extracted and included in the analysis. Users have the option to select the clinical variables of interest, adjust the display length, search for a particular clinical variable, and download the table.

**Meta-Galaxy Analysis**

Main Data: data.csv (Upload complete)  
 Pathway Definition: pathway.csv (Upload complete)

Heatmap | Network | Survival | **Clinic**

Pathway Analysis:  
 differentiation  
 heatshock  
 hypoxia  
 pkc  
 Meta-Galaxy

Show 10 entries | Search:

| Category  | Type     | Count | Freq  | C1.freq | C2.freq | pvalue.all | C1.n | C2.n | pvalue  |
|-----------|----------|-------|-------|---------|---------|------------|------|------|---------|
| Total     | Count    | 200   | 1     | 0.665   | 0.335   | 5e-04      | 133  | 67   | 5e-04   |
| SEX       | F        | 108   | 0.54  | 0.534   | 0.552   | 0.92337    | 71   | 37   | 0.00107 |
| SEX       | M        | 92    | 0.46  | 0.466   | 0.448   |            | 62   | 30   | 0.00085 |
| PRIOR.MAL | NO       | 162   | 0.81  | 0.812   | 0.806   | 1          | 108  | 54   | 2e-05   |
| PRIOR.MAL | YES      | 38    | 0.19  | 0.188   | 0.194   |            | 25   | 13   | 0.05158 |
| FLT3      | Mutant   | 66    | 0.333 | 0.382   | 0.239   | 0.06309    | 50   | 16   | 3e-05   |
| FLT3      | Wildtype | 132   | 0.667 | 0.618   | 0.761   |            | 81   | 51   | 0.00902 |

Clinical Variables:  
 SEX  
 PRIOR.MAL  
 FLT3  
 Relapse  
 vital.status  
 Table

Showing 1 to 7 of 7 entries | Previous 1 Next
